# Supplementary material for: β-Cyclocitral, a Master Regulator of Multiple Stress-Responsive Genes in Solanum lycopersicum L. Plants
Source: Plants (Basel). 2021 Nov 15;10(11):2465. doi: 10.3390/plants10112465 (PMC8618229; doi:10.3390/plants10112465)
Supplement: Supplementary file 1 [file plants-10-02465-s001.zip]

Archive with 8 entries (8 files):
- Supplemental Data S1.xlsx
- Supplemental Data S2.xlsx
- Supplemental Data S3.xlsx
- Supplemental Data S4.xlsx
- Supplemental Data S5.xlsx
- Supplemental Data S6.pdf
- Supplemental Data S7.pdf
- Supplemental Figure S1.pdf
