# Supplementary material for: β-Cyclocitral, a Master Regulator of Multiple Stress-Responsive Genes in Solanum lycopersicum L. Plants
Source: Plants (Basel). 2021 Nov 15;10(11):2465. doi: 10.3390/plants10112465 (PMC8618229; doi:10.3390/plants10112465)
Supplement: Supplementary file 1 [file plants-10-02465-s001.zip › Supplemental Data S1.xlsx]

## Sheet: Coding DEGs
GeneID	Base mean	log2(FC)	StdErr	Wald-Stats	P-value	P-adj	Chromosome	Start	End	Strand	Feature	transcript_stable_id	protein_stable_id	xref	KeggID	Entry	Protein names
Solyc06g008620.1	4927.53	-4.61641	0.377758	-12.2206	2.41394e-34	2.64641e-30	6	2516155	2518138	-	protein_coding	Solyc06g008620.1.1	Solyc06g008620.1.1.1	101247825	sly:101247825	A0A3Q7GN27	Uncharacterized protein
Solyc05g046310.3	6252.36	2.98487	0.315192	9.47003	2.79758e-21	1.02233e-17	5	59375498	59378228	-	protein_coding	Solyc05g046310.3.1	Solyc05g046310.3.1	101265337	sly:101265337	A0A3Q7HDY9	Uncharacterized protein
Solyc12g005850.2	4635.82	-2.4994	0.278897	-8.96174	3.19606e-19	1.0011e-15	12	481457	489045	-	protein_coding	Solyc12g005850.2.1	Solyc12g005850.2.1	101248172	sly:101248172	A0A3Q7JR91	Protein DETOXIFICATION (Multidrug and toxic compound extrusion protein)
Solyc10g085870.1	5690.6	-3.94877	0.449275	-8.78921	1.50612e-18	4.1279e-15	10	65037325	65038786	+	protein_coding	Solyc10g085870.1.1	Solyc10g085870.1.1.1	101261675	sly:101261675	A0A3Q7IN36	Uncharacterized protein
Solyc10g052880.1	5649.13	-2.22147	0.262218	-8.47184	2.41538e-17	4.81451e-14	10	54038625	54040062	+	protein_coding	Solyc10g052880.1.1	Solyc10g052880.1.1.1	101262461	sly:101262461	A0A3Q7IGR5	LRRNT_2 domain-containing protein
Solyc02g094040.3	1105.66	-3.30993	0.395056	-8.37837	5.36672e-17	9.8059e-14	2	55324162	55327282	+	protein_coding	Solyc02g094040.3.1	Solyc02g094040.3.1	101263181	sly:101263181	A0A3Q7FC39	Lipase
Solyc05g056560.3	6077.54	1.92873	0.233015	8.27727	1.26032e-16	1.97384e-13	5	66660865	66671350	-	protein_coding	Solyc05g056560.3.1	Solyc05g056560.3.1	101265642	sly:101265642	A0A3Q7HI65	DUF775 domain-containing protein
Solyc03g120310.3	2272.31	-1.68298	0.213567	-7.88032	3.26553e-15	3.97777e-12	3	70228383	70234101	+	protein_coding	Solyc03g120310.3.1	Solyc03g120310.3.1	101247116	sly:101247116	A0A3Q7GKD4	Glycos_transf_1 domain-containing protein
Solyc04g078420.1	22973.8	2.16457	0.281197	7.69769	1.38547e-14	1.38081e-11	4	63247859	63248846	-	protein_coding	Solyc04g078420.1.1	Solyc04g078420.1.1.1	101244577	sly:101244577	A0A3Q7GA52	Uncharacterized protein
Solyc03g115230.3	65210.9	2.61181	0.350287	7.4562	8.90544e-14	7.81043e-11	3	66496017	66499688	-	protein_coding	Solyc03g115230.3.1	Solyc03g115230.3.1	101254583	sly:101254583	A0A3Q7FQU3	Uncharacterized protein
Solyc06g076020.3	61570.8	2.2047	0.295973	7.44901	9.40468e-14	7.93104e-11	6	47333985	47337132	-	protein_coding	Solyc06g076020.3.1	Solyc06g076020.3.1	100736433	sly:100736433	A0A3Q7H3P6	Uncharacterized protein
Solyc05g051660.1	8652.53	-2.63606	0.354707	-7.43166	1.07245e-13	8.7091e-11	5	62899478	62900447	+	protein_coding	Solyc05g051660.1.1	Solyc05g051660.1.1.1	101253900	sly:101253900	K4C1J7	Acylsugar acylhydrolase 1
Solyc09g092690.3	75229.3	1.96976	0.267077	7.37526	1.6402e-13	1.25559e-10	9	72130435	72136509	+	protein_coding	Solyc09g092690.3.1	Solyc09g092690.3.1	101255537	sly:101255537	A0A3Q7I8W5	Peptidylprolyl isomerase (EC 5.2.1.8)
Solyc02g077670.3	16131.7	2.05888	0.279222	7.37361	1.66068e-13	1.25559e-10	2	43126475	43131134	-	protein_coding	Solyc02g077670.3.1	Solyc02g077670.3.1	101262478	sly:101262478	A0A3Q7F3P7	J domain-containing protein
Solyc12g014010.2	16101.9	-3.18238	0.451747	-7.0446	1.85988e-12	1.27437e-09	12	4844610	4847288	+	protein_coding	Solyc12g014010.2.1	Solyc12g014010.2.1	101253864	sly:101253864	A0A3Q7J5C5	Uncharacterized protein
Solyc12g013690.2	14536	-1.82759	0.262161	-6.97126	3.14111e-12	2.08703e-09	12	4532292	4535369	-	protein_coding	Solyc12g013690.2.1	Solyc12g013690.2.1	101247497	sly:101247497	A0A3Q7J492	FAD_binding_3 domain-containing protein
Solyc09g005480.3	919.558	3.19574	0.460973	6.9326	4.1318e-12	2.58839e-09	9	331222	334071	-	protein_coding	Solyc09g005480.3.1	Solyc09g005480.3.1	101250249	sly:101250249	A0A3Q7HVU4	F-box domain-containing protein
Solyc05g009340.1	1127.93	1.9537	0.282706	6.91072	4.82205e-12	2.85752e-09	5	3485364	3485721	-	protein_coding	Solyc05g009340.1.1	Solyc05g009340.1.1.1	104647284	sly:104647284	A0A3Q7GDG3	Uncharacterized protein
Solyc02g086770.3	816.674	-1.93426	0.279741	-6.91448	4.69598e-12	2.85752e-09	2	50020389	50023849	-	protein_coding	Solyc02g086770.3.1	Solyc02g086770.3.1	101252135	sly:101252135	A0A3Q7F873	3Beta_HSD domain-containing protein
Solyc12g009240.1	2028.96	1.99304	0.289998	6.8726	6.30406e-12	3.63744e-09	12	2519890	2520637	-	protein_coding	Solyc12g009240.1.1	Solyc12g009240.1.1.1	101253257	sly:101253257	A0A3Q7J3S7	AP2/ERF domain-containing protein
Solyc10g083690.3	1633.82	-3.10707	0.4568	-6.80182	1.03305e-11	5.26757e-09	10	63589341	63590944	+	protein_coding	Solyc10g083690.3.1	Solyc10g083690.3.1	101264574	sly:101264574	A0A3Q7IMV1	Uncharacterized protein
Solyc04g079360.1	3095.41	2.62905	0.394335	6.66706	2.60987e-11	1.30055e-08	4	63974715	63975474	+	protein_coding	Solyc04g079360.1.1	Solyc04g079360.1.1.1	101262913	sly:101262913	A0A3Q7H2B0	Uncharacterized protein
Solyc06g072220.1	1199.32	-2.56181	0.387536	-6.61052	3.82975e-11	1.86602e-08	6	44647755	44648391	+	protein_coding	Solyc06g072220.1.1	Solyc06g072220.1.1.1	101248784	sly:101248784	A0A3Q7GYL5	Uncharacterized protein
Solyc03g118970.3	4499.38	-1.84414	0.282003	-6.53943	6.17541e-11	2.94352e-08	3	69197029	69200063	-	protein_coding	Solyc03g118970.3.1	Solyc03g118970.3.1	101268373	sly:101268373	A0A3Q7FW04	Protein DETOXIFICATION (Multidrug and toxic compound extrusion protein)
Solyc10g079380.2	44.9984	-3.53728	0.542364	-6.52196	6.93937e-11	3.23729e-08	10	61058705	61061297	+	protein_coding	Solyc10g079380.2.1	Solyc10g079380.2.1	101254651	sly:101254651	A0A3Q7IK60	HSF_DOMAIN domain-containing protein
Solyc03g043700.3	804.532	2.49763	0.385599	6.47727	9.33986e-11	4.01541e-08	3	7240470	7244083	-	protein_coding	Solyc03g043700.3.1	Solyc03g043700.3.1	101263288	sly:101263288	A0A3Q7FJ51	Uncharacterized protein
Solyc03g093610.1	4066.87	1.66819	0.258159	6.46186	1.03424e-10	4.36092e-08	3	56458290	56459019	+	protein_coding	Solyc03g093610.1.1	Solyc03g093610.1.1.1	101267589	sly:101267589	A0A3Q7GAZ8	AP2/ERF domain-containing protein
Solyc09g011170.3	267.329	1.72403	0.269042	6.40803	1.47414e-10	5.98555e-08	9	4510784	4522300	-	protein_coding	Solyc09g011170.3.1	Solyc09g011170.3.1	778232	sly:778232	A0A3Q7I026	BHLH domain-containing protein
Solyc06g072230.1	765.946	-2.47465	0.386013	-6.4108	1.44757e-10	5.98555e-08	6	44650515	44651118	+	protein_coding	Solyc06g072230.1.1	Solyc06g072230.1.1.1	101248491	sly:101248491	A0A3Q7GZA3	Uncharacterized protein
Solyc11g066100.2	82186.4	2.19283	0.34344	6.38489	1.71521e-10	6.83777e-08	11	52067537	52069938	-	protein_coding	Solyc11g066100.2.1	Solyc11g066100.2.1	101255164	sly:101255164	A0A3Q7IYI9	Uncharacterized protein
Solyc03g020010.1	925.969	-3.23446	0.512374	-6.31268	2.74243e-10	1.05492e-07	3	62686556	62687174	-	protein_coding	Solyc03g020010.1.1	Solyc03g020010.1.1.1	101255468	sly:101255468	O48625	Lemir
Solyc08g081040.3	1132.76	-1.61441	0.257754	-6.26339	3.76702e-10	1.42406e-07	8	64284607	64286742	+	protein_coding	Solyc08g081040.3.1	Solyc08g081040.3.1	101259063	sly:101259063	A0A3Q7HW13	Uncharacterized protein
Solyc03g114960.3	16720.8	-2.4543	0.392881	-6.24692	4.18616e-10	1.55569e-07	3	66295927	66301194	+	protein_coding	Solyc03g114960.3.1	Solyc03g114960.3.1	101258351	sly:101258351	A0A3Q7FSS8	Uncharacterized protein
Solyc07g054760.1	17274.6	1.18228	0.191779	6.16479	7.05769e-10	2.53683e-07	7	63106435	63106687	-	protein_coding	Solyc07g054760.1.1	Solyc07g054760.1.1.1	101254813	sly:101254813	A0A3Q7HFT4	Uncharacterized protein
Solyc09g059950.3	484.057	1.85348	0.305356	6.06989	1.27995e-09	4.45462e-07	9	57176419	57182674	+	protein_coding	Solyc09g059950.3.1	Solyc09g059950.3.1	101254127	sly:101254127	A0A3Q7I2D6	Uncharacterized protein
Solyc04g014520.1	38.6819	-3.01054	0.499205	-6.03068	1.6327e-09	5.42402e-07	4	4795239	4796133	+	protein_coding	Solyc04g014520.1.1	Solyc04g014520.1.1.1	101260335	sly:101260335	A0A3Q7FZR2	Uncharacterized protein
Solyc10g055410.2	2719.32	-1.40802	0.23395	-6.01845	1.76097e-09	5.76285e-07	10	56666388	56667758	-	protein_coding	Solyc10g055410.2.1	Solyc10g055410.2.1	544294	sly:544294	Q43525	Transcription factor
Solyc05g052130.3	338.301	-2.96857	0.496298	-5.98142	2.21202e-09	7.13245e-07	5	63292008	63294596	+	protein_coding	Solyc05g052130.3.1	Solyc05g052130.3.1	101268763	sly:101268763	A0A3Q7GNR8	zf-LSD1 domain-containing protein
Solyc03g120090.1	7035.96	1.71432	0.288899	5.93398	2.95669e-09	9.2612e-07	3	70072259	70073177	+	protein_coding	Solyc03g120090.1.1	Solyc03g120090.1.1.1	101251664	sly:101251664	A0A3Q7FUW9	SOR_SNZ domain-containing protein
Solyc08g079480.3	519.087	-1.44093	0.243487	-5.91792	3.26041e-09	9.92885e-07	8	63118865	63120146	+	protein_coding	Solyc08g079480.3.1	Solyc08g079480.3.1	101265157	sly:101265157	A0A3Q7HSS8	Uncharacterized protein
Solyc06g054670.2	53.6636	-2.58227	0.438062	-5.89475	3.75256e-09	1.12295e-06	6	37549747	37551683	+	protein_coding	Solyc06g054670.2.1	Solyc06g054670.2.1	101257379	sly:101257379	A0A3Q7GTC9	Uncharacterized protein
Solyc05g012630.1	176.444	-2.14606	0.365263	-5.87538	4.2187e-09	1.23332e-06	5	5830361	5832623	+	protein_coding	Solyc05g012630.1.1	Solyc05g012630.1.1.1	101251378	sly:101251378	A0A3Q7GGS5	Uncharacterized protein
Solyc08g080540.3	4849.87	2.41846	0.411804	5.87284	4.28397e-09	1.23592e-06	8	63940375	63941991	-	protein_coding	Solyc08g080540.3.1	Solyc08g080540.3.1	101267632	sly:101267632	A0A3Q7HTF6	HSF_DOMAIN domain-containing protein
Solyc11g010250.1	3576.56	2.2146	0.38849	5.70053	1.19433e-08	3.31481e-06	11	3317227	3317653	-	protein_coding	Solyc11g010250.1.1	Solyc11g010250.1.1.1	101262884	sly:101262884	A0A3Q7IQN6	Uncharacterized protein
Solyc01g080010.2	13426.7	-2.90248	0.510474	-5.68586	1.30158e-08	3.56731e-06	1	78993763	78995300	-	protein_coding	Solyc01g080010.2.1	Solyc01g080010.2.1.1	543853	sly:543853	A0A3Q7EHP2	Peptidase A1 domain-containing protein
Solyc09g065800.3	80.3897	-2.93487	0.519086	-5.65391	1.56837e-08	4.19367e-06	9	64303549	64304995	-	protein_coding	Solyc09g065800.3.1	Solyc09g065800.3.1	101267160	sly:101267160	A0A3Q7I657	3-ketoacyl-CoA synthase (EC 2.3.1.-)
Solyc10g078930.2	106206	1.19841	0.214044	5.59889	2.15729e-08	5.63104e-06	10	60698753	60704557	-	protein_coding	Solyc10g078930.2.1	Solyc10g078930.2.1	101256232	sly:101256232	A0A3Q7IJV9	Aha1_N domain-containing protein
Solyc11g012510.2	2871.5	1.51875	0.276671	5.48938	4.03343e-08	1.04043e-05	11	5329622	5332918	-	protein_coding	Solyc11g012510.2.1	Solyc11g012510.2.1.1	100037497	sly:100037497	A0A3Q7IRV0	GRAS domain-containing protein
Solyc09g005120.3	12362.8	1.78647	0.325752	5.48415	4.15462e-08	1.05924e-05	9	70159	75621	-	protein_coding	Solyc09g005120.3.1	Solyc09g005120.3.1	101256620	sly:101256620	A0A3Q7HXF0	J domain-containing protein
Solyc06g071750.3	824.554	2.05094	0.374701	5.47353	4.41163e-08	1.11183e-05	6	44337134	44338376	+	protein_coding	Solyc06g071750.3.1	Solyc06g071750.3.1	101267816	sly:101267816	A0A3Q7GZ15	PB1 domain-containing protein
Solyc09g009150.1	859.611	-1.70159	0.31438	-5.41253	6.21388e-08	1.53085e-05	9	2488336	2489845	+	protein_coding	Solyc09g009150.1.1	Solyc09g009150.1.1.1	101263453	sly:101263453	A0A3Q7HYY7	Apple domain-containing protein
Solyc08g082960.3	674.242	1.61865	0.301333	5.37164	7.80255e-08	1.85955e-05	8	65717528	65721276	+	protein_coding	Solyc08g082960.3.1	Solyc08g082960.3.1	101268493	sly:101268493	A0A3Q7HUS6	HIT-type domain-containing protein
Solyc07g040960.1	27725.5	1.7282	0.322345	5.36132	8.26154e-08	1.94777e-05	7	51347786	51349286	+	protein_coding	Solyc07g040960.1.1	Solyc07g040960.1.1.1	100301928	sly:100301928	A0A3Q7HBL3	DDE Tnp4 domain-containing protein
Solyc09g011030.3	15272.6	1.89924	0.35904	5.28977	1.22468e-07	2.79711e-05	9	4367694	4373180	-	protein_coding	Solyc09g011030.3.1	Solyc09g011030.3.1	101253115	sly:101253115	A0A3Q7HXU3	TOG domain-containing protein
Solyc01g081210.3	1802.55	-1.84379	0.35435	-5.2033	1.95785e-07	4.33614e-05	1	80350299	80352136	-	protein_coding	Solyc01g081210.3.1	Solyc01g081210.3.1	101252431	sly:101252431	A0A3Q7EIG0	Uncharacterized protein
Solyc02g080530.3	28059.5	-1.43338	0.276229	-5.1891	2.11314e-07	4.63327e-05	2	45294815	45296528	-	protein_coding	Solyc02g080530.3.1	Solyc02g080530.3.1	101253648	sly:101253648	A0A3Q7F5S0	Peroxidase (EC 1.11.1.7)
Solyc06g049020.1	6671.29	1.67457	0.326507	5.12872	2.91712e-07	6.27066e-05	6	32352673	32353333	-	protein_coding	Solyc06g049020.1.1	Solyc06g049020.1.1.1	101254906	sly:101254906	A0A3Q7GRC5	Uncharacterized protein
Solyc09g056450.3	4873.31	1.35802	0.265981	5.1057	3.29569e-07	7.01566e-05	9	49451764	49455316	-	protein_coding	Solyc09g056450.3.1	Solyc09g056450.3.1	101262653	sly:101262653	A0A3Q7I3N4	RING-type E3 ubiquitin transferase (EC 2.3.2.27)
Solyc11g071830.2	6393.67	2.25688	0.443794	5.08541	3.66824e-07	7.65998e-05	11	55476187	55479614	-	protein_coding	Solyc11g071830.2.1	Solyc11g071830.2.1	101259708	sly:101259708	A0A3Q7J0I4	Uncharacterized protein
Solyc08g006410.3	509.449	-2.29955	0.453569	-5.06989	3.9805e-07	8.23362e-05	8	1011700	1013468	+	protein_coding	Solyc08g006410.3.1	Solyc08g006410.3.1	101264651	sly:101264651	A0A3Q7IE23	Glycosyltransferase (EC 2.4.1.-)
Solyc08g080860.3	486.181	-1.86132	0.36845	-5.05175	4.37791e-07	8.88796e-05	8	64162825	64164869	-	protein_coding	Solyc08g080860.3.1	Solyc08g080860.3.1	101261438	sly:101261438	A0A3Q7HTL2	Uncharacterized protein
Solyc10g085590.1	2451.12	1.20645	0.239936	5.02822	4.95046e-07	9.86763e-05	10	64835762	64836974	+	protein_coding	Solyc10g085590.1.1	Solyc10g085590.1.1.1	101267950	sly:101267950	A0A3Q7JGU6	Uncharacterized protein
Solyc11g010380.2	24499.6	-1.58328	0.314836	-5.02892	4.93251e-07	9.86763e-05	11	3451552	3457602	-	protein_coding	Solyc11g010380.2.1	Solyc11g010380.2.1	101265986	sly:101265986	A0A3Q7IRY2	Protein DETOXIFICATION (Multidrug and toxic compound extrusion protein)
Solyc03g083350.3	3670.23	1.28295	0.256743	4.99703	5.82202e-07	0.000111977	3	54608227	54615871	+	protein_coding	Solyc03g083350.3.1	Solyc03g083350.3.1	101256074	sly:101256074	A0A3Q7FKV7	Uncharacterized protein
Solyc01g095620.3	10451	-1.87093	0.374843	-4.99124	5.99936e-07	0.000114384	1	86703859	86705290	-	protein_coding	Solyc01g095620.3.1	Solyc01g095620.3.1.1	101244237	sly:101244237	D7S016	Glycosyltransferase (EC 2.4.1.-)
Solyc08g075240.3	138.022	-2.16525	0.435511	-4.97174	6.63546e-07	0.000121241	8	59491526	59497193	+	protein_coding	Solyc08g075240.3.1	Solyc08g075240.3.1	101255616	sly:101255616	A0A3Q7IM21	Long-chain-alcohol oxidase (EC 1.1.3.20)
Solyc02g069260.3	3310.56	2.00089	0.409354	4.88793	1.01901e-06	0.000180183	2	39771948	39778844	+	protein_coding	Solyc02g069260.3.1	Solyc02g069260.3.1	101249141	sly:101249141	K4B7Q8	AGO2A2
Solyc04g007310.2	22.4396	-2.7638	0.566887	-4.87541	1.08585e-06	0.000190466	4	1029495	1031138	+	protein_coding	Solyc04g007310.2.1	Solyc04g007310.2.1	101262910	sly:101262910	A0A3Q7GNK5	Uncharacterized protein
Solyc09g009840.1	5106.08	-1.77553	0.368575	-4.81727	1.45534e-06	0.000239923	9	3333020	3333887	-	protein_coding	Solyc09g009840.1.1	Solyc09g009840.1.1.1	101254416	sly:101254416	A0A3Q7HX70	Uncharacterized protein
Solyc03g113100.3	38071.4	1.0152	0.21244	4.77878	1.76366e-06	0.000279526	3	64862410	64868216	-	protein_coding	Solyc03g113100.3.1	Solyc03g113100.3.1	101247803	sly:101247803	K4BKG3	UBC2
Solyc05g052520.3	3105.67	1.46838	0.307332	4.77782	1.77206e-06	0.000279526	5	63597743	63599919	-	protein_coding	Solyc05g052520.3.1	Solyc05g052520.3.1	101258862	sly:101258862	A0A3Q7GLI8	Protein-serine/threonine phosphatase (EC 3.1.3.16)
Solyc04g014600.3	28419.1	1.3429	0.281003	4.77893	1.76227e-06	0.000279526	4	4873169	4875224	+	protein_coding	Solyc04g014600.3.1	Solyc04g014600.3.1	101265425	sly:101265425	A0A3Q7FXR6	Usp domain-containing protein
Solyc08g074960.3	362.051	1.39546	0.29273	4.76706	1.86936e-06	0.000292768	8	59219056	59223519	+	protein_coding	Solyc08g074960.3.1	Solyc08g074960.3.1	101262446	sly:101262446	A0A3Q7HSU6	Nodulin-like domain-containing protein
Solyc03g117270.1	2613.44	-1.98983	0.421607	-4.71964	2.36259e-06	0.000357257	3	67931798	67933070	+	protein_coding	Solyc03g117270.1.1	Solyc03g117270.1.1.1	101264199	sly:101264199	A0A3Q7FT50	F-box domain-containing protein
Solyc04g014260.2	262.91	-2.60519	0.560685	-4.64644	3.37709e-06	0.000493641	4	4560925	4562353	-	protein_coding	Solyc04g014260.2.1	Solyc04g014260.2.1	101246239	sly:101246239	A0A3Q7FZL4	Uncharacterized protein
Solyc01g094020.3	1273.16	-2.15959	0.46771	-4.61737	3.8864e-06	0.000556949	1	85465953	85468008	-	protein_coding	Solyc01g094020.3.1	Solyc01g094020.3.1.1	101259380	sly:101259380	A0A3Q7EKX9	Protein kinase domain-containing protein
Solyc01g086650.3	1947.91	-1.22209	0.266398	-4.58746	4.48672e-06	0.000630614	1	81498517	81503084	-	protein_coding	Solyc01g086650.3.1	Solyc01g086650.3.1	101261158	sly:101261158	A0A3Q7EIN5	TP_methylase domain-containing protein
Solyc02g083860.3	461.643	-1.61747	0.353175	-4.57978	4.65465e-06	0.00065005	2	47677184	47679181	-	protein_coding	Solyc02g083860.3.1	Solyc02g083860.3.1	100736482	sly:100736482	A0A3Q7F6V7	Fe2OG dioxygenase domain-containing protein
Solyc12g009000.1	1237.68	1.93951	0.425208	4.56133	5.08302e-06	0.000705382	12	2301109	2302564	+	protein_coding	Solyc12g009000.1.1	Solyc12g009000.1.1.1	101246112	sly:101246112	A0A3Q7JS08	DDE Tnp4 domain-containing protein
Solyc07g007800.3	834.54	-1.27104	0.279945	-4.54033	5.61669e-06	0.000769698	7	2453818	2457279	+	protein_coding	Solyc07g007800.3.1	Solyc07g007800.3.1	101264738	sly:101264738	A0A3Q7H7L9	Uncharacterized protein
Solyc04g076970.3	1118.42	1.24006	0.273947	4.52663	5.9932e-06	0.000816191	4	62009803	62011252	+	protein_coding	Solyc04g076970.3.1	Solyc04g076970.3.1	101249637	sly:101249637	A0A3Q7G895	DOG1 domain-containing protein
Solyc12g049560.2	3905.94	1.07654	0.238097	4.52143	6.14227e-06	0.000831329	12	62140468	62143254	-	protein_coding	Solyc12g049560.2.1	Solyc12g049560.2.1	101261693	sly:101261693	A0A3Q7JAJ2	AP2/ERF domain-containing protein
Solyc04g063380.3	7472.29	1.05707	0.233872	4.51984	6.18857e-06	0.000832458	4	55526188	55529708	+	protein_coding	Solyc04g063380.3.1	Solyc04g063380.3.1	101254991	sly:101254991	A0A3Q7G362	F-box domain-containing protein
Solyc01g110920.3	1268.69	1.33144	0.296186	4.49528	6.948e-06	0.000917722	1	97313377	97313638	+	protein_coding	Solyc01g110920.3.1	Solyc01g110920.3.1.1	104645435	sly:104645435	A0A3Q7EUC1	Uncharacterized protein
Solyc09g098170.3	6480.74	-1.16602	0.259675	-4.4903	7.11222e-06	0.000928229	9	72545118	72548722	+	protein_coding	Solyc09g098170.3.1	Solyc09g098170.3.1	101261857	sly:101261857	A0A3Q7I8Y6	Uncharacterized protein
Solyc04g076340.3	28943.5	1.33465	0.297536	4.48567	7.26859e-06	0.000943025	4	61341251	61345445	+	protein_coding	Solyc04g076340.3.1	Solyc04g076340.3.1	101255390	sly:101255390	A0A3Q7G5D6	Uncharacterized protein
Solyc03g118060.3	3926.18	2.38149	0.534446	4.45599	8.35084e-06	0.0010523	3	68528500	68529796	-	protein_coding	Solyc03g118060.3.1	Solyc03g118060.3.1	101246122	sly:101246122	A0A3Q7FS74	Uncharacterized protein
Solyc03g119390.3	1136.7	2.33225	0.52545	4.43857	9.05576e-06	0.00112816	3	69498904	69500322	+	protein_coding	Solyc03g119390.3.1	Solyc03g119390.3.1	101255481	sly:101255481	A0A3Q7FUH2	BHLH domain-containing protein
Solyc12g042600.2	14230.3	-2.20998	0.497798	-4.43951	9.01657e-06	0.00112816	12	58884058	58886505	-	protein_coding	Solyc12g042600.2.1	Solyc12g042600.2.1	101257246	sly:101257246	A0A3Q7JVZ9	Glycosyltransferase (EC 2.4.1.-)
Solyc02g065050.1	665.88	1.10242	0.250083	4.40821	1.04229e-05	0.00129115	2	36735179	36736469	-	protein_coding	Solyc02g065050.1.1	Solyc02g065050.1.1.1	101265702	sly:101265702	A0A3Q7F1D5	Peptidase A1 domain-containing protein
Solyc02g082060.2	4221.74	1.66622	0.378127	4.4065	1.05053e-05	0.00129404	2	46351738	46352380	-	protein_coding	Solyc02g082060.2.1	Solyc02g082060.2.1.1	101248067	sly:101248067	A0A3Q7F7Z1	DUF862 domain-containing protein
Solyc02g090990.1	644.412	1.5016	0.341662	4.39498	1.10783e-05	0.001357	2	53078278	53079349	+	protein_coding	Solyc02g090990.1.1	Solyc02g090990.1.1.1	101250273	sly:101250273	A0A3Q7FAL6	Protein kinase domain-containing protein
Solyc10g048190.1	36.3691	-2.12339	0.484342	-4.38406	1.16485e-05	0.00141063	10	44425361	44425778	+	protein_coding	Solyc10g048190.1.1	Solyc10g048190.1.1.1	101261468	sly:101261468	A0A3Q7IFL6	EVE domain-containing protein
Solyc02g082850.3	2593.99	-1.27478	0.291283	-4.37644	1.20636e-05	0.00143754	2	47049421	47055517	-	protein_coding	Solyc02g082850.3.1	Solyc02g082850.3.1	101253958	sly:101253958	A0A3Q7F8F7	Serine O-acetyltransferase (EC 2.3.1.30)
Solyc09g097970.3	410.358	-1.09291	0.251805	-4.34032	1.42279e-05	0.00166408	9	72420522	72423959	+	protein_coding	Solyc09g097970.3.1	Solyc09g097970.3.1	104649444	sly:104649444	A0A3Q7I8W0	Aldo_ket_red domain-containing protein
Solyc08g006690.1	142.327	-1.98854	0.458761	-4.3346	1.46026e-05	0.00169406	8	1257783	1258368	+	protein_coding	Solyc08g006690.1.1	Solyc08g006690.1.1.1	101247841	sly:101247841	A0A3Q7HHH3	PMEI domain-containing protein
Solyc08g006980.3	15365.4	1.12434	0.259466	4.3333	1.46892e-05	0.00169514	8	1555044	1559573	+	protein_coding	Solyc08g006980.3.1	Solyc08g006980.3.1	101256309	sly:101256309	A0A3Q7IEE8	RING-type domain-containing protein
Solyc05g009170.2	195.163	2.39757	0.557342	4.30179	1.69423e-05	0.00191483	5	3304928	3305567	+	protein_coding	Solyc05g009170.2.1	Solyc05g009170.2.1.1	101250797	sly:101250797	A0A3Q7GED8	C2H2-type domain-containing protein
Solyc07g065980.3	12483.6	-1.51096	0.354906	-4.25736	2.06857e-05	0.00227917	7	67674026	67678597	+	protein_coding	Solyc07g065980.3.1	Solyc07g065980.3.1	544236	sly:544236	Q8H6N3	Alkaline alpha-galactosidase seed imbibition protein
Solyc12g096570.1	5200.57	1.888	0.443443	4.2576	2.0663e-05	0.00227917	12	66410696	66411053	-	protein_coding	Solyc12g096570.1.1	Solyc12g096570.1.1.1	100316893	sly:100316893	A0A3Q7JDU3	Uncharacterized protein
Solyc12g044420.1	2431.89	-1.4149	0.332432	-4.2562	2.07929e-05	0.00227952	12	60312360	60313008	-	protein_coding	Solyc12g044420.1.1	Solyc12g044420.1.1.1	101247111	sly:101247111	A0A3Q7JA01	Uncharacterized protein
Solyc01g094010.3	992.529	-1.3694	0.322642	-4.24433	2.19246e-05	0.00239163	1	85458495	85460479	-	protein_coding	Solyc01g094010.3.1	Solyc01g094010.3.1	101244417	sly:101244417	A0A3Q7ELK6	Abhydrolase_3 domain-containing protein
Solyc04g072900.1	15542.2	1.26678	0.298679	4.24125	2.22274e-05	0.00241267	4	59953855	59954650	+	protein_coding	Solyc04g072900.1.1	Solyc04g072900.1.1.1	543714	sly:543714	Q8GZE8	Dehydration-responsive element binding protein 3
Solyc05g056330.3	265.545	-1.22494	0.289191	-4.23574	2.27797e-05	0.00244837	5	66509640	66514171	+	protein_coding	Solyc05g056330.3.1	Solyc05g056330.3.1	101259339	sly:101259339	A0A3Q7GLM7	DDE Tnp4 domain-containing protein
Solyc10g006130.1	11151.6	1.21367	0.287041	4.2282	2.35569e-05	0.00251956	10	857309	857975	-	protein_coding	Solyc10g006130.1.1	Solyc10g006130.1.1.1	101249309	sly:101249309	A0A3Q7IBC2	AP2/ERF domain-containing protein
Solyc03g120330.1	48.2491	-1.95041	0.461664	-4.22473	2.39229e-05	0.00254628	3	70239853	70240939	-	protein_coding	Solyc03g120330.1.1	Solyc03g120330.1.1.1	101246810	sly:101246810	A0A3Q7FTI1	F-box domain-containing protein
Solyc08g076930.1	10817.6	1.14842	0.272243	4.21838	2.46068e-05	0.00260642	8	60990465	60992535	+	protein_coding	Solyc08g076930.1.1	Solyc08g076930.1.1.1	544165	sly:544165	A0A3Q7HRZ6	Transcription factor MYC2 (LeMYC2) (SlMYC2) (Basic helix-loop-helix protein 147) (Transcription factor bHLH147) (bHLH transcription factor bHLH147)
Solyc03g020030.3	149.642	-2.17775	0.520771	-4.18179	2.89224e-05	0.00300547	3	62653112	62654041	+	protein_coding	Solyc03g020030.3.1	Solyc03g020030.3.1	109119847	sly:109119847	A0A3Q7FH23	Uncharacterized protein
Solyc06g065340.1	425.08	-1.62339	0.388968	-4.17359	2.99841e-05	0.0031011	6	40876256	40876931	-	protein_coding	Solyc06g065340.1.1	Solyc06g065340.1.1.1	101251995	sly:101251995	A0A3Q7GYV7	Uncharacterized protein
Solyc07g017610.3	5416.24	-1.34835	0.324311	-4.15758	3.21636e-05	0.00331088	7	7658116	7671210	+	protein_coding	Solyc07g017610.3.1	Solyc07g017610.3.1	101261722	sly:101261722	A0A3Q7H8R6	Lysine ketoglutarate reductase (EC 1.5.1.8) (EC 1.5.1.9) (Saccharopine dehydrogenase)
Solyc03g112310.1	1903.15	1.24901	0.300867	4.15136	3.30498e-05	0.00337047	3	64237657	64239646	+	protein_coding	Solyc03g112310.1.1	Solyc03g112310.1.1.1	101266620	sly:101266620	K4BK85	Clade X lectin receptor kinase
Solyc01g111970.3	185.954	1.56882	0.378201	4.14812	3.35215e-05	0.00340274	1	98021746	98025336	-	protein_coding	Solyc01g111970.3.1	Solyc01g111970.3.1	101250637	sly:101250637	A0A3Q7FF59	Uncharacterized protein
Solyc10g007830.1	92.3346	-2.29218	0.555665	-4.12512	3.70549e-05	0.00367631	10	2028836	2030165	+	protein_coding	Solyc10g007830.1.1	Solyc10g007830.1.1.1	101250057	sly:101250057	A0A3Q7IC73	Uncharacterized protein
Solyc01g100460.3	691.592	-1.6412	0.400525	-4.09763	4.17394e-05	0.00406746	1	90360888	90361305	+	protein_coding	Solyc01g100460.3.1	Solyc01g100460.3.1.1	544180	sly:544180	Q6A1K9	Anaerobic basic leucine zipper protein
Solyc10g086760.2	713.228	-1.12948	0.277839	-4.06524	4.79827e-05	0.00463466	10	65606274	65609099	-	protein_coding	Solyc10g086760.2.1	Solyc10g086760.2.1	101252240	sly:101252240	A0A3Q7IPL2	Tubulin beta chain
Solyc07g007760.3	1429.58	-2.06707	0.508814	-4.06252	4.8545e-05	0.00466841	7	2394863	2395702	-	protein_coding	Solyc07g007760.3.1	Solyc07g007760.3.1	101263826	sly:101263826	A0A3Q7H3Y0	Knot1 domain-containing protein
Solyc05g055290.3	57.313	-2.02202	0.498578	-4.05557	5.00132e-05	0.00476778	5	65835261	65839166	-	protein_coding	Solyc05g055290.3.1	Solyc05g055290.3.1	101244873	sly:101244873	A0A3Q7HHE8	Hydrolase_4 domain-containing protein
Solyc03g117640.1	835.097	1.00282	0.247502	4.05174	5.08372e-05	0.00482535	3	68213967	68215185	-	protein_coding	Solyc03g117640.1.1	Solyc03g117640.1.1.1	101255976	sly:101255976	A0A3Q7FU24	Protein kinase domain-containing protein
Solyc09g008970.1	70349.8	1.89012	0.467034	4.04708	5.18615e-05	0.00485946	9	2346452	2346863	+	protein_coding	Solyc09g008970.1.1	Solyc09g008970.1.1.1	101245195	sly:101245195	A0A3Q7HWP0	Uncharacterized protein
Solyc04g007580.1	758.785	2.06696	0.510608	4.04804	5.16481e-05	0.00485946	4	1262146	1262641	+	protein_coding	Solyc04g007580.1.1	Solyc04g007580.1.1.1	101267223	sly:101267223	A0A3Q7GNR2	Uncharacterized protein
Solyc09g075470.2	5073.92	1.27947	0.317539	4.02935	5.59323e-05	0.00519649	9	67597455	67598954	-	protein_coding	Solyc09g075470.2.1	Solyc09g075470.2.1	101264671	sly:101264671	K4CVC4	J domain-containing protein
Solyc09g075950.1	3118.82	1.41648	0.352873	4.01412	5.96685e-05	0.00552022	9	68007119	68008850	+	protein_coding	Solyc09g075950.1.1	Solyc09g075950.1.1.1	101255240	sly:101255240	A0A3Q7I626	Uncharacterized protein
Solyc12g042380.2	17846.5	-1.34806	0.336726	-4.00343	6.24311e-05	0.00572746	12	58502749	58506205	+	protein_coding	Solyc12g042380.2.1	Solyc12g042380.2.1	101252852	sly:101252852	A0A3Q7JVY0	Uncharacterized protein
Solyc06g074030.1	8915.46	1.48451	0.375486	3.95356	7.69965e-05	0.00700509	6	45908246	45909041	-	protein_coding	Solyc06g074030.1.1	Solyc06g074030.1.1.1	101258270	sly:101258270	A0A3Q7HVW3	Poly(A)-specific ribonuclease (EC 3.1.13.4)
Solyc09g061310.3	23227.8	1.07	0.271379	3.94282	8.05299e-05	0.00729628	9	58881277	58884279	+	protein_coding	Solyc09g061310.3.1	Solyc09g061310.3.1	101257806	sly:101257806	A0A3Q7I303	DUF862 domain-containing protein
Solyc10g018190.2	438.518	-1.76508	0.448574	-3.93487	8.32433e-05	0.00751108	10	6904508	6907136	+	protein_coding	Solyc10g018190.2.1	Solyc10g018190.2.1	101246190	sly:101246190	A0A3Q7J8B9	Fe2OG dioxygenase domain-containing protein
Solyc05g007450.3	170.943	-1.87827	0.477656	-3.93228	8.41456e-05	0.00756138	5	2024672	2028050	+	protein_coding	Solyc05g007450.3.1	Solyc05g007450.3.1	101264324	sly:101264324	A0A3Q7GCJ9	Uncharacterized protein
Solyc09g092670.3	41.3933	1.88589	0.479854	3.93012	8.49033e-05	0.00759833	9	72122446	72124714	+	protein_coding	Solyc09g092670.3.1	Solyc09g092670.3.1	101255244	sly:101255244	A0A3Q7IA93	Uncharacterized protein
Solyc07g053610.3	4813.08	1.11313	0.283622	3.9247	8.68378e-05	0.00773986	7	62159206	62177013	+	protein_coding	Solyc07g053610.3.1	Solyc07g053610.3.1	101253299	sly:101253299	A0A3Q7HEL9	Uncharacterized protein
Solyc03g116890.3	5383.1	2.10831	0.538265	3.91686	8.97102e-05	0.00796351	3	67623407	67626540	-	protein_coding	Solyc03g116890.3.1	Solyc03g116890.3.1	101246812	sly:101246812	A0A3Q7GHS3	WRKY domain-containing protein
Solyc09g015770.3	4529.42	2.22813	0.569488	3.91252	9.13387e-05	0.00807537	9	10988361	10990402	-	protein_coding	Solyc09g015770.3.1	Solyc09g015770.3.1	101259967	sly:101259967	I3NN77	WRKY3
Solyc12g098850.2	17026.2	1.02318	0.262832	3.8929	9.90529e-05	0.00868733	12	67213631	67215554	+	protein_coding	Solyc12g098850.2.1	Solyc12g098850.2.1	101251763	sly:101251763	A0A3Q7JYS2	Uncharacterized protein
Solyc09g075440.3	10464.2	1.0105	0.259791	3.88967	0.000100379	0.00876857	9	67559531	67564284	-	protein_coding	Solyc09g075440.3.1	Solyc09g075440.3.1	544279	sly:544279	Q41341	Ethylene receptor (Ethylene receptor neverripe)
Solyc11g020230.1	1766.41	1.68774	0.435469	3.87568	0.00010633	0.00917867	11	10562947	10565284	-	protein_coding	Solyc11g020230.1.1	Solyc11g020230.1.1.1	101250181	sly:101250181	A0A3Q7ITE3	Protein kinase domain-containing protein
Solyc12g014430.2	158.156	-1.37493	0.35541	-3.86858	0.00010947	0.00934698	12	5399612	5407831	-	protein_coding	Solyc12g014430.2.1	Solyc12g014430.2.1	101264405	sly:101264405	A0A3Q7J4Q4	Uncharacterized protein
Solyc02g088090.1	2670.9	2.07604	0.536551	3.86922	0.000109182	0.00934698	2	50916676	50917222	+	protein_coding	Solyc02g088090.1.1	Solyc02g088090.1.1.1	101251639	sly:101251639	A0A3Q7FWP6	Uncharacterized protein
Solyc09g008070.3	555.884	1.82673	0.476224	3.83587	0.000125123	0.0105517	9	1525936	1531119	+	protein_coding	Solyc09g008070.3.1	Solyc09g008070.3.1	101266255	sly:101266255	A0A3Q7ISP8	Uncharacterized protein
Solyc03g096630.1	30.2585	2.15114	0.561827	3.82883	0.000128754	0.0106531	3	60281184	60282489	+	protein_coding	Solyc03g096630.1.1	Solyc03g096630.1.1.1	101260322	sly:101260322	A0A3Q7FMU2	Uncharacterized protein
Solyc11g072630.2	603.399	-1.67026	0.437228	-3.82011	0.000133392	0.0109953	11	56155782	56166404	+	protein_coding	Solyc11g072630.2.1	Solyc11g072630.2.1	100736513	sly:100736513	E2GLN8	Mitogen-activated protein kinase (EC 2.7.11.24)
Solyc03g123550.1	264.556	2.0584	0.541665	3.80014	0.000144614	0.0117437	3	71871024	71871369	-	protein_coding	Solyc03g123550.1.1	Solyc03g123550.1.1.1	101247997	sly:101247997	A0A3Q7FWJ2	Uncharacterized protein
Solyc07g055950.3	2117.53	-1.87913	0.494636	-3.79902	0.000145269	0.0117534	7	63999929	64003090	-	protein_coding	Solyc07g055950.3.1	Solyc07g055950.3.1	101255712	sly:101255712	A0A3Q7HDG6	Uncharacterized protein
Solyc04g077810.1	961.319	-1.07431	0.282965	-3.79661	0.000146685	0.011781	4	62787494	62788235	+	protein_coding	Solyc04g077810.1.1	Solyc04g077810.1.1.1	109120151	sly:109120151	A0A3Q7G672	Uncharacterized protein
Solyc10g005480.3	1159.19	1.10373	0.291031	3.79247	0.000149157	0.0118924	10	351326	352818	-	protein_coding	Solyc10g005480.3.1	Solyc10g005480.3.1	101250166	sly:101250166	A0A3Q7I9L9	Uncharacterized protein
Solyc05g012820.1	397.675	1.33524	0.353408	3.77819	0.000157971	0.0124592	5	5974051	5975026	-	protein_coding	Solyc05g012820.1.1	Solyc05g012820.1.1.1	101254997	sly:101254997	A0A3Q7GFZ2	Uncharacterized protein
Solyc12g088430.1	596.847	1.11227	0.295145	3.76854	0.000164207	0.0127674	12	64792000	64792351	+	protein_coding	Solyc12g088430.1.1	Solyc12g088430.1.1.1	101257452	sly:101257452	A0A3Q7JBQ9	Uncharacterized protein
Solyc03g098030.3	174.728	-1.84879	0.493403	-3.74702	0.000178949	0.0136237	3	61815396	61818316	+	protein_coding	Solyc03g098030.3.1	Solyc03g098030.3.1	101249803	sly:101249803	A0A3Q7FN50	IPPc domain-containing protein
Solyc12g005450.1	505.301	2.0328	0.542641	3.74612	0.000179593	0.0136254	12	270042	271074	+	protein_coding	Solyc12g005450.1.1	Solyc12g005450.1.1.1	101267091	sly:101267091	A0A3Q7J1S2	Protein kinase domain-containing protein
Solyc05g007580.1	890.766	-1.16878	0.312479	-3.74035	0.000183763	0.0138937	5	2120181	2121075	-	protein_coding	Solyc05g007580.1.1	Solyc05g007580.1.1.1	101267309	sly:101267309	A0A3Q7GCL4	ZF-HD dimerization-type domain-containing protein
Solyc05g007710.3	41.4404	-1.99164	0.533304	-3.73453	0.000188063	0.0140733	5	2195281	2197916	-	protein_coding	Solyc05g007710.3.1	Solyc05g007710.3.1	101263026	sly:101263026	A0A3Q7H605	Uncharacterized protein
Solyc06g065820.3	241.745	1.93367	0.518561	3.72892	0.0001923	0.0143414	6	41366305	41367796	-	protein_coding	Solyc06g065820.3.1	Solyc06g065820.3.1	606713	sly:606713	Q8S9H4	Ethylene response factor 1
Solyc10g086410.3	100934	1.05379	0.283776	3.71345	0.000204454	0.0151448	10	65359903	65363233	+	protein_coding	Solyc10g086410.3.1	Solyc10g086410.3.1	101247772	sly:101247772	P27322	Heat shock cognate 70 kDa protein 2
Solyc06g068150.3	33.2297	-2.12941	0.57338	-3.71378	0.000204187	0.0151448	6	42354555	42355715	-	protein_coding	Solyc06g068150.3.1	Solyc06g068150.3.1	101244008	sly:101244008	A0A3Q7GXL8	Uncharacterized protein
Solyc07g053050.1	2826.74	1.23794	0.334223	3.70392	0.000212295	0.0156201	7	61627996	61628347	-	protein_coding	Solyc07g053050.1.1	Solyc07g053050.1.1.1	101266533	sly:101266533	A0A3Q7I8H9	EF-hand domain-containing protein
Solyc10g080880.2	277.591	-1.5238	0.411674	-3.70148	0.000214345	0.0156689	10	62187507	62190950	-	protein_coding	Solyc10g080880.2.1	Solyc10g080880.2.1	100527971	sly:100527971	E5KGD2	Auxin efflux carrier component
Solyc02g091390.3	385.957	2.1188	0.572428	3.70143	0.000214388	0.0156689	2	53322435	53326575	-	protein_coding	Solyc02g091390.3.1	Solyc02g091390.3.1	101258509	sly:101258509	A0A3Q7FAS7	Uncharacterized protein
Solyc03g044860.1	43.5352	2.11715	0.572517	3.69797	0.000217328	0.0157912	3	10721721	10722162	+	protein_coding	Solyc03g044860.1.1	Solyc03g044860.1.1.1	101253064	sly:101253064	A0A3Q7G6D6	Uncharacterized protein
Solyc04g006940.3	257.227	1.82333	0.494481	3.68737	0.000226584	0.0163423	4	625532	631366	-	protein_coding	Solyc04g006940.3.1	Solyc04g006940.3.1	101246336	sly:101246336	A0A3Q7FYP6	Phospholipid-transporting ATPase (EC 7.6.2.1)
Solyc12g041960.2	40.6349	-2.06741	0.564448	-3.66272	0.000249556	0.0176896	12	56633596	56635171	-	protein_coding	Solyc12g041960.2.1	Solyc12g041960.2.1	101265317	sly:101265317	A0A3Q7J949	Uncharacterized protein
Solyc05g054670.3	87.6076	-1.41612	0.386689	-3.66215	0.000250104	0.0176896	5	65382252	65388032	-	protein_coding	Solyc05g054670.3.1	Solyc05g054670.3.1	101259157	sly:101259157	A0A3Q7GMJ8	DDE Tnp4 domain-containing protein
Solyc08g068690.1	5179.18	1.84096	0.503257	3.65809	0.000254101	0.0178801	8	57884152	57884875	-	protein_coding	Solyc08g068690.1.1	Solyc08g068690.1.1.1	101266245	sly:101266245	A0A3Q7HS72	N-acetyltransferase domain-containing protein
Solyc09g008810.3	81.8589	-1.80536	0.494183	-3.65322	0.000258968	0.0180832	9	2224893	2228118	-	protein_coding	Solyc09g008810.3.1	Solyc09g008810.3.1	101264967	sly:101264967	A0A3Q7HWL5	Homeobox domain-containing protein
Solyc11g012980.1	1206.72	2.0035	0.552604	3.62557	0.000288329	0.0195724	11	5825261	5825921	+	protein_coding	Solyc11g012980.1.1	Solyc11g012980.1.1.1	101253047	sly:101253047	A0A3Q7JJV3	AP2/ERF domain-containing protein
Solyc02g086810.1	1445.28	-1.39406	0.384798	-3.62283	0.000291398	0.019659	2	50064091	50064913	+	protein_coding	Solyc02g086810.1.1	Solyc02g086810.1.1.1	101250946	sly:101250946	A0A3Q7FAC6	Uncharacterized protein
Solyc05g013207.1	1970.86	-1.55364	0.43033	-3.61034	0.000305793	0.0204415	5	6280306	6282544	-	protein_coding	Solyc05g013207.1.1	Solyc05g013207.1.1	101262214	sly:101262214	A0A3Q7GF03	3-ketoacyl-CoA synthase (EC 2.3.1.-)
Solyc08g006150.3	12555.2	-1.16181	0.323599	-3.59027	0.000330331	0.02163	8	874809	878200	+	protein_coding	Solyc08g006150.3.1	Solyc08g006150.3.1	101259958	sly:101259958	A0A3Q7IDY3	Gamma-glutamylcyclotransferase (EC 4.3.2.9)
Solyc04g017690.3	27456.6	1.14533	0.319289	3.58711	0.000334367	0.0217048	4	7762012	7764265	-	protein_coding	Solyc04g017690.3.1	Solyc04g017690.3.1	101253770	sly:101253770	A0A3Q7G0V7	PAM2 domain-containing protein
Solyc10g074440.2	376.43	-1.77587	0.496672	-3.57554	0.000349509	0.0226057	10	57974218	57975521	-	protein_coding	Solyc10g074440.2.1	Solyc10g074440.2.1	101251136	sly:101251136	A0A3Q7JDI3	Chitin-binding type-1 domain-containing protein
Solyc04g016440.3	254.378	-1.0938	0.306534	-3.56829	0.000359316	0.0231037	4	7257763	7262851	-	protein_coding	Solyc04g016440.3.1	Solyc04g016440.3.1	101258058	sly:101258058	A0A3Q7GSS5	Uncharacterized protein
Solyc08g082090.1	7400.87	1.11235	0.312109	3.56397	0.000365295	0.0234194	8	65108826	65109318	+	protein_coding	Solyc08g082090.1.1	Solyc08g082090.1.1.1	101261732	sly:101261732	A0A3Q7HWL6	Uncharacterized protein
Solyc01g100210.3	79.4108	-1.75137	0.49359	-3.54823	0.000387833	0.0244511	1	90142988	90144452	-	protein_coding	Solyc01g100210.3.1	Solyc01g100210.3.1	101266460	sly:101266460	A0A3Q7ENK0	Hexosyltransferase (EC 2.4.1.-)
Solyc03g007950.3	97.0383	1.95712	0.551775	3.54695	0.00038972	0.0244842	3	2439224	2442210	-	protein_coding	Solyc03g007950.3.1	Solyc03g007950.3.1	101265512	sly:101265512	A0A3Q7FE04	Uncharacterized protein
Solyc09g072980.2	4280.46	1.02799	0.290938	3.53336	0.000410317	0.0256885	9	66067163	66073433	-	protein_coding	Solyc09g072980.2.1	Solyc09g072980.2.1	101243825	sly:101243825	K4CUX4	Uncharacterized protein
Solyc09g065630.3	348.278	-1.15074	0.325936	-3.53057	0.000414669	0.0258296	9	64028284	64034795	+	protein_coding	Solyc09g065630.3.1	Solyc09g065630.3.1	101265858	sly:101265858	K4CUI9	BIG SEEDS 2
Solyc10g084170.1	3125.17	1.6234	0.461136	3.52043	0.000430844	0.0265356	10	63956433	63956946	+	protein_coding	Solyc10g084170.1.1	Solyc10g084170.1.1.1	101250069	sly:101250069	A0A3Q7IM98	BAG domain-containing protein
Solyc01g110930.1	86.0139	1.42919	0.406292	3.51764	0.000435399	0.0267411	1	97316136	97316388	+	protein_coding	Solyc01g110930.1.1	Solyc01g110930.1.1.1	104645436	sly:104645436	A0A3Q7EU49	Uncharacterized protein
Solyc01g109120.3	1722.8	1.3699	0.391115	3.50254	0.000460844	0.0279721	1	96067218	96069299	-	protein_coding	Solyc01g109120.3.1	Solyc01g109120.3.1	101258501	sly:101258501	A0A3Q7ETC1	WD_REPEATS_REGION domain-containing protein
Solyc11g006230.2	1597.02	-1.88819	0.539292	-3.50124	0.000463097	0.0279721	11	980839	985500	-	protein_coding	Solyc11g006230.2.1	Solyc11g006230.2.1	101253549	sly:101253549	A0A3Q7IQD3	Uncharacterized protein
Solyc02g091180.1	1043.11	1.41573	0.404331	3.50141	0.000462798	0.0279721	2	53203499	53204000	+	protein_coding	Solyc02g091180.1.1	Solyc02g091180.1.1.1	104645686	sly:104645686	A0A3Q7FAD6	Uncharacterized protein
Solyc06g066680.3	278.228	-1.78393	0.512108	-3.4835	0.000494899	0.0298109	6	42011064	42015393	-	protein_coding	Solyc06g066680.3.1	Solyc06g066680.3.1	101247830	sly:101247830	A0A3Q7GWH3	Uncharacterized protein
Solyc03g097410.1	37.6166	1.94484	0.558988	3.47922	0.000502884	0.0301263	3	61172846	61173812	+	protein_coding	Solyc03g097410.1.1	Solyc03g097410.1.1.1	101262094	sly:101262094	A0A3Q7FNC7	Inositol-tetrakisphosphate 1-kinase (EC 2.7.1.134)
Solyc04g078310.3	86.554	-1.83732	0.529338	-3.47098	0.000518559	0.0308128	4	63153153	63155435	+	protein_coding	Solyc04g078310.3.1	Solyc04g078310.3.1	101267520	sly:101267520	A0A3Q7GA39	Cyclin N-terminal domain-containing protein
Solyc12g007020.2	90.5361	-1.69924	0.490671	-3.46309	0.000534012	0.0312233	12	1459014	1462343	+	protein_coding	Solyc12g007020.2.1	Solyc12g007020.2.1	101262597	sly:101262597	A0A3Q7J2A0	Uncharacterized protein
Solyc08g014080.3	1687.71	-1.14048	0.329513	-3.46111	0.000537954	0.0313702	8	3716406	3720845	+	protein_coding	Solyc08g014080.3.1	Solyc08g014080.3.1	101251013	sly:101251013	A0A3Q7HIV9	RING-CH-type domain-containing protein
Solyc11g005770.2	256.945	-1.2008	0.347366	-3.45688	0.000546467	0.031698	11	604751	607515	-	protein_coding	Solyc11g005770.2.1	Solyc11g005770.2.1	101245713	sly:101245713	A0A3Q7IQ29	Pectinesterase (EC 3.1.1.11)
Solyc07g065165.1	185.103	1.87061	0.542178	3.45018	0.00056021	0.0323241	7	67175415	67178000	-	protein_coding	Solyc07g065165.1.1	Solyc07g065165.1.1	101255218	sly:101255218	A0A3Q7HIN1	Uncharacterized protein
Solyc07g064600.3	3125.76	1.48254	0.430259	3.4457	0.000569573	0.0327123	7	66801911	66804745	-	protein_coding	Solyc07g064600.3.1	Solyc07g064600.3.1	101248695	sly:101248695	A0RZD0	Inducible plastid-lipid associated protein
Solyc07g063770.3	363.833	1.39684	0.405518	3.44458	0.000571952	0.0327431	7	66259424	66263241	+	protein_coding	Solyc07g063770.3.1	Solyc07g063770.3.1	104648558	sly:104648558	A0A3Q7HHX3	Receptor-like serine/threonine-protein kinase (EC 2.7.11.1)
Solyc05g007690.2	25.4461	-1.86624	0.544705	-3.42616	0.000612183	0.0345057	5	2182037	2184812	+	protein_coding	Solyc05g007690.2.1	Solyc05g007690.2.1	101262719	sly:101262719	A0A3Q7GDP8	Uncharacterized protein
Solyc02g093250.3	169.195	1.95568	0.571977	3.41915	0.000628163	0.0353157	2	54810024	54811933	-	protein_coding	Solyc02g093250.3.1	Solyc02g093250.3.1	101265690	sly:101265690	A0A3Q7FDU8	Caffeoyl-CoA O-methyltransferase (EC 2.1.1.104)
Solyc02g090970.1	1754.32	1.652	0.484202	3.4118	0.000645348	0.0360048	2	53061907	53062990	+	protein_coding	Solyc02g090970.1.1	Solyc02g090970.1.1.1	101266471	sly:101266471	A0A3Q7FYC8	Protein kinase domain-containing protein
Solyc02g089420.1	98.1632	-1.61424	0.473716	-3.4076	0.000655359	0.0363782	2	51894382	51894925	+	protein_coding	Solyc02g089420.1.1	Solyc02g089420.1.1.1	101260992	sly:101260992	A0A3Q7FXF7	BZIP domain-containing protein
Solyc07g043480.1	1388.65	-1.61641	0.475846	-3.39693	0.000681464	0.0370764	7	57396904	57398275	+	protein_coding	Solyc07g043480.1.1	Solyc07g043480.1.1.1	101254402	sly:101254402	A0A3Q7HCG1	Uncharacterized protein
Solyc12g056410.2	20810.7	1.02672	0.302213	3.39732	0.000680484	0.0370764	12	63292521	63295015	+	protein_coding	Solyc12g056410.2.1	Solyc12g056410.2.1	101266314	sly:101266314	A0A3Q7JBU8	F-box domain-containing protein
Solyc08g068600.3	544.746	1.73588	0.511584	3.39315	0.000690929	0.0374057	8	57794831	57796816	-	protein_coding	Solyc08g068600.3.1	Solyc08g068600.3.1	101264847	sly:101264847	A0A3Q7HPN2	Uncharacterized protein
Solyc09g061760.1	212.974	1.14009	0.336283	3.39026	0.00069826	0.0376725	9	60540171	60542058	+	protein_coding	Solyc09g061760.1.1	Solyc09g061760.1.1.1	101249014	sly:101249014	A0A3Q7IZ64	Uncharacterized protein
Solyc04g058170.1	508.78	1.82319	0.537857	3.38972	0.000699629	0.0376725	4	55200297	55200768	+	protein_coding	Solyc04g058170.1.1	Solyc04g058170.1.1.1	101245247	sly:101245247	A0A3Q7G6F1	Uncharacterized protein
Solyc11g065620.2	4749.99	-1.09022	0.324207	-3.36273	0.000771761	0.0405794	11	51433910	51438753	+	protein_coding	Solyc11g065620.2.1	Solyc11g065620.2.1	101055609	sly:101055609	H6WYS2	Assimilatory sulfite reductase (ferredoxin) (EC 1.8.7.1)
Solyc03g121400.1	1051.25	1.06566	0.318898	3.3417	0.000832674	0.0431613	3	70990361	70990994	-	protein_coding	Solyc03g121400.1.1	Solyc03g121400.1.1.1	101246611	sly:101246611	A0A3Q7FVZ1	Dof-type domain-containing protein
Solyc02g081210.3	423.64	-1.01033	0.303467	-3.3293	0.000870637	0.0448112	2	45815108	45818193	+	protein_coding	Solyc02g081210.3.1	Solyc02g081210.3.1	101268246	sly:101268246	A0A3Q7F653	Expansin
Solyc10g050970.1	106.284	1.64015	0.494489	3.31685	0.000910369	0.0466373	10	51186359	51187031	+	protein_coding	Solyc10g050970.1.1	Solyc10g050970.1.1.1	101246484	sly:101246484	A0A3Q7IGA1	AP2/ERF domain-containing protein
Solyc02g064980.1	135.032	1.63625	0.493672	3.31446	0.000918205	0.0469291	2	36673055	36674135	-	protein_coding	Solyc02g064980.1.1	Solyc02g064980.1.1.1	101266899	sly:101266899	A0A3Q7EZI7	Protein kinase domain-containing protein
Solyc03g006620.3	1578.11	1.53131	0.462554	3.31055	0.000931116	0.0474783	3	1197390	1199002	+	protein_coding	Solyc03g006620.3.1	Solyc03g006620.3.1	101263673	sly:101263673	A0A3Q7FFQ3	DUF4408 domain-containing protein
Solyc01g111980.3	10044.4	1.13974	0.344915	3.30441	0.000951765	0.0482217	1	98029398	98033033	-	protein_coding	Solyc01g111980.3.1	Solyc01g111980.3.1	101250935	sly:101250935	A0A3Q7EWB1	Aa_trans domain-containing protein
Solyc07g008620.1	1757.55	1.8153	0.549209	3.30529	0.000948766	0.0482217	7	3569763	3572859	-	protein_coding	Solyc07g008620.1.1	Solyc07g008620.1.1.1	543900	sly:543900	Q6JN47	Receptor-like protein EIX1 (EIX receptor 1)
Solyc01g111500.3	2258.08	-1.15789	0.35079	-3.30081	0.000964077	0.0483599	1	97633444	97634844	-	protein_coding	Solyc01g111500.3.1	Solyc01g111500.3.1	101263944	sly:101263944	A0A3Q7EUM9	Uncharacterized protein
Solyc09g091960.3	1998.61	1.33146	0.403522	3.29959	0.000968256	0.0483599	9	71633896	71637879	-	protein_coding	Solyc09g091960.3.1	Solyc09g091960.3.1	101265586	sly:101265586	A0A3Q7I9Y8	Uncharacterized protein
Solyc03g114160.1	370.524	1.50161	0.455069	3.29973	0.000967777	0.0483599	3	65660931	65662980	+	protein_coding	Solyc03g114160.1.1	Solyc03g114160.1.1.1	101249811	sly:101249811	A0A3Q7FR76	RING-type E3 ubiquitin transferase (EC 2.3.2.27)
Solyc10g008260.2	27.7853	1.87148	0.567174	3.29965	0.000968042	0.0483599	10	2364946	2366231	-	protein_coding	Solyc10g008260.2.1	Solyc10g008260.2.1	104649466	sly:104649466	A0A3Q7IB62	BHLH domain-containing protein
Solyc12g014480.2	711.953	1.02957	0.312772	3.29175	0.000995651	0.0492791	12	5448805	5455529	-	protein_coding	Solyc12g014480.2.1	Solyc12g014480.2.1	101246405	sly:101246405	A0A3Q7J4R7	Uncharacterized protein
Solyc05g006870.3	515.027	-1.35591	0.412064	-3.29053	0.000999983	0.0493821	5	1484824	1486311	-	protein_coding	Solyc05g006870.3.1	Solyc05g006870.3.1	112940024	sly:112940024	A0A3Q7GE00	Thioredoxin
Solyc01g110800.3	54.6053	1.39523	0.424352	3.28791	0.00100936	0.0496215	1	97262847	97263108	-	protein_coding	Solyc01g110800.3.1	Solyc01g110800.3.1.1	101247761	sly:101247761	A0A3Q7EU24	Uncharacterized protein

## Sheet: DEG Descriptions
Sr. No.	geneID	Description in CoxPathDB	Description in EnSemblPlants
	Upregulated Genes
1	Solyc09g005480.3	putative F-box protein At3g16210	putative F-box protein At3g16210 isoform X4
2	Solyc05g046310.3	uncharacterized LOC101265337	uncharacterized protein LOC101265337
3	Solyc04g079360.1	transcription factor MYB44-like	transcription factor MYB44-like
4	Solyc03g115230.3	chaperone protein ClpB1	chaperone protein ClpB1
5	Solyc03g043700.3	U-box domain-containing protein 4-like	U-box domain-containing protein 4-like isoform X2
6	Solyc08g080540.3	heat stress transcription factor B-2b	heat stress transcription factor B-2b
7	Solyc05g009170.2	zinc finger protein 6	zinc finger protein GIS3
8	Solyc03g118060.3	uncharacterized LOC101246122	uncharacterized protein LOC101246122
9	Solyc03g119390.3	transcription factor BEE 3	transcription factor BEE 3
10	Solyc11g071830.2	dnaJ protein homolog	dnaJ protein homolog
11	Solyc09g015770.3	WRKY transcription factor 81	WRKY transcription factor 81
12	Solyc11g010250.1	uncharacterized LOC101262884	uncharacterized LOC101262884
13	Solyc06g076020.3	Not found	heat shock cognate 70 kDa protein 1
14	Solyc11g066100.2	heat shock cognate 70 kDa protein	heat shock cognate 70 kDa protein
15	Solyc04g078420.1	transcription factor MYB44-like	transcription factor MYB44
16	Solyc03g096630.1	putative ETHYLENE INSENSITIVE 3-like 4 protein	putative ETHYLENE INSENSITIVE 3-like 4 protein
17	Solyc02g091390.3	uncharacterized LOC101258509	uncharacterized LOC101258509
18	Solyc03g044860.1	uncharacterized LOC101253064	uncharacterized protein LOC101253064
19	Solyc03g116890.3	probable WRKY transcription factor 40	probable WRKY transcription factor 40 isoform X1
20	Solyc02g088090.1	probable calcium-binding protein CML30	probable calcium-binding protein CML30
21	Solyc04g007580.1	uncharacterized LOC101267223	uncharacterized protein LOC101267223
22	Solyc02g077670.3	dnaJ protein homolog 1-like	dnaJ protein homolog 1
23	Solyc03g123550.1	uncharacterized LOC101247997	auxin-responsive protein SAUR71
24	Solyc06g071750.3	uncharacterized LOC101267816	uncharacterized protein LOC101267816
25	Solyc12g005450.1	probable receptor-like protein kinase At4g10390	probable receptor-like protein kinase At4g10390
26	Solyc11g012980.1	Not found	ethylene-responsive transcription factor ERF014
27	Solyc02g069260.3	Not found	argonaute 2A
28	Solyc12g009240.1	ethylene-responsive transcription factor ERF017	ethylene-responsive transcription factor ERF017
29	Solyc09g092690.3	70 kDa peptidyl-prolyl isomerase-like	70 kDa peptidyl-prolyl isomerase
30	Solyc03g007950.3	Not found	probable polygalacturonase
31	Solyc02g093250.3	caffeoyl-CoA O-methyltransferase	caffeoyl-CoA O-methyltransferase
32	Solyc05g009340.1	Not found	uncharacterized protein LOC104647284
33	Solyc03g097410.1	inositol-tetrakisphosphate 1-kinase 1-like	inositol-tetrakisphosphate 1-kinase 5-like
34	Solyc12g009000.1	uncharacterized LOC101246112	protein ALP1-like
35	Solyc06g065820.3	ethylene response factor 3-like	ethylene response factor 3-like
36	Solyc05g056560.3	protein OPI10 homolog	protein OPI10 homolog
37	Solyc09g011030.3	hsp70-binding protein 1	hsp70-binding protein 1
38	Solyc09g008970.1	uncharacterized LOC101245195	uncharacterized protein LOC101245195
39	Solyc12g096570.1	Not found	ARGOS
40	Solyc09g092670.3	cytochrome P450 83B1-like	cytochrome P450 83B1
41	Solyc10g008260.2	Not found	transcription factor bHLH162-like
42	Solyc07g065165.1	Not found	pirin-like protein At1g50590
43	Solyc09g059950.3	uncharacterized LOC101254127	uncharacterized protein LOC101254127
44	Solyc08g068690.1	tyramine N-feruloyltransferase 4/11-like	tyramine N-feruloyltransferase 4/11
45	Solyc09g008070.3	cell division cycle protein 48 homolog	cell division cycle protein 48 homolog
46	Solyc04g006940.3	putative phospholipid-transporting ATPase 9	putative phospholipid-transporting ATPase 9
47	Solyc04g058170.1	probable calcium-binding protein CML44	probable calcium-binding protein CML44
48	Solyc07g008620.1	Not found	receptor-like protein EIX1 precursor
49	Solyc09g005120.3	dnaJ protein ERDJ3A	dnaJ protein ERDJ3A
50	Solyc08g068600.3	histidine decarboxylase-like	histidine decarboxylase-like
51	Solyc07g040960.1	Not found	salt responsive protein 2
52	Solyc09g011170.3	Not found	Prf interactor 30137
53	Solyc03g120090.1	probable pyridoxal biosynthesis protein PDX1.2	pyridoxal 5'-phosphate synthase-like subunit PDX1.2
54	Solyc11g020230.1	serine/threonine-protein kinase-like protein CCR4	serine/threonine-protein kinase-like protein CCR4
55	Solyc06g049020.1	uncharacterized LOC101254906	uncharacterized protein LOC101254906
56	Solyc03g093610.1	Not found	ethylene-responsive transcription factor 1
57	Solyc02g082060.2	deSI-like protein At4g17486	deSI-like protein At4g17486
58	Solyc02g090970.1	mitogen-activated protein kinase kinase kinase NPK1-like	mitogen-activated protein kinase kinase kinase 17-like
59	Solyc10g050970.1	ethylene-responsive transcription factor ERF109-like	ethylene-responsive transcription factor ERF109-like
60	Solyc02g064980.1	mitogen-activated protein kinase kinase kinase 1-like	mitogen-activated protein kinase kinase kinase 18-like
61	Solyc10g084170.1	BAG family molecular chaperone regulator 5, mitochondrial-like	BAG family molecular chaperone regulator 5, mitochondrial-like
62	Solyc08g082960.3	zinc finger HIT domain-containing protein 2	zinc finger HIT domain-containing protein 2
63	Solyc01g111970.3	L-ascorbate oxidase homolog	L-ascorbate oxidase homolog
64	Solyc03g006620.3	uncharacterized LOC101263673	uncharacterized protein LOC101263673
65	Solyc11g012510.2	Not found	GRAS1 protein
66	Solyc03g114160.1	U-box domain-containing protein 19-like	U-box domain-containing protein 19-like
67	Solyc02g090990.1	mitogen-activated protein kinase kinase kinase NPK1-like	mitogen-activated protein kinase kinase kinase 17-like
68	Solyc06g074030.1	probable CCR4-associated factor 1 homolog 9	probable CCR4-associated factor 1 homolog 9
69	Solyc07g064600.3	inducible plastid-lipid associated protein	inducible plastid-lipid associated protein
70	Solyc05g052520.3	putative protein phosphatase 2C 53	putative protein phosphatase 2C 53
71	Solyc01g110930.1	Not found	auxin-responsive protein SAUR21-like
72	Solyc09g075950.1	heat shock 70 kDa protein 8	heat shock 70 kDa protein 8
73	Solyc02g091180.1	Not found	uncharacterized protein LOC104645686
74	Solyc07g063770.3	Not found	G-type lectin S-receptor-like serine/threonine-protein kinase At4g27290 isoform X1
75	Solyc08g074960.3	uncharacterized LOC101262446	protein NUCLEAR FUSION DEFECTIVE 4
76	Solyc01g110800.3	auxin-induced protein 15A-like	auxin-induced protein 15A-like
77	Solyc01g109120.3	myosin heavy chain kinase B	protein JINGUBANG
78	Solyc09g056450.3	U-box domain-containing protein 9	U-box domain-containing protein 9
79	Solyc04g014600.3	universal stress protein A-like protein	universal stress protein PHOS32
80	Solyc05g012820.1	Not found	uncharacterized protein LOC101254997/uncharacterized protein LOC101256182
81	Solyc04g076340.3	uncharacterized LOC101255390	uncharacterized protein LOC101255390
82	Solyc09g091960.3	high mobility group B protein 15	high mobility group B protein 15
83	Solyc01g110920.3	Not found	auxin-induced protein 15A-like
84	Solyc03g083350.3	phosphatidylinositol 4-kinase gamma 3	phosphatidylinositol 4-kinase gamma 3
85	Solyc09g075470.2	dnaJ homolog subfamily B member 6-like	dnaJ homolog subfamily B member 6-like
86	Solyc04g072900.1	dehydration-responsive element binding protein 3	dehydration-responsive element binding protein 3
87	Solyc03g112310.1	clade X lectin receptor kinase	clade X lectin receptor kinase
88	Solyc04g076970.3	transcription factor HBP-1b(c38)	protein DOG1-like 4
89	Solyc07g053050.1	calcium-binding protein PBP1-like	calcium-binding protein KRP1
90	Solyc10g006130.1	ethylene-responsive transcription factor 3-like	ethylene-responsive transcription factor 3
91	Solyc10g085590.1	Not found	protein ELC-like
92	Solyc10g078930.2	activator of 90 kDa heat shock protein ATPase homolog	activator of 90 kDa heat shock protein ATPase homolog
93	Solyc07g054760.1	uncharacterized LOC101254813	uncharacterized protein LOC101254813
94	Solyc08g076930.1	Not found	transcription factor MYC2
95	Solyc04g017690.3	Not found	protein EARLY RESPONSIVE TO DEHYDRATION 15
96	Solyc09g061760.1	pentatricopeptide repeat-containing protein At2g17525, mitochondrial	pentatricopeptide repeat-containing protein At2g17525, mitochondrial
97	Solyc01g111980.3	lysine histidine transporter-like 8	lysine histidine transporter-like 8
98	Solyc08g006980.3	MND1-interacting protein 1-like	MND1-interacting protein 1-like
99	Solyc07g053610.3	uncharacterized LOC101253299	homeobox-DDT domain protein RLT2
100	Solyc08g082090.1	uncharacterized LOC101261732	uncharacterized protein LOC101261732
101	Solyc12g088430.1	uncharacterized LOC101257452	uncharacterized protein LOC101257452
102	Solyc10g005480.3	F-box protein SKIP27	F-box protein SKIP27
103	Solyc02g065050.1	aspartic proteinase PCS1-like	aspartic proteinase PCS1-like
104	Solyc12g049560.2	ethylene-responsive transcription factor RAP2-12	ethylene-responsive transcription factor RAP2-12
105	Solyc09g061310.3	desumoylating isopeptidase 1	desumoylating isopeptidase 1
106	Solyc03g121400.1	dof zinc finger protein DOF3.1-like	dof zinc finger protein DOF3.1	Upregulated Genes
107	Solyc04g063380.3	F-box protein SKP2B-like	F-box protein SKP2B
108	Solyc10g086410.3	heat shock cognate 70 kDa protein 2	heat shock cognate 70 kDa protein 2
109	Solyc12g014480.2	uncharacterized LOC101246405	uncharacterized protein LOC101246405 isoform X2
110	Solyc09g072980.2	Not found	BTB/POZ and MATH domain-containing protein 2-like
111	Solyc12g056410.2	F-box protein PP2-A13-like	F-box protein PP2-A13-like
112	Solyc12g098850.2	UPF0396 protein CG6066	diacylglycerol O-acyltransferase 3, cytosolic
113	Solyc03g113100.3	Not found	ubiquitin-conjugating enzyme E2 2
114	Solyc09g075440.3	ethylene receptor	ethylene receptor neverripe isoform X1
115	Solyc03g117640.1	mitogen-activated protein kinase kinase kinase YODA-like	mitogen-activated protein kinase kinase kinase 17-like
	Downregulated Genes
116	Solyc02g081210.3	expansin-A13-like	expansin-A13-like
117	Solyc04g077810.1	Not found	uncharacterized protein LOC109120151
118	Solyc11g065620.2	sulfite reductase	sulfite reductase
119	Solyc09g097970.3	Not found	auxin-induced protein PCNT115-like
120	Solyc04g016440.3	uncharacterized LOC101258058	protein FATTY ACID EXPORT 1, chloroplastic isoform X1
121	Solyc10g086760.2	tubulin beta-2 chain-like	tubulin beta-5 chain
122	Solyc08g014080.3	uncharacterized LOC101251013	uncharacterized protein LOC101251013 isoform X2
123	Solyc09g065630.3	protein TIFY 4B	protein TIFY 4B isoform X2
124	Solyc01g111500.3	myb-related protein 308-like	myb-related protein 308
125	Solyc08g006150.3	cation transport regulator-like protein 2	gamma-glutamylcyclotransferase 2-1
126	Solyc09g098170.3	ras-related protein RABA5e-like	ras-related protein RABA5e
127	Solyc05g007580.1	zinc-finger homeodomain protein 10-like	zinc-finger homeodomain protein 10
128	Solyc11g005770.2	plant invertase/pectin methylesterase inhibitor superfamily	pectinesterase family protein
129	Solyc01g086650.3	uroporphyrinogen-III C-methyltransferase	uncharacterized protein LOC101261158
130	Solyc05g056330.3	uncharacterized LOC101259339	uncharacterized protein LOC101259339
131	Solyc07g007800.3	heptahelical transmembrane protein 1	heptahelical transmembrane protein 1
132	Solyc02g082850.3	serine acetyltransferase 2-like	serine acetyltransferase 2
133	Solyc12g042380.2	uncharacterized LOC101252852	uncharacterized protein LOC101252852
134	Solyc07g017610.3	alpha-aminoadipic semialdehyde synthase	alpha-aminoadipic semialdehyde synthase
135	Solyc05g006870.3	thioredoxin H4	thioredoxin H4-like
136	Solyc01g094010.3	alpha/beta-hydrolases superfamily protein	alpha/beta-hydrolases superfamily protein
137	Solyc12g014430.2	cellulose synthase-like protein G3	cellulose synthase-like protein G3
138	Solyc02g086810.1	uncharacterized LOC101250946	uncharacterized protein LOC101250946
139	Solyc10g055410.2	transcription factor	transcription factor
140	Solyc12g044420.1	uncharacterized LOC101247111	uncharacterized protein LOC101247111
141	Solyc05g054670.3	putative nuclease HARBI1	protein ALP1-like
142	Solyc02g080530.3	peroxidase 42-like	peroxidase 42
143	Solyc08g079480.3	uncharacterized LOC101265157	uncharacterized protein LOC101265157
144	Solyc07g065980.3	Not found	alkaline alpha-galactosidase seed imbibition protein
145	Solyc10g080880.2	auxin efflux facilitator SlPIN7	auxin efflux facilitator SlPIN7
146	Solyc05g013207.1	Not found	3-ketoacyl-CoA synthase 20
147	Solyc11g010380.2	protein TRANSPARENT TESTA 12-like	protein DETOXIFICATION 27
148	Solyc02g089420.1	Not found	basic leucine zipper 43
149	Solyc08g081040.3	uncharacterized LOC101259063	uncharacterized protein LOC101259063
150	Solyc07g043480.1	zeatin O-xylosyltransferase-like	zeatin O-xylosyltransferase
151	Solyc02g083860.3	flavanone 3 beta-hydroxylase	flavanone 3-dioxygenase
152	Solyc06g065340.1	uncharacterized LOC101251995	uncharacterized protein LOC101251995
153	Solyc01g100460.3	anaerobic basic leucine zipper protein	anaerobic basic leucine zipper protein
154	Solyc11g072630.2	mitogen-activated protein kinase 4	mitogen-activated protein kinase 4
155	Solyc03g120310.3	uncharacterized LOC101247116	uncharacterized protein LOC101247116
156	Solyc12g007020.2	uncharacterized LOC101262597	uncharacterized protein LOC101262597
157	Solyc09g009150.1	Not found	PAN domain-containing protein At5g03700
158	Solyc01g100210.3	probable galacturonosyltransferase-like 7	probable galacturonosyltransferase-like 7
159	Solyc10g018190.2	hyoscyamine 6-dioxygenase-like	hyoscyamine 6-dioxygenase-like
160	Solyc09g009840.1	Not found	uncharacterized protein LOC101254416
161	Solyc10g074440.2	endochitinase	endochitinase
162	Solyc06g066680.3	mitochondrial arginine transporter BAC2-like	mitochondrial arginine transporter BAC2-like
163	Solyc09g008810.3	putative homeobox-leucine zipper protein ATHB-51	putative homeobox-leucine zipper protein ATHB-51
164	Solyc12g013690.2	zeaxanthin epoxidase, chloroplastic-like	monooxygenase 2
165	Solyc04g078310.3	putative cyclin-A3-1	putative cyclin-A3-1
166	Solyc01g081210.3	F-box/kelch-repeat protein SKIP25-like	F-box/kelch-repeat protein SKIP25-like
167	Solyc03g118970.3	MATE efflux family protein 5	protein DETOXIFICATION 16
168	Solyc03g098030.3	type I inositol 1,4,5-trisphosphate 5-phosphatase CVP2-like	type IV inositol polyphosphate 5-phosphatase 9-like isoform X2
169	Solyc08g080860.3	uncharacterized LOC101261438	uncharacterized protein LOC101261438
170	Solyc05g007690.2	myb-related protein Hv1-like	transcription factor MYB106-like
171	Solyc01g095620.3	hydroquinone glucosyltransferase	hydroquinone glucosyltransferase
172	Solyc05g007450.3	origin recognition complex subunit 6	origin of replication complex subunit 6
173	Solyc07g055950.3	protodermal factor 1	protodermal factor 1
174	Solyc11g006230.2	GRF1-interacting factor 1-like	GRF1-interacting factor 1
175	Solyc02g086770.3	cinnamoyl-CoA reductase 1	cinnamoyl-CoA reductase-like SNL6
176	Solyc03g120330.1	F-box/kelch-repeat protein At1g80440-like	F-box/kelch-repeat protein At1g80440-like
177	Solyc08g006690.1	Not found	pectinesterase inhibitor 6-like
178	Solyc03g117270.1	F-box protein At5g07610-like	F-box protein At5g07610
179	Solyc05g007710.3	transcription factor MYB51-like	transcription factor MYB106-like
180	Solyc05g055290.3	uncharacterized LOC101244873	uncharacterized protein LOC101244873
181	Solyc07g007760.3	defensin-like protein P322	defensin-like protein precursor
182	Solyc12g041960.2	trans-resveratrol di-O-methyltransferase-like	trans-resveratrol di-O-methyltransferase-like
183	Solyc10g048190.1	thymocyte nuclear protein 1	thymocyte nuclear protein 1
184	Solyc06g068150.3	phosphatidylcholine:diacylglycerol cholinephosphotransferase 1-like	phosphatidylcholine:diacylglycerol cholinephosphotransferase 1-like
185	Solyc05g012630.1	putative pentatricopeptide repeat-containing protein At1g69350, mitochondrial	putative pentatricopeptide repeat-containing protein At1g69350, mitochondrial
186	Solyc01g094020.3	receptor-like serine/threonine-protein kinase At2g45590	receptor-like serine/threonine-protein kinase At2g45590
187	Solyc08g075240.3	long-chain-alcohol oxidase FAO4A-like	long-chain-alcohol oxidase FAO4A-like
188	Solyc03g020030.3	Not found	proteinase inhibitor type-2-like
189	Solyc12g042600.2	UDP-glycosyltransferase 73C1-like	UDP-glycosyltransferase 73C1
190	Solyc10g052880.1	probably inactive leucine-rich repeat receptor-like protein kinase At2g25790	receptor-like protein 33
191	Solyc10g007830.1	protein TOO MANY MOUTHS	receptor like protein 29
192	Solyc08g006410.3	UDP-glycosyltransferase 74F1-like	UDP-glycosyltransferase 74G1-like isoform X1
193	Solyc03g114960.3	kelch domain-containing protein 3-like	ABC transporter B family member 25
194	Solyc06g072230.1	miraculin-like	kunitz trypsin inhibitor 2
195	Solyc12g005850.2	protein TRANSPARENT TESTA 12	protein DETOXIFICATION 40
196	Solyc06g072220.1	miraculin-like	kunitz trypsin inhibitor 2-like
197	Solyc06g054670.2	acyl-[acyl-carrier-protein] desaturase 6, chloroplastic-like	stearoyl-[acyl-carrier-protein] 9-desaturase 6, chloroplastic-like
198	Solyc04g014260.2	zinc-finger homeodomain protein 2-like	zinc-finger homeodomain protein 2-like
199	Solyc05g051660.1	acylsugar acylhydrolase 1	acylsugar acylhydrolase 1
200	Solyc04g007310.2	thaumatin-like protein 1b	thaumatin-like protein 1b
201	Solyc01g080010.2	Not found	xyloglucan-specific fungal endoglucanase inhibitor protein precursor
202	Solyc09g065800.3	3-ketoacyl-CoA synthase 11-like	3-ketoacyl-CoA synthase 11-like
203	Solyc05g052130.3	metacaspase-1-like	metacaspase-1-like
204	Solyc04g014520.1	transmembrane protein 45B-like	transmembrane protein 45B-like
205	Solyc10g083690.3	cytochrome P450 76A2-like	cytochrome P450 76A2-like
206	Solyc12g014010.2	UDP-glucose flavonoid 3-O-glucosyltransferase 6-like	UDP-glucose flavonoid 3-O-glucosyltransferase 6
207	Solyc03g020010.1	miraculin	miraculin precursor
208	Solyc02g094040.3	Not found	triacylglycerol lipase 2-like
209	Solyc10g079380.2	heat stress transcription factor B-3-like	heat stress transcription factor B-3-like
210	Solyc10g085870.1	UDP-glycosyltransferase 73C3-like	UDP-glycosyltransferase 73C3-like
211	Solyc06g008620.1	uncharacterized LOC101247825	uncharacterized protein LOC101247825
