# Supplementary material for: β-Cyclocitral, a Master Regulator of Multiple Stress-Responsive Genes in Solanum lycopersicum L. Plants
Source: Plants (Basel). 2021 Nov 15;10(11):2465. doi: 10.3390/plants10112465 (PMC8618229; doi:10.3390/plants10112465)
Supplement: Supplementary file 1 [file plants-10-02465-s001.zip › Supplemental Data S2.xlsx]

## Sheet: GO annotations
					GO annotations of genes differentially expresses in response to exogenous βCC treatment
GeneID	UniProt ID		Biological process					Cellular component				Molecular functions
Solyc06g008620.1	A0A3Q7GN27		NA					NA				NA
Solyc05g046310.3	A0A3Q7HDY9		NA					NA				NA
Solyc12g005850.2	A0A3Q7JR91		Drug transmembrane transport, Transmembrane transport					Integral component of membrane, Membrane				Antiporter activity, Transmembrane transporter activity, Xenobiotic transmembrane transporter activity
Solyc10g085870.1	A0A3Q7IN36		NA					Nucleus, Cytoplasm, Intracellular membrane bound organelle				UDP glycosyltransferase activity, Transferse activity, Transferase activity; transferring glycosyl groups, Quercetin 3-O- glucosyltransferase activity, Quercetin 7-O-glucosyltransferase activity
Solyc10g052880.1	A0A3Q7IGR5		NA					Plasma membrane				Protein binding
Solyc02g094040.3	A0A3Q7FC39		Lipid catabolic process, Lipid metabolic process, Cellular lipid metabolic process					NA				Lipase activity, Hydrolase activity; acting on ester bonds
Solyc05g056560.3	A0A3Q7HI65		Protein import into nucleus					Cytosol,Nucleus				Nuclear import signal receptor activity
Solyc03g120310.3	A0A3Q7GKD4		NA					Intergral component of membrane				Transferase activity, transferring glycosyl groups
Solyc04g078420.1	A0A3Q7GA52		Regulation of transcription, DNA-templated					Nucleus				DNA binding transcription factor activity; RNA polymerase 2 specific, DNA binding, RNA polymerase 2 cis-regulatoryregion sequence-specific DNA binding
Solyc03g115230.3	A0A3Q7FQU3		Cellular response to heat, Response to unfolded protein, Protein metabolic process					Cytoplasm				ATPase activity, ATP binding
Solyc06g076020.3	A0A3Q7H3P6		Cellular response to unfolded protein, Chaperone cofactor-dependant protein refolding, Protein refolding, Response to unfolded protein, Cellular response to heat					Cytoplasm				ATPase activity, ATP binding, Heat shock protein binding, Misfolded protein binding, Protein folding chaperone, Unfolded protein binding, Nucleotide binding, ATPase activity; coupled
Solyc05g051660.1	K4C1J7		Catabolic process					NA				Hydrolase activity
Solyc09g092690.3	A0A3Q7I8W5		Chaperone-mediated protein folding, Protein peptidyl prolyl isomerisation					Cytoplasm				Peptidyl-prolyl cis-trans isomerase activity, Protein binding, FK506 binding
Solyc02g077670.3	A0A3Q7F3P7		Chaperone cofactor-dependant protein refolding					Cytosol				Chaperone binding, Unfolded protein binding
Solyc12g014010.2	A0A3Q7J5C5		NA					Intracellular membrane bounded organelle				UDP-glycosyltransferase activity, Transferase activity; transferring hexosyl groups
Solyc12g013690.2	A0A3Q7J492		NA					Integral component of membrane				FAD binding
Solyc09g005480.3	A0A3Q7HVU4		NA					NA				Protein binding
Solyc05g009340.1	A0A3Q7GDG3		NA					NA				NA
Solyc02g086770.3	A0A3Q7F873		Steroid biosynthetic process, Oxidation-reduction process					NA				3-beta-hydroxy-delta-5-steroid dehydrogenase activity, Oxidoreductase activity, Oxidoreductase activity; acting on CH-OH group of donors, NAD or NADP as acceptor
Solyc12g009240.1	A0A3Q7J3S7		Defense response, Transcription;DNA templated, Regulation of transription; DNA templated					Nucleus				DNA binding, DNA binding transcription factor activity
Solyc10g083690.3	A0A3Q7IMV1		Oxidation-reduction process					Integral component of membrane, Membrane				Heme binding, Iron ion binding, Monooxygenase activity, Oxidoreductase activity; acting on paired donors; with incorporation or reduction of molecular oxygen, Oxidoreductase activity; acting on paired donors; with incorporation or reduction of molecular oxygen; NAD(P)H as one donor; and incorporation of one atom of oxygen
Solyc04g079360.1	A0A3Q7H2B0		Regulation of transcription; DNA templated					NUCLEUS ???????				DNA binding transcription factor activity; RNA polymerase 2 specific, RNA polymerase 2 cis-regulatory region sequence-specific DNA binding, DNA binding
Solyc06g072220.1	A0A3Q7GYL5		NA					NA				Endopeptidase inhibitor activity
Solyc03g118970.3	A0A3Q7FW04		Drug transmembrane transport, Transmembrane transport					Integral component of membrane, Membrane				Antiporter activity, Transmembrane transporter activity, Xenobiotic transmembrane transporter activity
Solyc10g079380.2	A0A3Q7IK60		Regulation of transcription by RNA polymerase 2, Regulation of transcription; DNA templated, Cellular response to heat, Positive regulation of transcription from RNA polymerase 2 promotor in response to heat stress					Nucleus				DNA binding transcription factor activity, RNA polymerase 2 cis-regulatory region sequence-specific DNA binding, Sequence-specific DNA binding, RNA polymerase 2 proximal promotor sequence-specific DNA binding
Solyc03g043700.3	A0A3Q7FJ51		NA					Nucleus, Cytoplasm, Intracellular membrane bound organelle				Protein binding
Solyc03g093610.1	Q84XB3		Defense response, Ethylene activated signalling pathway, Fruit ripening					Nucleus				DNA binding, DNA binding transcription factor activity
Solyc09g011170.3	A0A3Q7I026		Regulation of transcription; DNA templated					Nucleus				DNA binding transcription factor activity,Protein dimerisation activity
Solyc06g072230.1	A0A3Q7GZA3		NA					NA				Endopeptidase inhibitor activity
Solyc11g066100.2	A0A3Q7IYI9		Cellular response to unfolded protein, Cellular response to heat, Chaperone cofactor-dependant protein refolding, Protein refolding, Response to unfolded protein					Cytoplasm				ATPase activity, ATP binding, Heat shock protein binding, Misfolded protein binding, Protein folding chaperone, Unfolded protein binding, ATPase activity; coupled
Solyc03g020010.1	O48625		Negative regulation of peptidase activity, Negative regulation of endopeptidase activity					NA				Endopeptidase inhibitor activity, Peptidase inhbitor activity
Solyc08g081040.3	A0A3Q7HW13		NA					NA				NA
Solyc03g114960.3	A0A3Q7FSS8		Transmembrane transport					Integral component of membrane				ATPase activity, ATPase coupled transmembrane transporter activity, ATP binding
Solyc07g054760.1	A0A3Q7HFT4		NA					NA				NA
Solyc09g059950.3	A0A3Q7I2D6		NA					NA				NA
Solyc04g014520.1	A0A3Q7FZR2		NA					Integral component of membrane				NA
Solyc10g055410.2	Q43525		Cell differentiation, Regulation of transcription; DNA templated					Nucleus				Sequence-specific DNA binding, Transcription regulatory region sequence-specific DNA binding, DNA binding, DNA-binding transcription factor activity
Solyc05g052130.3	A0A3Q7GNR8		NA					NA				Cysteine-type endopeptidase activity
Solyc03g120090.1	A0A3Q7FUW9		Cellular amino acid metabolic process, Pyridoxal phosphate biosynthetic process, Pyridoxine biosynthetic process, Vitamin B6 biosynthetic process					Cytosol				Amine-lyase activity, Catalytic activity, Protein heterodimerisation activity
Solyc08g079480.3	A0A3Q7HSS8		NA					NA				NA
Solyc06g054670.2	A0A3Q7GTC9		Fatty acid biosynthetic process, Fatty acid metabolic process, Oxidation-reduction process					Plastid, Chloroplast stroma				Acyl-[acyl-carrier-protein] desaturase activity, Metal ion binding, Oxidoreductase activity
Solyc05g012630.1	A0A3Q7GGS5		RNA modification					NA				Protein binding
Solyc08g080540.3	A0A3Q7HTF6		Regulation of transcription by RNA polymerase 2, Regulation of transcription; DNA templated, Cellular response to heat, Positive regulation of transcription from RNA polymerase 2 promotor in response to heat stress					Nucleus				DNA binding transcription factor activity, RNA polymerase 2 cis-regulatory region sequence-specific DNA binding, Sequence-specific DNA binding, RNA polymerase 2 proximal promotor sequence-specific DNA binding
Solyc11g010250.1	A0A3Q7IQN6		NA					NA				NA
Solyc01g080010.2	A0A3Q7EHP2		Proteolysis, Protein catabolic process					NA				Aspartic-type endopeptidase activity
Solyc09g065800.3	A0A3Q7I657		Fatty acid biosynthetic process					Integral component of membrane, Membrane				3-Oxo-arachidoyl-CoA synthase activity, 3-Oxo-cerotoyl-CoA synthase activity, 3-Oxo-lignoceronyl-CoA synthase activity, Very-long-chain 3-ketoacyl-CoA synthase activity, Transferase activity; transferring acyl groups, Transferase activity; transferring acyl groups other than amino-acyl groups, Catalytic activity
Solyc10g078930.2	A0A3Q7IJV9		Positive regulation of ATPase activity, Protein folding					Cytosol				ATPase activator activity, Chaperone binding, Hsp90 protein binding
Solyc11g012510.2	A0A3Q7IRV0		Regulation of transcription; DNA templated					Nucleus				DNA binding transcription factor activity, Sequence-specific DNA binding
Solyc09g005120.3	A0A3Q7HXF0		Response to heat, Pollen tube growth					Endoplasmic reticulum lumen, Plasmodesma				Oxidoreductase activity
Solyc06g071750.3	A0A3Q7GZ15		NA					NA				Protein binding
Solyc09g009150.1	A0A3Q7HYY7		Recognition of pollen					Integral component of membrane, Membrane, Endosome, Trans-golgi network, Plasma membrane				NA
Solyc08g082960.3	A0A3Q7HUS6		NA					NA				Metal ion binding
Solyc07g040960.1	A0A3Q7HBL3		NA					NA				Metal ion binding
Solyc09g011030.3	A0A3Q7HXU3		NA					Endoplasmic reticulum, Cytoplasm				Adenyl-nucleotide exchang factor activity
Solyc01g081210.3	A0A3Q7EIG0		NA					NA				Protein binding
Solyc02g080530.3	A0A3Q7F5S0		Hydrogen peroxide catabolic process, Response to oxidative stress, Response to oxidative stress					Plant-type cell wall, Extracellular region, Plasmodesma				Heme binding, Metal ion binding, Peroxidase activity
Solyc06g049020.1	A0A3Q7GRC5		NA					NA				NA
Solyc09g056450.3	A0A3Q7I3N4		Protein ubiquitination					Nucleus, Cytoplasm				Ubiquitin-protein transferase activity, Protein binding
Solyc11g071830.2	A0A3Q7J0I4		Protein folding, Response to heat					Cytosol				ATP binding, Heat shock protein binding, Metal ion binding, Unfolded protein binding
Solyc08g006410.3	A0A3Q7IE23		NA					Intracellular membrane bounded organelle				Quercetin 3-O-glucosyltransferase activity, Quercetin 7-O-glucosyltransferase activity, UDP-glycosyltransferase activity, Transferse activity; transferring hexosyl group
Solyc08g080860.3	A0A3Q7HTL2		NA					NA				NA
Solyc10g085590.1	A0A3Q7JGU6		Cellular protein modification process, Protein transport					Endosome				NA
Solyc11g010380.2	A0A3Q7IRY2		Drug transmembrane transport, Transmembrane transport					Membrane,integral component of membrane				Antiporter activity, Transmembrane transporter activity, Xenobiotic transmembrane transporter activity
Solyc03g083350.3	A0A3Q7FKV7		NA					NA				Protein binding, Kinase activity
Solyc01g095620.3	D7S016		NA					Intracellular membrane bounded organelle				UDP-glycosyltransferase activity, Transferase activity; transferring hexosyl groups, Transferase activity, Quercetin 3-O-glucosyltransferase activity, Quercetin 7-O-glucosyltransferase activity, Transferase activity; transferring glycosyl groups
Solyc08g075240.3	A0A3Q7IM21		Oxidation-reduction process					Integral component of membrane				Flavin adenine dinucleotide binding, Long-chain-alcohol oxidase activity, Oxidoreductase activity; acting on CH-OH group of donors.
Solyc02g069260.3	K4B7Q8		Gene silencing by RNA					NA				Nucleic acid binding, Protein binding
Solyc04g007310.2	A0A3Q7GNK5		Defense response					Extracellular region				NA
Solyc09g009840.1	A0A3Q7HX70		NA					NA				NA
Solyc03g113100.3	K4BKG3		DNA repair, Histone ubiquitination, Proteasome-mediated ubiquitin-dependant protein catabolic process, Protein polyubiquitination					Cytoplasm				ATP binding, Uniquitin conjugating enzyme activity, Nucleotide binding, Transferase activity
Solyc05g052520.3	A0A3Q7GLI8		Protein dephosphorylation, Abscisic acid-activated signaling pathway, Stomatal lineage progression					Nucleus				Magnesium-dependant protein serine/threonine phosphatase activity, Metal ion binding, Protein serine/threonine phosphatase activity, Protein serine phosphatase activity, Protein threonine phosphatase activity, Phosphatase activity, Catalytic activity, Cation binding
Solyc04g014600.3	A0A3Q7FXR6		NA					Cytoplasm, Plasma membrane				Protein self-association
Solyc08g074960.3	A0A3Q7HSU6		Phosphate ion transport					Integral component of membrane, Membrane				NA
Solyc03g117270.1	A0A3Q7FT50		NA					NA				Protein binding
Solyc04g014260.2	A0A3Q7FZL4		Regulation of transcription; DNA templated					Nucleus				DNA-binding transcription factor activity, Transcription regulatory region sequence-specific DNA binding, DNA binding
Solyc01g094020.3	A0A3Q7EKX9		Protein phosphorylation					Integral component of membrane, Plasma membrane				ATP binding, Protein kinase activity, Protein Ser/Thr kinase activity
Solyc01g086650.3	A0A3Q7EIN5		Methylation, Oxidation-reduction process, Siroheme biosynthetic process					Chloroplast				Uroporphyrin – 3 C – methyltransferase activity, Methyltransferase activity
Solyc02g083860.3	A0A3Q7F6V7		Flavonoid biosynthetic process, Response to UV-B, Oxidation-reduction process					NA				L-Ascorbic acid binding, Metal ion binding, Oxidoreductase activity, Naringenin-3-dioxygenase activity, Dioxygenase activity
Solyc12g009000.1	A0A3Q7JS08		NA					NA				Metal ion binding
Solyc07g007800.3	A0A3Q7H7L9		Response to hormone					Integral component of membrane				Signaling receptor activity
Solyc04g076970.3	A0A3Q7G895		Transcription; DNA templated					NA				Sequence-specific DNA binding
Solyc12g049560.2	A0A3Q7JAJ2		Defense response, Transcription; DNA templated, Regulation of transcription; DNA templated					Nucleus				DNA binding, DNA binding transcription factor activity
Solyc04g063380.3	A0A3Q7G362		SCF-dependant proteasomal uniquitin-dependant protein catabolic process, Ubiquitin-dependant protein catabolic process, Protein ubiquitination					NA				Protein binding
Solyc01g110920.3	A0A3Q7EUC1		Response to auxin					NA				NA
Solyc09g098170.3	A0A3Q7I8Y6		Intracellular protein transport, RAB protein signal transduction					Endosome, Golgi apparatus, Intracellular				GTPase activity, GTP binding
Solyc04g076340.3	A0A3Q7G5D6		NA					NA				NA
Solyc03g118060.3	A0A3Q7FS74		NA					NA				NA
Solyc03g119390.3	A0A3Q7FUH2		Regulation of transcription; DNA templated					Nucleus				DNA binding transcription factor activity, Protein dimerisation activity, Sequence-specific DNA binding
Solyc12g042600.2	A0A3Q7JVZ9		NA					Intracellular membrane-bound organelle				UDP-glycosyltransferase activity, Transferase activity; transferring hexosyl groups
Solyc02g065050.1	A0A3Q7F1D5		Proteolysis, Protein catabolic process					NA				Aspartic-type endopeptidase activity
Solyc02g082060.2	A0A3Q7F7Z1		Protein deubiquitination, Protein modification by small protein removal					NA				Ubiquitinyl hydrolase activity
Solyc02g090990.1	A0A3Q7FAL6		Protein phosphorylation,Signal transduction by protein phosphorylation, Stress-activated protein kinase signaling cascade, activation of protein minase activity					Cytoplasm				ATP binding, Protein kinase activity, Protein Ser/Thr kinase activity,
Solyc10g048190.1	A0A3Q7IFL6		NA					Nucleus				NA
Solyc02g082850.3	A0A3Q7F8F7		Cysteine biosynthetic process from serine					Cytosol, Cytoplasm				Serine-O-acetyltransferase activity, Transferase activity
Solyc09g097970.3	A0A3Q7I8W0		NA					NA				NA
Solyc08g006690.1	A0A3Q7HHH3		Cell wall organisation, Negative regulation of catabolic activity					Extracellular region				Enzyme inhibitor activity, Hydrolase activity
Solyc08g006980.3	A0A3Q7IEE8		NA					NA				NA
Solyc05g009170.2	A0A3Q7GED8		Cytokinin activated signaling pathway, Gibberelic acid mediated signaling pathway, Trichome differentiation					Nucleus				DNA binding transcription factor activity, Transcription regulatory region sequence-specific DNA binding, Nucleic acid binding, Sequence-specific DNA binding, Transcription regulatory region DNA binding
Solyc07g065980.3	Q8H6N3		Carbohydrate metabolic process, Raffinose family oligosaccharide biosynthetic process					NA				Catalytic activity
Solyc12g096570.1	A0A3Q7JDU3		Positive regulation of organ growth					Nucleus, Cytoplasm, Integral component of membrane, Membrane				NA
Solyc12g044420.1	A0A3Q7JA01		NA					NA				NA
Solyc01g094010.3	A0A3Q7ELK6		NA					NA				Hydrolase activity
Solyc04g072900.1	Q8GZE8		Defense response, Transcription; DNA templated, Regulation of transcription; DNA templated					Nucleus				DNA-binding transcription factor activity, Sequence-specific DNA binding, DNA binding
Solyc05g056330.3	A0A3Q7GLM7		NA					NA				Metal ion binding
Solyc10g006130.1	A0A3Q7IBC2		Defense response, Transcription; DNA templated, Regulation of transcription; DNA templated					Nucleus				DNA-binding, DNA-binding transcription factor activity, Sequence-specific DNA binding
Solyc03g120330.1	A0A3Q7FTI1		NA					NA				Protein binding
Solyc08g076930.1	A0A3Q7HRZ6		Defense response, Multicellular organism development, Positive regulation of transcription; DNA templated, Regulation of growth, Regulation of transcription; DNA templated					Nucleus				DNA-binding transcription factor activity, Protein dimerisation activity, Sequence-specific DNA binding, Transcription regulatory region sequence-specific DNA binding
Solyc03g020030.3	A0A3Q7FH23		NA					NA				Serine-type endopeptidse inhibitor activity
Solyc06g065340.1	A0A3Q7GYV7		NA					NA				NA
Solyc07g017610.3	A0A3Q7H8R6		L-Lysine catabolic process to acetyl-CoA via saccharopine, Lysine biosynthetic process via aminoadipic acid, Oxidation-reduction process					Cytoplasm, Integral component of membrane				Saccharopine dehydrogenase (NAD+, L-Glutamate forming) activity, Saccharopine dehydrogenase (NADP+ , L-Lysine forming) activity, Saccharopine dehydrogenase activity, Oxidoreductase activity
Solyc03g112310.1	K4BK85		Defense response, Defense response to bacterium, Defense response to oomycetes, Phosphorylation, Protein phosphorylation, Transmembrane receptor protein Serine/Threonine kinase signaling pathway					Plasma membrane, Vacuole, Integral component of membrane, Membrane				ATP binding, Carbohydrate binding, Transmembrane receptor protein Serine/Threonine kinase activity, Nucleotide binding, Protein kinase activity, ATP binding, Kinase activity, Transferase activity
Solyc01g111970.3	A0A3Q7FF59		Oxidation-reduction process					Plant-type cell wall, Plasmodesma				Copper ion binding, Oxidoreductase activity, Oxidoreductase activity; oxidising metal ions
Solyc10g007830.1	A0A3Q7IC73		NA					Membrane				Protein binding
Solyc01g100460.3	Q6A1K9		Positive regulation of transcription; DNA templated, Regulation of transcription; DNA templated					Nucleus				DNA-binding transcription factor activity, Sequence-specific DNA binding, Transcription regulatory region sequence-specific DNA binding, Transcription regulatory region DNA binding
Solyc10g086760.2	A0A3Q7IPL2		Microtubule-based processes, Mitotic cell cycle, Microtubule cytoskeleton organisation					Microtubule, Cytoplasm				GTPase activity, GTP binding, S-adenosylmethionine-dependant methyltransferase activity, Structural constituent of cytoskeleton
Solyc07g007760.3	A0A3Q7H3Y0		Defense response					NA				NA
Solyc05g055290.3	A0A3Q7HHE8		NA					NA				NA
Solyc03g117640.1	A0A3Q7FU24		Protein phosphorylation, Signal transduction by protein phosphorylation, Stress-activated protein kinase signaling cascade, Activation of protein kinase activity					Cytoplasm				ATP binding, Protein serine/threonine kinase activity, Protein kinsae activity
Solyc09g008970.1	A0A3Q7HWP0		NA					NA				NA
Solyc04g007580.1	A0A3Q7GNR2		NA					NA				NA
Solyc09g075470.2	K4CVC4		NA					NA				NA
Solyc09g075950.1	A0A3Q7I626		Cellular response to unfolded protein, Chaperone cofactor-dependant protein refolding, Protein refolding, Response to unfolded protein, Response to high light intensity, Cellular response to heat, Response to hydrogen peroxide					Cytoplasm				ATPase activity, ATP binding, Heat shock protein binding, Misfolded protein binding, Unfolded protein binding, Protein folding chaperone, ATPase activity;coupled
Solyc12g042380.2	A0A3Q7JVY0		NA					Integral component of membrane				NA
Solyc06g074030.1	A0A3Q7HVW3		Exonucleolytic catabolism of deadenylated mRNA, Negative regulation of translation					Nucleus, CCR4-NOT core complex, P-body, CCR-NOT4 complex				Nucleic acid binding, Poly(A) specific ribonuclease activity
Solyc09g061310.3	A0A3Q7I303		Protein modification by small protein removal					NA				Hydrolase activity
Solyc10g018190.2	A0A3Q7J8B9		Oxidation-reduction process					NA				L-Ascorbic acid binding, Metal ion binding, Oxidoreductase activity, Dioxygenase activity
Solyc05g007450.3	A0A3Q7GCJ9		DNA replication initiation, DNA replication, Pollen development					Nuclear origin of replication recognition complex				DNA binding, DNA replication origin binding
Solyc09g092670.3	A0A3Q7IA93		Oxidation-reduction process					Membrane				Heme binding, Iron ion binding, Monooxygenase activity, Oxidoreductase activity; acting on paired donors; with incorporation or reduction of molecular oxygen, Oxidoreductase activity; acting on paired donors; with incorporation or reduction of molecular oxygen; NAD(P)H as one donor; and incorporation of one atom of oxygen
Solyc07g053610.3	A0A3Q7HEL9		Regulation od transcription; DNA templated, Transcription; DNA templated					Nucleus				DNA binding
Solyc03g116890.3	A0A3Q7GHS3		Regulation of transcription; DNA templated					Nucleus				DNA-binding transcription factor activity, Sequence-specific DNA binding, DNA binding
Solyc09g015770.3	I3NN77		Regulation of transcription; DNA templated					Nucleus				DNA-binding transcription factor activity, Sequence-specific DNA binding, DNA binding
Solyc12g098850.2	A0A3Q7JYS2		NA					NA				FMN binding, Oxidoreductase activity; acting on NAD(P)H, NAD binding, 4 iron; 4 sulfer cluster binding
Solyc09g075440.3	Q41341		Phosphorelay signal transduction system, Signal transduction, Ethylene-activated signaling pathway, Phosphorylation, Signal transduction by protein phosphorylation					Endoplasmic reticulum, Integral component of membrane, Membrane				Ethylene binding, Ethylene receptor activity, Phosphorelay sensor kinase activity, Protein binding, Transferase activity; transferring phosphurus-containing groups,
Solyc11g020230.1	A0A3Q7ITE3		Protein phosphorylation					Integral component of membrane				ATP binding, Protein kinase activity
Solyc12g014430.2	A0A3Q7J4Q4		Cellulose biosynthetic process, Plant-type primary cell wall biogenesis, Cell wall organisation					Golgi apparatus, Trans-golgi network, Plasma membrane, Integral component of membrane, Membrane				Cellulose synthase (UDP-forming) activity, Mannan synthase activity, Cellulose synthase activity
Solyc02g088090.1	A0A3Q7FWP6		NA					Integral component of membrane				Calcium ion binding
Solyc09g008070.3	A0A3Q7ISP8		Autophagosome maturation, ER-associated misfolded protein catabolic process, Macroautophagy, Mitotic spindle disassembly, Retrograde protein transport; ER to cytosol, Ubiquitin-dependant ERAD pathway					Cytosol, Nucleus, Cytoplasm, VCP-NPL4-UFD1 AAA ATPase complex				ATPase activity, ATP binding, Polyubiquitin modification-dependant protein binding, Hydrolase activity
Solyc03g096630.1	A0A3Q7FMU2		Ethylene-activated signaling pathway, Cellular response to iron ion					Nucleus				DNA binding, DNA-binding transcription factor activity
Solyc11g072630.2	E2GLN8		Intracellular signal transduction, Regulation of gene expression, MAPK regulation, Lateral root formation, Protein phosphorylation, Phosphorylation					Nucleus, Cytoplasm				ATP binding, MAP kinase activity, Nucleotide binding, Protein kinase activity, Protein serine/threonine kinase activity, Kinase activity, Transferase activity
Solyc03g123550.1	A0A3Q7FWJ2		Response to auxin					NA				NA
Solyc07g055950.3	A0A3Q7HDG6		NA					NA				NA
Solyc04g077810.1	A0A3Q7G672		NA					Integral component of membrane				NA
Solyc10g005480.3	A0A3Q7I9L9		NA					NA				NA
Solyc05g012820.1	A0A3Q7GFZ2		NA					Integral component of membrane				NA
Solyc12g088430.1	A0A3Q7JBQ9		NA					Integral component of membrane				NA
Solyc03g098030.3	A0A3Q7FN50		Phosphatidylinositol dephosphorylation					NA				Phosphatidylinositol-3,4,5-trisphosphate 5-phosphatase activity, Phosphatidylinositol-4,5-bisphosphate 5-phosphatase activity,
Solyc12g005450.1	A0A3Q7J1S2		Protein phosphorylation					Plasma membrane				ATP binding, Protein kinase activity, Transmembrane receptor protein serine/threonine kinase activity
Solyc05g007580.1	A0A3Q7GCL4		Regulation of transcription; DNA templated					Integral component of membrane				DNA-binding transcription factor activity, Transcription regulatory region sequence-specific DNA binding, DNA binding
Solyc05g007710.3	A0A3Q7H605		Cell differentiation					Nucleus				Sequence-specific DNA binding, Transcription regulatory region sequence-specific DNA binding, DNA binding
Solyc06g065820.3	Q8S9H4		Defense response, Transcription; DNA templated, Regulation of transcription; DNA templated					Nucleus				DNA binding, DNA-binding transcription factor activity
Solyc10g086410.3	P27322		Cellular response to unfolded protein, Chaperone cofactor-dependant protein refolding, Protein refolding, Response to unfolded protein, Cellular response to heat					Cytoplasm				ATPase activity, ATP binding, Heat shock protein binding, Misfolded protein binding, Protein folding chaperone, Unfolded protein binding, ATPase activity; coupled, Nucleotide binding
Solyc06g068150.3	A0A3Q7GXL8		NA					Integral component of membrane				Diacylglycerol cholinephosphotransferase activity
Solyc07g053050.1	A0A3Q7I8H9		NA					NA				Calcium ion binding
Solyc10g080880.2	E5KGD2		Auxin-activated signaling pathway, Auxin efflux, Auxin homeostasis, Auxin polar transport, Transmembrane transport					Endoplasmic reticulum, Plasma membrane, Integral component of membrane, Membrane				Auxin efflux transmembrane transport activity
Solyc02g091390.3	A0A3Q7FAS7		NA					Integral component of membrane				NA
Solyc03g044860.1	A0A3Q7G6D6		NA					NA				NA
Solyc04g006940.3	A0A3Q7FYP6		Phospholipid translocation, Phospholipid transport, Golgi vesicle budding					Plasma membrane, Integral component of membrane, Golgi membrane, Trans-golgi network				ATPase coupled intramembrane lipid transporter activity, ATP binding, Magnesium ion binding, Nucleotide binding
Solyc12g041960.2	A0A3Q7J949		Aromatic compound biosynthetic process, Methylation					NA				O-methyltransferase activity, Protein dimerisation activity, S-adenosylmethionine-dependant methyltransferase activity, Methyltransferase activity
Solyc05g054670.3	A0A3Q7GMJ8		NA					NA				Metal ion binding
Solyc08g068690.1	A0A3Q7HS72		Ornithine metabolic process					NA				N-acetyltransferase activity
Solyc09g008810.3	A0A3Q7HWL5		Positive regulation of transcription; DNA templated, Regulation of transcription; DNA templated					Nucleus				DNA binding transcription factor activity; RNA polymerase 2 specific, Sequence-specific DNA binding, DNA binding, DNA binding transcription factor activity
Solyc11g012980.1	A0A3Q7JJV3		Defense response, Transcription; DNA templated, Regulation of transcription; DNA templated					Nucleus				DNA binding, DNA-binding transcription factor activity
Solyc02g086810.1	A0A3Q7FAC6		NA					NA				NA
Solyc05g013207.1	A0A3Q7GF03		Fatty acid biosynthetic process					Integral component of membrane, Membrane				3-Oxo-arachidoyl-CoA synthase activity, 3-Oxo-cerotoyl-CoA synthase activity, 3-Oxo-lignoceronyl-CoA synthase activity, Very-long-chain 3-ketoacyl-CoA synthase activity, Transferase activity; transferring acyl groups, Transferase activity; transferring acyl groups other than amino-acyl groups, Catalytic activity
Solyc08g006150.3	A0A3Q7IDY3		Glutathione catabolic process					Cytoplasm				Gamma-glutamylcyclotransferase activity
Solyc04g017690.3	A0A3Q7G0V7		NA					NA				NA
Solyc10g074440.2	A0A3Q7JDI3		Carbohydrate metabolic process, Cell wall macromolecule catabolic process, Chitin catabolic process, Defense response to fungus					Extracellular region, Vacuole				Chitinase activity, Chitin binding
Solyc04g016440.3	A0A3Q7GSS5		NA					Chloroplast inner membrane, Integral component of membrane, Membrane				NA
Solyc08g082090.1	A0A3Q7HWL6		NA					NA				NA
Solyc01g100210.3	A0A3Q7ENK0		NA					Golgi apparatus				Transferase activity; transferring glycosyl groups
Solyc03g007950.3	A0A3Q7FE04		Carbohydrate metabolic process					Cell wall				Polygalacturonase activity
Solyc09g072980.2	K4CUX4		NA					NA				Protein binding
Solyc09g065630.3	K4CUI9		Regulation of defense response, Regulation of jasmonic acid mediated signaling pathway, Response to wounding					Nucleus				NA
Solyc10g084170.1	A0A3Q7IM98		Protein folding					Plasmodesma				Chaperone binding, Protein binding
Solyc01g110930.1	A0A3Q7EU49		Response to auxin					NA				NA
Solyc01g109120.3	A0A3Q7ETC1		NA					NA				Protein binding
Solyc11g006230.2	A0A3Q7IQD3		Cell population proliferation, Leaf development, Positive regulation of transcription; DNA templated, Positive regulation of transcription by RNA polymerase 2					Nucleus				Transcription coactivator activity
Solyc02g091180.1	A0A3Q7FAD6		NA					NA				NA
Solyc06g066680.3	A0A3Q7GWH3		Acyl carnitine transport, Amino acid transport, Transmembrane transport					Integral component of membrane				ATP transmembrane transporter activity, Transmembrane transporter activity
Solyc03g097410.1	A0A3Q7FNC7		Inositol phosphorylation, Inositol trisphosphate metabolic process					Cytosol, Cytoplasm, Intracellular				ATP binding, Inositol-1,3,4-trisphosphate 5-kinase activity, Inositol-1,3,4-trisphosphate 6-kinase activity, inositol tetrakisphosphate 1-kinase activity, Magnesium ion binding
Solyc04g078310.3	A0A3Q7GA39		Cell division, Mitotic cell cycle phase transition, Regulation of cyclin-dependant protein serine/threonine kinase activity, Mitotic cell cycle, Protein phosphorylation, Regulation of mitotic nuclear division, Positive regulagtion of cell population proliferation, Positive regulation of cell cycle					Nucleus, Cyclin-dependent protein kinase holoenzyme complex, Cytoplasm				Cyclin-dependent protein serine/threonine kinase regulator activity, Protein binase binding
Solyc12g007020.2	A0A3Q7J2A0		NA					Cytosol				Microtubule binding
Solyc08g014080.3	A0A3Q7HIV9		Protein ubiquitination					Integral component of membrane				Ubiquitin-protein transferase activity, Zinc ion binding
Solyc11g005770.2	A0A3Q7IQ29		Cell wall modification, Pectin catabolic process					Extracellular region, Cell wall				Aspartyl esterase activity, Pectinesterase activity, Pectinesterase inhibitor activity, Enzyme inhibitor activity
Solyc07g065165.1	A0A3Q7HIN1		NA					NA				NA
Solyc07g064600.3	A0RZD0		Organonitrogen compound catabolic proceess					Cytosol, Mitochondrion				Deaminase activity
Solyc07g063770.3	A0A3Q7HHX3		Recognition of pollen, Protein phosphorylation					Integral component of membrane, Plasma membrane				ATP binding, Protein serine kinase activity, Protein threonine kinase activity, Protein kinase activity, Protein serine/threonine kinase activity
Solyc05g007690.2	A0A3Q7GDP8		Cell differentiation					Nucleus				DNA binding, Sequence-specific DNA binding, Transcription regulatory region DNA binding
Solyc02g093250.3	A0A3Q7FDU8		Lignin biosynthetic process, Methylation, Phenylpropanoid biosynthetic process					NA				Caffeoyl-CoA O-methyltransferase activity, S-adenosylmethionine-dependant methyltransferase activity, Methyltransferase activity, O-methyltransferase activity, Transferase activity
Solyc02g090970.1	A0A3Q7FYC8		Protein phosphorylation, Signal transduction by protein phosphorylation, Stress-activated protein kinase signaling cascade, Activation of protein kinase activity					Cytoplasm				ATP binding, Protein serine/threonine kinase activity, Protein kinsae activity
Solyc02g089420.1	A0A3Q7FXF7		Regulation of transcription; DNA templated					NA				DNA-binding transcription factor activity
Solyc07g043480.1	A0A3Q7HCG1		NA					Intracellular membrane-bound organelle				UDP glycosyltransferase activity, Transferse activity; transferring hexosyl groups
Solyc12g056410.2	A0A3Q7JBU8		NA					NA				Protein binding
Solyc08g068600.3	A0A3Q7HPN2		Carboxylic acid metabolic process					NA				Carboxy-lyase activity, Pyridoxal phosphate binding, Catalytic activity, Lyase activity
Solyc09g061760.1	A0A3Q7IZ64		NA					Mitochondrion				Protein binding
Solyc04g058170.1	A0A3Q7G6F1		NA					NA				Calcium ion binding
Solyc11g065620.2	H6WYS2		Response to cold, Sulfur amino acid biosynthetic process, Sulfate assimilation, Sulfur compound metabolic process, Oxidation-reduction process					Chloroplast envelope, Chloroplast nucleoid, Chloroplast stroma, Apoplast, Stromule, Sulfite reductase complex (NADPH), Chloroplast, Plastid envelope				4 iron; 4 sulfur cluster binding, Copper ion binding, Heme binding, Sulfite reductase (ferrodoxin) activity, Sulfite reductase activity, Oxidoreductase activity, Metal ion binding, Iron-sulfur cluster binding
Solyc03g121400.1	A0A3Q7FVZ1		Regulation of transcription; DNA templated					Nucleus				DNA binding
Solyc02g081210.3	A0A3Q7F653		Plant-type cell wall organisation					Cell wall, Extracellular region, Membrane				NA
Solyc10g050970.1	A0A3Q7IGA1		Defense response, Transcription; DNA templated, Regulation of transcription; DNA templated					Nucleus, Integral component of membrane				DNA binding, DNA-binding transcription factor activity,
Solyc02g064980.1	A0A3Q7EZI7		Protein phosphorylation, Protein phosphorylation by signal transduction, Stress-activated protein kinase signaling cascade, Activation of protein kinase activity					Cytoplasm				ATP binding, Protein serine/threonine kinase activity, Protein kinase activity
Solyc03g006620.3	A0A3Q7FFQ3		NA					Integral component of membrane				NA
Solyc01g111980.3	A0A3Q7EWB1		Amino acid transport, Amino acid transmembrane transport					Plasma membrane, Integral component of membrane				Amino acid transmembrane transporter activity
Solyc07g008620.1	Q6JN47		Defense response to fungus, Defense response					Plasma membrane, Integral component of membrane, Membrane				Protein binding
Solyc01g111500.3	A0A3Q7EUM9		Cell differentiation					Nucleus				DNA binding, Sequence-specific DNA binding, Transcription regulatory region DNA binding
Solyc09g091960.3	A0A3Q7I9Y8		NA					Nucleus				DNA binding
Solyc03g114160.1	A0A3Q7FR76		Protein ubiquitination					Nucleus, Cytoplasm				Ubiquitin-protein transferase activity, Protein binding
Solyc10g008260.2	A0A3Q7IB62		Regulation of transcription by RNA polymerase 2					Nucleus, RNA polymerase 2 transcription regulator complex				DNA-binding transcription factor activity, Protein dimerzation activity, RNA polymerase 2 transcription regulatory region sequence-specific DNA binding, Transcription factor binding, DNA binding, RNA polymerase 2 regulatory region sequence-specific DNA binding
Solyc12g014480.2	A0A3Q7J4R7		NA					NA				NA
Solyc05g006870.3	A0A3Q7GE00		Cell redox homeostasis, Glycerol ether metabolic process					Cell				Protein disulfide oxidoreductase activity
Solyc01g110800.3	A0A3Q7EU24		Response to auxin					NA				NA
NOTES :
Black : Annotations uniquely found in UniProtKB
Blue 3 : Annotations uniquely found in EnsemblePlants
Red : Annotations uniquely found in Gramene
NA : Annotations are found nowhere from above list of databases

## Sheet: Summary of annotations
Summary of number of genes annotated to all GO annotations obtained for DEGs
	Sr. No.	GO : Cellular component					No. of genes			Sr.No,	GO : Biological process								No. of genes			Sr. No.	GO : Molecular Function								No. of genes
	1	Apoplast					1			1	Abscisic acid-activated signaling pathway								1			I	3-beta-hydroxy-delta-5-steroid dehydrogenase activity								1
	2	CCR4-NOT complex					1			2	Activation of protein kinase activity								4			II	3-oxo-arachidoyl-CoA synthase activity								2
	3	CCR4-NOT core complex					1			3	Acyl carnitine transport								1			III	3-oxo-cerotoyl-CoA synthase activity								2
	4	Cell					1			4	Amino acid transmembrane transport								1			IV	3-oxo-lignoceronoyl-CoA synthase activity								2
	5	Cell wall					3			5	Amino acid transport								2			V	4 iron; 4 sulfur cluster binding								2
	6	Chloroplast					2			6	Aromatic compound biosynthetic process								1			A1	Acyl-[acyl-carrier-protein] desaturase activity								1
	7	Chloroplast envelope					1			7	Autophagosome maturation								1			A2	Adenyl-nucleotide exchange factor activity								1
	8	Chloroplast inner membrane					1			8	Auxin efflux								1			A3	Amine-lyase activity								1
	9	Chloroplast nucleoid					1			9	Auxin homeostasis								1			A4	Amino acid transmembrane transporter activity								1
	10	Chloroplast stroma					2			10	Auxin polar transport								1			A5	Antiporter activity								3
	11	Cyclin-dependent protein kinase holoenzyme complex					1			11	Auxin-activated signaling pathway								4			A6	Aspartic-type endopeptidase activity								2
	12	Cytoplasm					26			12	Carbohydrate metabolic process								3			A7	Aspartyl esterase activity								1
	13	Cytosol					10			13	Carboxylic acid metabolic process								1			A8	ATP binding								22
	14	Endoplasmic reticulum					3			14	Catabolic process								1			A9	ATP transmembrane transporter activity								1
	15	Endoplasmic reticulum lumen					1			15	Cell differentiation								4			A10	ATPase activator activity								1
	16	Endosome					3			16	Cell division								1			A11	ATPase activity								6
	17	Extracellular region					6			17	Cell population proliferation								1			A12	ATPase activity; coupled								5
	18	Golgi apparatus					3			18	Cell redox homeostasis								1			A13	ATPase coupled intramembrane lipid transporter activity								1
	19	Golgi membrane					1			19	Cell wall macromolecule catabolic process								1			A14	ATPase coupled transmembrane transport activity								1
	20	Integral component of membrane					37			20	Cell wall modification								1			A15	Auxin efflux transmembrane transport activity								1
	21	Intracellular					2			21	Cell wall organisation								2			C1	Caffeoyl-CoA O-methyltransferase activity								1
	22	Intracellular membrane bound organelle					7			22	Cellular amino acid metabolic process								1			C2	Calcium ion binding								3
	23	Membrane					17			23	Cellular lipid metabolic process								1			C3	Carbohydrate binding								1
	24	Microtubule					1			24	Cellular protein modification process								1			C4	Carboxy-lyase activity								1
	25	Mitochondrion					2			25	Cellular response to heat								1			C5	Catalytic activity								6
	26	Nuclear origin of replication recognition complex					1			26	Cellular response to heat								6			C6	Cation binding								1
	27	Nucleus					43			27	Cellular response to iron ion								1			C7	Cellulose synthase (UDP-forming) activity								1
	28	P-body					1			28	Cellular response to unfolded protein								4			C8	Cellulose synthase activity								1
	29	Plant-type cell wall					2			29	Cellulose biosynthetic process								1			C9	Chaperone binding								3
	30	Plasma membrane					11			30	Chaperone cofactor-dependent protein refolding								5			C10	Chitin binding								1
	31	Plasmodesma					4			31	Chaperone-mediated protein folding								1			C11	Chitinase activity								1
	32	Plastid					1			32	Chitin catabolic process								1			C12	Copper ion binding								1
	33	Plastid envelope					1			33	Cysteine biosynthetic process from serine								1			C13	Cyclin-dependent protein seine/threonine kinase regulator activity								1
	34	RNA polymerase II transcription regulatory complex					1			34	Cytokinin-activated signaling pathway								1			C14	Cysteine-type endopeptidase activity								1
	35	Stromule					1			35	Defense response to bacterium								1			D1	Deaminase activity								1
	36	Sulfite reductase complex (NADPH)					1			36	Defense response to fungus								2			D2	Diacylglycerol cholinephosphotransferase activity								1
	37	Trans-golgi network					3			37	Defense response to oomycetes								1			D3	Dioxygenase activity								2
	38	Vacuole					2			38	Defense response								13			D4	DNA binding								25
	39	VCP-NPL4-UFD1 AAA ATPase complex					1			39	DNA repair								1			D5	DNA binding transcription factor activity								25
										40	DNA replication initiation								1			D6	DNA binding transcription factor activity; RNA polymerase II specific								3
										41	DNA replication								1			D7	DNA replication origin binding								1
										42	Drug transmembrane transport								3			E1	Endopeptidase inhibitor activity								3
										43	ER-associated misfolded protein catabolic process								1			E2	Enzyme inhibitor activity								2
										44	Ethylene activated signalling pathway								3			E3	Ethylene binding								1
										45	Exonucleolytic catabolism of deadenylated mRNA								1			E4	Ethylene receptor activity								1
										46	Fatty acid biosynthetic process								3			F1	FAD binding								2
										47	Fatty acid metabolic process								1			F2	FK506 binding								1
										48	Flavonoid biosynthetic process								1			F3	FMN binding								1
										49	Fruit ripening								1			G1	Gamma-glutamylcyclotransferase activity								1
										50	Gene silencing by RNA								1			G2	GTP binding								2
										51	Gibberelic acid mediated signaling pathway								1			G3	GTPase activity								2
										52	Glutathione catabolic process								1			H1	Heat shock protein binding								5
										53	Glycerol ether metabolic process								1			H2	Heme binding								4
										54	Golgi vesicle budding								1			H3	Hsp90 protein binding								1
										55	Histone ubiquitination								1			H4	Hydrolase activity								5
										56	Hydrogen peroxide catabolic process								1			H5	Hydrolase activity; acting on ester bonds								1
										57	Inositol phosphorylation								1			I1	Inositol tetrakisphosphate 1-kinase activity								1
										58	Inositol triphosphate metabolic process								1			I2	Inositol-1,3,4-trisphosphate 5-kinase activity								1
										59	Intracellular protein transport								1			I3	Inositol-1,3,4-trisphosphate 6-kinase activity								1
										60	Intracellular signal transduction								1			I4	Iron ion binding								2
										61	Lateral root formation								1			I5	Iron-sulfur cluster binding								1
										62	Leaf development								1			K1	Kinase activity								3
										63	Lignin biosynthetic process								1			L1	l-Ascorbic acid binding								2
										64	Lipid catabolic process								1			L2	Lipase activity								1
										65	Lipid metabolic process								1			L3	Long chain alcohol oxidase activity								1
										66	L-Lysine catabolic process to acetyl-CoA via saccharopine								1			L4	Lyase activity								1
										67	Lysine biosynthetic process via aminoadipic acid								1			M1	Magnesium ion binding								2
										68	Macroautophagy								1			M2	Magnesium-dependant protein serine/threonine phosphatase activity								1
										69	MAPK regulation								1			M3	Mannan synthase activity								1
										70	Methylation								3			M4	MAP kinase activity								1
										71	Microtubule cytoskeleton organisation								1			M5	Metal ion binding								12
										72	Microtubule-based processes								1			M6	Methyltransferase activity								3
										73	Mitotic cell cycle phase transition								1			M7	Microtubule binding								1
										74	Mitotic cell cycle								1			M8	Misfolded protein binding								4
										75	Mitotic cell cycle								1			M9	Monooxygenase activity								2
										76	Mitotic spindle disassembly								1			N1	N-acetyltransferase activity								1
										77	Multicellular organism development								1			N2	NAD binding								1
										78	Negative regulation of catabolic activity								1			N3	Naringenin-3-dioxygenase activity								1
										79	Negative regulation of endopeptidase activity								1			N4	Nuclear import signal receptor activity								1
										80	Negative regulation of peptidase activity								1			N5	Nucleic acid binding								3
										81	Negative regulation of translation								1			N6	Nucleotide binding								6
										82	Organonitrogen compound catabolic process								1			O1	O-methyltransfrease activity								2
										83	Ornithine metabolic process								1			O2	Oxidoreductase activity								8
										84	Oxidation-reduction process								14			O3	Oxidoreductase activity; acting on CH-OH group of donors								1
										85	Pectin catabolic process								1			O4	Oxidoreductase activity; acting on CH-OH group of donors, NAD or NADP as acceptor								1
										86	Phenylpropanoid biosynthetic process								1			O5	Oxidoreductase activity; acting on NAD(P)H								1
										87	Phosphate ion transport								1			O6	Oxidoreductase activity; acting on paired donors; with incorporation or reduction of molecular oxygen								2
										88	Phosphatidylinositol dephosphorylation								1			O7	Oxidoreductase activity; acting on paired donors; with incorporation or reduction of molecular oxygen; NAD(P)H as one donor; and incorporation of one atom of oxygen								2
										89	Phospholipid translocation								1			O8	Oxidoreductase activity; oxidising metal ions								1
										90	Phospholipid transport								1			P1	Pectinesterase activity								1
										91	Phosphorelay signal transduction system								1			P2	Pectinesterase inhibitor activity								1
										92	Phosphorylation								3			P3	Peptidase inhibitor activity								1
										93	Plant-type cell wall organisation								1			P4	Peptidyl-prolyl cis-trans isomerase activity								1
										94	Plant-type primary cell wall biogenesis								1			P5	Peroxidase activity								1
										95	Pollen development								1			P6	Phosphatase activity								1
										96	Pollen tube growth								1			P7	Phosphatidylinositol-3,4,5-triphosphate 5-phosphatase activity								1
										97	Positive regulation of ATPase activity								1			P8	Phosphatidylinositool-4,5-bisphosphate 5-phosphatase activity								1
										98	Positive regulation of cell cycle								1			P9	Phosphorelay sensor kinase activity								1
										99	Positive regulation of cell population proliferation								1			P10	Poly(A) specific ribonuclease activity								1
										100	Positive regulation of organ growth								1			P11	Polygalacturonase activity								1
										101	Positive regulation of transcription from RNA polymerase II								1			P12	Polyubiquitin modification-dependant protein binding								1
										102	Positive regulation of transcription from RNA polymerase II promotor in response to heat stress								2			P13	Protein binding								22
										103	Positive regulation of transcription;DNA templated								4			P14	Protein dimerisation activity								5
										104	Proteasome-mediated ubiquitin-dependant protein catabolic process								1			P15	Protein disulfide oxidoreductase activity								1
										105	Protein catabolic process								2			P16	Protein folding chaperone								4
										106	Protein dephosphorylation								1			P17	Protein heterodimerisation activity								1
										107	Protein deubiquitination								1			P18	Protein kinase activity								9
										108	Protein folding								3			P19	Protein kinase binding								1
										109	Protein import into nucleus								1			P20	Protein self-association								1
										110	Protein metabolic process								1			P21	Protein ser/thr kinase activity								7
										111	Protein modification by small protein removal								2			P22	Protein serine kinase activity								1
										112	Protein peptidyl prolyl isomerisation								1			P23	Protein serine phosphatase activity								1
										113	Protein phosphorylation								11			P24	Protein serine/threonine phosphatase activity								1
										114	Protein polyubiquitination								1			P25	Protein threonine kinase activity								1
										115	Protein refolding								4			P26	Protein threonine phosphatase activity								1
										116	Protein transport								1			P27	Pyridoxal phosphate binding								1
										117	Protein ubiquitination								4			Q1	Quercetin 3-O-glucosyltransferase activity								3
										118	Proteolysis								2			Q2	Quercetin 7-O-glucosyltransferase activity								3
										119	Pyridoxal phosphate biosynthetic process								1			R1	RNA polymerase 2 cis-regulatory region sequence-specific DNA binding								4
										120	Pyridoxine biosynthetic process								1			R2	RNA polymerase II proximal promotor sequence-specific DNA binding								2
										121	RAB protein signal transduction								1			R3	RNA polymerase II regulatory region sequence-specific DNA binding								1
										122	Raffinose family oligosaccharide biosynthetic process								1			R4	RNA polymerase II transcription regulatory region sequence-specific DNA binding								1
										123	Recognition of pollen								2			S1	Saccharopine dehydrogenase (NAD+, L-Glutamate forming) activity								1
										124	Regulation of cyclin-dependant protein serine/threonine kinase activity								1			S2	Saccharopine dehydrogenase (NAD+, L-Lysine forming) activity								1
										125	Regulation of defense response								1			S3	Saccharopine dehydrogenase activity								1
										126	Regulation of gene expression								1			S4	S-adenosylmethionine-dependant methyltransferase activity								3
										127	Regulation of growth								1			S5	Sequence-specific DNA binding								17
										128	Regulation of jasmonic acid mediated signaling pathway								1			S6	Serine-O-acetyltransferase activity								1
										129	Regulation of mitotic nuclear division								1			S7	Serine-type endopeptidase inhibitor activity								1
										130	Regulation of transcription by RNA polymerase II								3			S8	Signaling receptor activity								1
										131	Regulation of transcription;DNA templated								25			S9	Structural constituent of cytoskeleton								1
										132	Response to auxin								4			S10	Sulfite reductase (ferrodoxin) activity								1
										133	Response to cold								1			S11	Sulfite reductase activity								1
										134	Response to heat								2			T1	Transcription coactivator activity								1
										135	Response to high light intensity								1			T2	Transcription factor binding								1
										136	Response to hormone								1			T3	Transcription regulatory region DNA binding								4
										137	Response to hydrogen peroxide								1			T4	Transcription regulatory region sequence-specific DNA binding								7
										138	Response to oxidative stress								1			T5	Transferase activity								7
										139	Response to unfolded protein								5			T6	Transferase activity; transfering acyl groups other than amino-acyl groups								2
										140	Response to UV-B								1			T7	Transferase activity; transferring acyl groups								2
										141	Response to wounding								1			T8	Transferase activity; transferring glycosyl groups								4
										142	Retrograde protein transport; ER to cytosol								1			T9	Transferase activity; transferring hexosyl groups								5
										143	RNA modification								1			T10	Transferase activity; transferring phosphurus-containing groups								1
										144	SCF-dependant proteasomal ubiquitin-dependant protein catabolic process								1			T11	Transmembrane receptor protein serine/threonine kinase activity								2
										145	Signal transduction by protein phosphorylation								5			T12	Transmembrane transporter activity								4
										146	Signal transduction								1			U1	Ubiquitin conjugating enzyme activity								1
										147	Siroheme biosynthetic process								1			U2	Ubiquitin-protein transferase activity								3
										148	Steroid biosynthetic process								1			U3	Ubiquitinyl hydrolase activity								1
										149	Stomatal lineage progression								1			U4	UDP glycosyltransferase activity								6
										150	Stress-activated protein kinase signaling cascade								4			U5	Unfolded protein binding								6
										151	Sulfate assimilation								1			U6	Uroporphyrin - 3 C - methyltransferase activity								1
										152	Sulfur amino acid biosynthetic process								1			V1	Very-long-chain 3-ketoacyl-CoA synthase activity								2
										153	Sulfur compound metabolic process								1			X1	Xenobiotic transmembrane transporter activity								3
										154	Transcription;DNA templated								9			Z1	Zinc ion binding								1
										155	Transmembrane receptor protein Serine/Threonine kinase signaling pathway								1
										156	Transmembrane transport								6
										157	Trichome differentiation								1
										158	Ubiquitin-dependant ERAD pathway								1
										159	Ubiquitin-dependant protein catabolic process								1
										160	Vitamin B6 biosynthetic process								1

## Sheet: GOBP enrichment
			GOBP terms enrichment analysis of DEGs
Enrichment FDR	Genes in list	Total genes	Functional Category	Genes
9.3925e-07	39	2184	Response to stimulus	SOLYC02G064980.1 SOLYC02G083860.3 SOLYC02G090970.1 SOLYC02G090990.1 SOLYC03G096630.1 SOLYC03G112310.1 SOLYC03G113100.3 SOLYC03G117640.1 SOLYC03G118970.3 SOLYC05G009170.2 SOLYC06G076020.3 SOLYC07G007800.3 SOLYC08G080540.3 SOLYC09G008070.3 SOLYC09G065630.3 SOLYC09G075950.1 SOLYC09G098170.3 SOLYC10G079380.2 SOLYC10G080880.2 SOLYC10G086410.3 SOLYC11G010380.2 SOLYC11G066100.2 SOLYC11G072630.2 SOLYC12G…
9.83041e-06	6	31	Chaperone-mediated protein folding	SOLYC02G077670.3 SOLYC06G076020.3 SOLYC09G075950.1 SOLYC09G092690.3 SOLYC10G086410.3 SOLYC11G066100.2
1.15268e-05	17	564	Response to organic substance	SOLYC03G096630.1 SOLYC05G009170.2 SOLYC06G076020.3 SOLYC07G007800.3 SOLYC09G008070.3 SOLYC09G065630.3 SOLYC09G075950.1 SOLYC10G080880.2 SOLYC10G086410.3 SOLYC11G066100.2 SOLYC01G110800.3 SOLYC01G110920.3 SOLYC01G110930.1 SOLYC03G093610.1 SOLYC03G123550.1 SOLYC05G052520.3 SOLYC09G075440.3
1.15268e-05	20	784	Response to chemical	SOLYC03G096630.1 SOLYC03G118970.3 SOLYC05G009170.2 SOLYC06G076020.3 SOLYC07G007800.3 SOLYC09G008070.3 SOLYC09G065630.3 SOLYC09G075950.1 SOLYC10G080880.2 SOLYC10G086410.3 SOLYC11G010380.2 SOLYC11G066100.2 SOLYC12G005850.2 SOLYC01G110800.3 SOLYC01G110920.3 SOLYC01G110930.1 SOLYC03G093610.1 SOLYC03G123550.1 SOLYC05G052520.3 SOLYC09G075440.3
1.15268e-05	8	89	Response to heat	SOLYC06G076020.3 SOLYC08G080540.3 SOLYC09G075950.1 SOLYC10G079380.2 SOLYC10G086410.3 SOLYC11G066100.2 SOLYC09G005120.3 SOLYC11G071830.2
1.21298e-05	6	42	Cellular response to heat	SOLYC06G076020.3 SOLYC08G080540.3 SOLYC09G075950.1 SOLYC10G079380.2 SOLYC10G086410.3 SOLYC11G066100.2
1.21298e-05	5	22	Response to topologically incorrect protein	SOLYC06G076020.3 SOLYC09G008070.3 SOLYC09G075950.1 SOLYC10G086410.3 SOLYC11G066100.2
1.21298e-05	5	22	Cellular response to topologically incorrect protein	SOLYC06G076020.3 SOLYC09G008070.3 SOLYC09G075950.1 SOLYC10G086410.3 SOLYC11G066100.2
1.21298e-05	5	22	de novo posttranslational protein folding	SOLYC02G077670.3 SOLYC06G076020.3 SOLYC09G075950.1 SOLYC10G086410.3 SOLYC11G066100.2
1.21298e-05	5	22	Chaperone cofactor-dependent protein refolding	SOLYC02G077670.3 SOLYC06G076020.3 SOLYC09G075950.1 SOLYC10G086410.3 SOLYC11G066100.2
1.21298e-05	12	284	Cellular response to organic substance	SOLYC03G096630.1 SOLYC05G009170.2 SOLYC06G076020.3 SOLYC09G008070.3 SOLYC09G065630.3 SOLYC09G075950.1 SOLYC10G080880.2 SOLYC10G086410.3 SOLYC11G066100.2 SOLYC03G093610.1 SOLYC05G052520.3 SOLYC09G075440.3
1.9582e-05	9	149	Response to temperature stimulus	SOLYC06G076020.3 SOLYC08G080540.3 SOLYC09G075950.1 SOLYC10G079380.2 SOLYC10G086410.3 SOLYC11G066100.2 SOLYC09G005120.3 SOLYC11G065620.2 SOLYC11G071830.2
3.07705e-05	23	1142	Response to stress	SOLYC02G064980.1 SOLYC02G090970.1 SOLYC02G090990.1 SOLYC03G112310.1 SOLYC03G113100.3 SOLYC03G117640.1 SOLYC06G076020.3 SOLYC08G080540.3 SOLYC09G008070.3 SOLYC09G065630.3 SOLYC09G075950.1 SOLYC10G079380.2 SOLYC10G086410.3 SOLYC11G066100.2 SOLYC07G008620.1 SOLYC02G080530.3 SOLYC03G093610.1 SOLYC04G072900.1 SOLYC06G065820.3 SOLYC07G007760.3 SOLYC09G005120.3 SOLYC11G065620.2 SOLYC11G071830.2
4.5558e-05	5	30	de novo protein folding	SOLYC02G077670.3 SOLYC06G076020.3 SOLYC09G075950.1 SOLYC10G086410.3 SOLYC11G066100.2
4.98662e-05	38	2702	Regulation of cellular process	SOLYC01G100460.3 SOLYC02G064980.1 SOLYC02G090970.1 SOLYC02G090990.1 SOLYC03G096630.1 SOLYC03G117640.1 SOLYC04G078310.3 SOLYC05G009170.2 SOLYC06G074030.1 SOLYC08G080540.3 SOLYC09G065630.3 SOLYC09G098170.3 SOLYC10G008260.2 SOLYC10G079380.2 SOLYC10G080880.2 SOLYC11G006230.2 SOLYC11G072630.2 SOLYC02G089420.1 SOLYC03G020010.1 SOLYC03G093610.1 SOLYC03G112310.1 SOLYC03G116890.3 SOLYC03G119390.3 SOLYC03G…
6.0647e-05	4	15	Cellular response to unfolded protein	SOLYC06G076020.3 SOLYC09G075950.1 SOLYC10G086410.3 SOLYC11G066100.2
6.0647e-05	40	2958	Regulation of biological process	SOLYC01G100460.3 SOLYC02G064980.1 SOLYC02G090970.1 SOLYC02G090990.1 SOLYC03G096630.1 SOLYC03G117640.1 SOLYC04G078310.3 SOLYC05G009170.2 SOLYC06G074030.1 SOLYC08G080540.3 SOLYC09G065630.3 SOLYC09G098170.3 SOLYC10G008260.2 SOLYC10G079380.2 SOLYC10G080880.2 SOLYC11G006230.2 SOLYC11G072630.2 SOLYC02G069260.3 SOLYC02G089420.1 SOLYC03G020010.1 SOLYC03G093610.1 SOLYC03G112310.1 SOLYC03G116890.3 SOLYC03G…
6.0647e-05	4	15	Response to unfolded protein	SOLYC06G076020.3 SOLYC09G075950.1 SOLYC10G086410.3 SOLYC11G066100.2
7.37787e-05	42	3229	Biological regulation	SOLYC01G100460.3 SOLYC02G064980.1 SOLYC02G090970.1 SOLYC02G090990.1 SOLYC03G096630.1 SOLYC03G117640.1 SOLYC04G006940.3 SOLYC04G078310.3 SOLYC05G009170.2 SOLYC06G074030.1 SOLYC08G006690.1 SOLYC08G080540.3 SOLYC09G065630.3 SOLYC09G098170.3 SOLYC10G008260.2 SOLYC10G079380.2 SOLYC10G080880.2 SOLYC11G006230.2 SOLYC11G072630.2 SOLYC02G069260.3 SOLYC02G089420.1 SOLYC03G020010.1 SOLYC03G093610.1 SOLYC03G…
0.000116172	30	1963	Regulation of macromolecule metabolic process	SOLYC01G100460.3 SOLYC02G064980.1 SOLYC02G090970.1 SOLYC02G090990.1 SOLYC03G117640.1 SOLYC04G078310.3 SOLYC06G074030.1 SOLYC08G080540.3 SOLYC10G008260.2 SOLYC10G079380.2 SOLYC11G006230.2 SOLYC11G072630.2 SOLYC02G069260.3 SOLYC02G089420.1 SOLYC03G020010.1 SOLYC03G093610.1 SOLYC03G116890.3 SOLYC03G119390.3 SOLYC03G121400.1 SOLYC04G072900.1 SOLYC06G065820.3 SOLYC07G053610.3 SOLYC09G008810.3 SOLYC09G…
0.000123723	22	1184	Cellular response to stimulus	SOLYC02G064980.1 SOLYC02G090970.1 SOLYC02G090990.1 SOLYC03G096630.1 SOLYC03G113100.3 SOLYC03G117640.1 SOLYC05G009170.2 SOLYC06G076020.3 SOLYC08G080540.3 SOLYC09G008070.3 SOLYC09G065630.3 SOLYC09G075950.1 SOLYC09G098170.3 SOLYC10G079380.2 SOLYC10G080880.2 SOLYC10G086410.3 SOLYC11G066100.2 SOLYC11G072630.2 SOLYC03G093610.1 SOLYC03G112310.1 SOLYC05G052520.3 SOLYC09G075440.3
0.000123723	12	379	Cellular response to chemical stimulus	SOLYC03G096630.1 SOLYC05G009170.2 SOLYC06G076020.3 SOLYC09G008070.3 SOLYC09G065630.3 SOLYC09G075950.1 SOLYC10G080880.2 SOLYC10G086410.3 SOLYC11G066100.2 SOLYC03G093610.1 SOLYC05G052520.3 SOLYC09G075440.3
0.000144439	28	1791	Regulation of nitrogen compound metabolic process	SOLYC01G100460.3 SOLYC02G064980.1 SOLYC02G090970.1 SOLYC02G090990.1 SOLYC03G117640.1 SOLYC04G078310.3 SOLYC06G074030.1 SOLYC08G080540.3 SOLYC10G008260.2 SOLYC10G079380.2 SOLYC11G006230.2 SOLYC02G089420.1 SOLYC03G020010.1 SOLYC03G093610.1 SOLYC03G116890.3 SOLYC03G119390.3 SOLYC03G121400.1 SOLYC04G072900.1 SOLYC06G065820.3 SOLYC07G053610.3 SOLYC09G008810.3 SOLYC09G011170.3 SOLYC09G015770.3 SOLYC10G…
0.000170209	28	1811	Regulation of primary metabolic process	SOLYC01G100460.3 SOLYC02G064980.1 SOLYC02G090970.1 SOLYC02G090990.1 SOLYC03G117640.1 SOLYC04G078310.3 SOLYC06G074030.1 SOLYC08G080540.3 SOLYC10G008260.2 SOLYC10G079380.2 SOLYC11G006230.2 SOLYC02G089420.1 SOLYC03G020010.1 SOLYC03G093610.1 SOLYC03G116890.3 SOLYC03G119390.3 SOLYC03G121400.1 SOLYC04G072900.1 SOLYC06G065820.3 SOLYC07G053610.3 SOLYC09G008810.3 SOLYC09G011170.3 SOLYC09G015770.3 SOLYC10G…
0.000182951	30	2032	Regulation of metabolic process	SOLYC01G100460.3 SOLYC02G064980.1 SOLYC02G090970.1 SOLYC02G090990.1 SOLYC03G117640.1 SOLYC04G078310.3 SOLYC06G074030.1 SOLYC08G080540.3 SOLYC10G008260.2 SOLYC10G079380.2 SOLYC11G006230.2 SOLYC11G072630.2 SOLYC02G069260.3 SOLYC02G089420.1 SOLYC03G020010.1 SOLYC03G093610.1 SOLYC03G116890.3 SOLYC03G119390.3 SOLYC03G121400.1 SOLYC04G072900.1 SOLYC06G065820.3 SOLYC07G053610.3 SOLYC09G008810.3 SOLYC09G…
0.000198524	8	164	Protein folding	SOLYC02G077670.3 SOLYC06G076020.3 SOLYC09G075950.1 SOLYC09G092690.3 SOLYC10G084170.1 SOLYC10G086410.3 SOLYC11G066100.2 SOLYC11G071830.2
0.000199913	6	78	Signal transduction by protein phosphorylation	SOLYC02G064980.1 SOLYC02G090970.1 SOLYC02G090990.1 SOLYC03G117640.1 SOLYC09G075440.3 SOLYC11G072630.2
0.000202015	4	22	Protein refolding	SOLYC06G076020.3 SOLYC09G075950.1 SOLYC10G086410.3 SOLYC11G066100.2
0.000246721	28	1867	Regulation of cellular metabolic process	SOLYC01G100460.3 SOLYC02G064980.1 SOLYC02G090970.1 SOLYC02G090990.1 SOLYC03G117640.1 SOLYC04G078310.3 SOLYC06G074030.1 SOLYC08G080540.3 SOLYC10G008260.2 SOLYC10G079380.2 SOLYC11G006230.2 SOLYC02G089420.1 SOLYC03G020010.1 SOLYC03G093610.1 SOLYC03G116890.3 SOLYC03G119390.3 SOLYC03G121400.1 SOLYC04G072900.1 SOLYC06G065820.3 SOLYC07G053610.3 SOLYC09G008810.3 SOLYC09G011170.3 SOLYC09G015770.3 SOLYC10G…
0.000523903	12	452	Cellular response to stress	SOLYC02G064980.1 SOLYC02G090970.1 SOLYC02G090990.1 SOLYC03G113100.3 SOLYC03G117640.1 SOLYC06G076020.3 SOLYC08G080540.3 SOLYC09G008070.3 SOLYC09G075950.1 SOLYC10G079380.2 SOLYC10G086410.3 SOLYC11G066100.2
0.000909343	16	812	Cell communication	SOLYC02G064980.1 SOLYC02G090970.1 SOLYC02G090990.1 SOLYC03G096630.1 SOLYC03G117640.1 SOLYC05G009170.2 SOLYC09G065630.3 SOLYC09G098170.3 SOLYC10G080880.2 SOLYC11G072630.2 SOLYC03G093610.1 SOLYC03G112310.1 SOLYC05G052520.3 SOLYC07G063770.3 SOLYC09G009150.1 SOLYC09G075440.3
0.000950567	12	484	Response to hormone	SOLYC03G096630.1 SOLYC05G009170.2 SOLYC07G007800.3 SOLYC09G065630.3 SOLYC10G080880.2 SOLYC01G110800.3 SOLYC01G110920.3 SOLYC01G110930.1 SOLYC03G093610.1 SOLYC03G123550.1 SOLYC05G052520.3 SOLYC09G075440.3
0.00107782	12	492	Response to endogenous stimulus	SOLYC03G096630.1 SOLYC05G009170.2 SOLYC07G007800.3 SOLYC09G065630.3 SOLYC10G080880.2 SOLYC01G110800.3 SOLYC01G110920.3 SOLYC01G110930.1 SOLYC03G093610.1 SOLYC03G123550.1 SOLYC05G052520.3 SOLYC09G075440.3
0.00112269	7	160	Cellular developmental process	SOLYC01G111500.3 SOLYC05G007690.2 SOLYC05G007710.3 SOLYC05G009170.2 SOLYC10G055410.2 SOLYC05G052520.3 SOLYC09G005120.3
0.00245377	24	1708	Regulation of gene expression	SOLYC01G100460.3 SOLYC06G074030.1 SOLYC08G080540.3 SOLYC10G008260.2 SOLYC10G079380.2 SOLYC11G006230.2 SOLYC11G072630.2 SOLYC02G069260.3 SOLYC02G089420.1 SOLYC03G093610.1 SOLYC03G116890.3 SOLYC03G119390.3 SOLYC03G121400.1 SOLYC04G072900.1 SOLYC06G065820.3 SOLYC07G053610.3 SOLYC09G008810.3 SOLYC09G011170.3 SOLYC09G015770.3 SOLYC10G006130.1 SOLYC10G050970.1 SOLYC11G012980.1 SOLYC12G009240.1 SOLYC12G…
0.00258165	14	717	Signal transduction	SOLYC02G064980.1 SOLYC02G090970.1 SOLYC02G090990.1 SOLYC03G096630.1 SOLYC03G117640.1 SOLYC05G009170.2 SOLYC09G065630.3 SOLYC09G098170.3 SOLYC10G080880.2 SOLYC11G072630.2 SOLYC03G093610.1 SOLYC03G112310.1 SOLYC05G052520.3 SOLYC09G075440.3
0.00265982	14	721	Signaling	SOLYC02G064980.1 SOLYC02G090970.1 SOLYC02G090990.1 SOLYC03G096630.1 SOLYC03G117640.1 SOLYC05G009170.2 SOLYC09G065630.3 SOLYC09G098170.3 SOLYC10G080880.2 SOLYC11G072630.2 SOLYC03G093610.1 SOLYC03G112310.1 SOLYC05G052520.3 SOLYC09G075440.3
0.00321945	4	47	Stress-activated protein kinase signaling cascade	SOLYC02G064980.1 SOLYC02G090970.1 SOLYC02G090990.1 SOLYC03G117640.1
0.00365632	9	333	Intracellular signal transduction	SOLYC02G064980.1 SOLYC02G090970.1 SOLYC02G090990.1 SOLYC03G096630.1 SOLYC03G117640.1 SOLYC09G098170.3 SOLYC11G072630.2 SOLYC03G093610.1 SOLYC09G075440.3
0.00388536	6	142	Cell differentiation	SOLYC01G111500.3 SOLYC05G007690.2 SOLYC05G007710.3 SOLYC05G009170.2 SOLYC10G055410.2 SOLYC09G005120.3
0.003929	22	1563	Regulation of cellular macromolecule biosynthetic process	SOLYC01G100460.3 SOLYC06G074030.1 SOLYC08G080540.3 SOLYC10G008260.2 SOLYC10G079380.2 SOLYC11G006230.2 SOLYC02G089420.1 SOLYC03G093610.1 SOLYC03G116890.3 SOLYC03G119390.3 SOLYC03G121400.1 SOLYC04G072900.1 SOLYC06G065820.3 SOLYC07G053610.3 SOLYC09G008810.3 SOLYC09G011170.3 SOLYC09G015770.3 SOLYC10G006130.1 SOLYC10G050970.1 SOLYC11G012980.1 SOLYC12G009240.1 SOLYC12G049560.2
0.00400751	22	1568	Regulation of macromolecule biosynthetic process	SOLYC01G100460.3 SOLYC06G074030.1 SOLYC08G080540.3 SOLYC10G008260.2 SOLYC10G079380.2 SOLYC11G006230.2 SOLYC02G089420.1 SOLYC03G093610.1 SOLYC03G116890.3 SOLYC03G119390.3 SOLYC03G121400.1 SOLYC04G072900.1 SOLYC06G065820.3 SOLYC07G053610.3 SOLYC09G008810.3 SOLYC09G011170.3 SOLYC09G015770.3 SOLYC10G006130.1 SOLYC10G050970.1 SOLYC11G012980.1 SOLYC12G009240.1 SOLYC12G049560.2
0.00422235	22	1587	Regulation of cellular biosynthetic process	SOLYC01G100460.3 SOLYC06G074030.1 SOLYC08G080540.3 SOLYC10G008260.2 SOLYC10G079380.2 SOLYC11G006230.2 SOLYC02G089420.1 SOLYC03G093610.1 SOLYC03G116890.3 SOLYC03G119390.3 SOLYC03G121400.1 SOLYC04G072900.1 SOLYC06G065820.3 SOLYC07G053610.3 SOLYC09G008810.3 SOLYC09G011170.3 SOLYC09G015770.3 SOLYC10G006130.1 SOLYC10G050970.1 SOLYC11G012980.1 SOLYC12G009240.1 SOLYC12G049560.2
0.00422235	21	1475	Regulation of transcription, DNA-templated	SOLYC01G100460.3 SOLYC08G080540.3 SOLYC10G008260.2 SOLYC10G079380.2 SOLYC11G006230.2 SOLYC02G089420.1 SOLYC03G093610.1 SOLYC03G116890.3 SOLYC03G119390.3 SOLYC03G121400.1 SOLYC04G072900.1 SOLYC06G065820.3 SOLYC07G053610.3 SOLYC09G008810.3 SOLYC09G011170.3 SOLYC09G015770.3 SOLYC10G006130.1 SOLYC10G050970.1 SOLYC11G012980.1 SOLYC12G009240.1 SOLYC12G049560.2
0.00422235	21	1477	Regulation of nucleic acid-templated transcription	SOLYC01G100460.3 SOLYC08G080540.3 SOLYC10G008260.2 SOLYC10G079380.2 SOLYC11G006230.2 SOLYC02G089420.1 SOLYC03G093610.1 SOLYC03G116890.3 SOLYC03G119390.3 SOLYC03G121400.1 SOLYC04G072900.1 SOLYC06G065820.3 SOLYC07G053610.3 SOLYC09G008810.3 SOLYC09G011170.3 SOLYC09G015770.3 SOLYC10G006130.1 SOLYC10G050970.1 SOLYC11G012980.1 SOLYC12G009240.1 SOLYC12G049560.2
0.00422235	21	1477	Regulation of RNA biosynthetic process	SOLYC01G100460.3 SOLYC08G080540.3 SOLYC10G008260.2 SOLYC10G079380.2 SOLYC11G006230.2 SOLYC02G089420.1 SOLYC03G093610.1 SOLYC03G116890.3 SOLYC03G119390.3 SOLYC03G121400.1 SOLYC04G072900.1 SOLYC06G065820.3 SOLYC07G053610.3 SOLYC09G008810.3 SOLYC09G011170.3 SOLYC09G015770.3 SOLYC10G006130.1 SOLYC10G050970.1 SOLYC11G012980.1 SOLYC12G009240.1 SOLYC12G049560.2
0.00422235	3	22	Ethylene-activated signaling pathway	SOLYC03G096630.1 SOLYC03G093610.1 SOLYC09G075440.3
0.0043152	22	1592	Regulation of biosynthetic process	SOLYC01G100460.3 SOLYC06G074030.1 SOLYC08G080540.3 SOLYC10G008260.2 SOLYC10G079380.2 SOLYC11G006230.2 SOLYC02G089420.1 SOLYC03G093610.1 SOLYC03G116890.3 SOLYC03G119390.3 SOLYC03G121400.1 SOLYC04G072900.1 SOLYC06G065820.3 SOLYC07G053610.3 SOLYC09G008810.3 SOLYC09G011170.3 SOLYC09G015770.3 SOLYC10G006130.1 SOLYC10G050970.1 SOLYC11G012980.1 SOLYC12G009240.1 SOLYC12G049560.2
0.00451638	26	2049	Aromatic compound biosynthetic process	SOLYC01G086650.3 SOLYC01G100460.3 SOLYC03G120090.1 SOLYC08G080540.3 SOLYC10G008260.2 SOLYC10G079380.2 SOLYC11G006230.2 SOLYC12G041960.2 SOLYC02G089420.1 SOLYC02G093250.3 SOLYC03G093610.1 SOLYC03G116890.3 SOLYC03G119390.3 SOLYC03G121400.1 SOLYC04G072900.1 SOLYC04G076970.3 SOLYC06G065820.3 SOLYC07G053610.3 SOLYC09G008810.3 SOLYC09G011170.3 SOLYC09G015770.3 SOLYC10G006130.1 SOLYC10G050970.1 SOLYC11G…
0.00503644	21	1508	Regulation of RNA metabolic process	SOLYC01G100460.3 SOLYC08G080540.3 SOLYC10G008260.2 SOLYC10G079380.2 SOLYC11G006230.2 SOLYC02G089420.1 SOLYC03G093610.1 SOLYC03G116890.3 SOLYC03G119390.3 SOLYC03G121400.1 SOLYC04G072900.1 SOLYC06G065820.3 SOLYC07G053610.3 SOLYC09G008810.3 SOLYC09G011170.3 SOLYC09G015770.3 SOLYC10G006130.1 SOLYC10G050970.1 SOLYC11G012980.1 SOLYC12G009240.1 SOLYC12G049560.2
0.00503644	3	24	Cellular response to ethylene stimulus	SOLYC03G096630.1 SOLYC03G093610.1 SOLYC09G075440.3
0.00566862	4	59	Activation of protein kinase activity	SOLYC02G064980.1 SOLYC02G090970.1 SOLYC02G090990.1 SOLYC03G117640.1
0.00595855	21	1533	Regulation of nucleobase-containing compound metabolic process	SOLYC01G100460.3 SOLYC08G080540.3 SOLYC10G008260.2 SOLYC10G079380.2 SOLYC11G006230.2 SOLYC02G089420.1 SOLYC03G093610.1 SOLYC03G116890.3 SOLYC03G119390.3 SOLYC03G121400.1 SOLYC04G072900.1 SOLYC06G065820.3 SOLYC07G053610.3 SOLYC09G008810.3 SOLYC09G011170.3 SOLYC09G015770.3 SOLYC10G006130.1 SOLYC10G050970.1 SOLYC11G012980.1 SOLYC12G009240.1 SOLYC12G049560.2
0.00595855	5	107	Regulation of protein kinase activity	SOLYC02G064980.1 SOLYC02G090970.1 SOLYC02G090990.1 SOLYC03G117640.1 SOLYC04G078310.3
0.00595855	10	454	Response to abiotic stimulus	SOLYC02G083860.3 SOLYC06G076020.3 SOLYC08G080540.3 SOLYC09G075950.1 SOLYC10G079380.2 SOLYC10G086410.3 SOLYC11G066100.2 SOLYC09G005120.3 SOLYC11G065620.2 SOLYC11G071830.2
0.00605081	5	108	Regulation of kinase activity	SOLYC02G064980.1 SOLYC02G090970.1 SOLYC02G090990.1 SOLYC03G117640.1 SOLYC04G078310.3
0.0063373	7	231	Hormone-mediated signaling pathway	SOLYC03G096630.1 SOLYC05G009170.2 SOLYC09G065630.3 SOLYC10G080880.2 SOLYC03G093610.1 SOLYC05G052520.3 SOLYC09G075440.3
0.00665812	3	28	Drug transport	SOLYC03G118970.3 SOLYC11G010380.2 SOLYC12G005850.2
0.00665812	3	28	Response to drug	SOLYC03G118970.3 SOLYC11G010380.2 SOLYC12G005850.2
0.00665812	4	65	Positive regulation of protein kinase activity	SOLYC02G064980.1 SOLYC02G090970.1 SOLYC02G090990.1 SOLYC03G117640.1
0.00665812	22	1677	Transcription, DNA-templated	SOLYC01G100460.3 SOLYC08G080540.3 SOLYC10G008260.2 SOLYC10G079380.2 SOLYC11G006230.2 SOLYC02G089420.1 SOLYC03G093610.1 SOLYC03G116890.3 SOLYC03G119390.3 SOLYC03G121400.1 SOLYC04G072900.1 SOLYC04G076970.3 SOLYC06G065820.3 SOLYC07G053610.3 SOLYC09G008810.3 SOLYC09G011170.3 SOLYC09G015770.3 SOLYC10G006130.1 SOLYC10G050970.1 SOLYC11G012980.1 SOLYC12G009240.1 SOLYC12G049560.2
0.00665812	22	1679	Nucleic acid-templated transcription	SOLYC01G100460.3 SOLYC08G080540.3 SOLYC10G008260.2 SOLYC10G079380.2 SOLYC11G006230.2 SOLYC02G089420.1 SOLYC03G093610.1 SOLYC03G116890.3 SOLYC03G119390.3 SOLYC03G121400.1 SOLYC04G072900.1 SOLYC04G076970.3 SOLYC06G065820.3 SOLYC07G053610.3 SOLYC09G008810.3 SOLYC09G011170.3 SOLYC09G015770.3 SOLYC10G006130.1 SOLYC10G050970.1 SOLYC11G012980.1 SOLYC12G009240.1 SOLYC12G049560.2
0.00665812	26	2138	Organic cyclic compound biosynthetic process	SOLYC01G086650.3 SOLYC01G100460.3 SOLYC03G120090.1 SOLYC08G080540.3 SOLYC10G008260.2 SOLYC10G079380.2 SOLYC11G006230.2 SOLYC02G086770.3 SOLYC02G089420.1 SOLYC02G093250.3 SOLYC03G093610.1 SOLYC03G116890.3 SOLYC03G119390.3 SOLYC03G121400.1 SOLYC04G072900.1 SOLYC04G076970.3 SOLYC06G065820.3 SOLYC07G053610.3 SOLYC09G008810.3 SOLYC09G011170.3 SOLYC09G015770.3 SOLYC10G006130.1 SOLYC10G050970.1 SOLYC11G…
0.00665812	3	28	Drug transmembrane transport	SOLYC03G118970.3 SOLYC11G010380.2 SOLYC12G005850.2
0.00669163	22	1683	RNA biosynthetic process	SOLYC01G100460.3 SOLYC08G080540.3 SOLYC10G008260.2 SOLYC10G079380.2 SOLYC11G006230.2 SOLYC02G089420.1 SOLYC03G093610.1 SOLYC03G116890.3 SOLYC03G119390.3 SOLYC03G121400.1 SOLYC04G072900.1 SOLYC04G076970.3 SOLYC06G065820.3 SOLYC07G053610.3 SOLYC09G008810.3 SOLYC09G011170.3 SOLYC09G015770.3 SOLYC10G006130.1 SOLYC10G050970.1 SOLYC11G012980.1 SOLYC12G009240.1 SOLYC12G049560.2
0.00684021	4	66	Positive regulation of kinase activity	SOLYC02G064980.1 SOLYC02G090970.1 SOLYC02G090990.1 SOLYC03G117640.1
0.00708766	7	242	Cellular response to hormone stimulus	SOLYC03G096630.1 SOLYC05G009170.2 SOLYC09G065630.3 SOLYC10G080880.2 SOLYC03G093610.1 SOLYC05G052520.3 SOLYC09G075440.3
0.00732984	4	69	Positive regulation of phosphorus metabolic process	SOLYC02G064980.1 SOLYC02G090970.1 SOLYC02G090990.1 SOLYC03G117640.1
0.00732984	4	68	Positive regulation of protein phosphorylation	SOLYC02G064980.1 SOLYC02G090970.1 SOLYC02G090990.1 SOLYC03G117640.1
0.00732984	4	69	Positive regulation of phosphorylation	SOLYC02G064980.1 SOLYC02G090970.1 SOLYC02G090990.1 SOLYC03G117640.1
0.00732984	4	69	Positive regulation of phosphate metabolic process	SOLYC02G064980.1 SOLYC02G090970.1 SOLYC02G090990.1 SOLYC03G117640.1
0.00732984	7	247	Regulation of catalytic activity	SOLYC02G064980.1 SOLYC02G090970.1 SOLYC02G090990.1 SOLYC03G117640.1 SOLYC04G078310.3 SOLYC08G006690.1 SOLYC03G020010.1
0.00732984	5	118	Regulation of transferase activity	SOLYC02G064980.1 SOLYC02G090970.1 SOLYC02G090990.1 SOLYC03G117640.1 SOLYC04G078310.3
0.00775667	7	250	Cellular response to endogenous stimulus	SOLYC03G096630.1 SOLYC05G009170.2 SOLYC09G065630.3 SOLYC10G080880.2 SOLYC03G093610.1 SOLYC05G052520.3 SOLYC09G075440.3
0.00858369	7	255	Regulation of molecular function	SOLYC02G064980.1 SOLYC02G090970.1 SOLYC02G090990.1 SOLYC03G117640.1 SOLYC04G078310.3 SOLYC08G006690.1 SOLYC03G020010.1
0.00893912	5	126	Regulation of protein phosphorylation	SOLYC02G064980.1 SOLYC02G090970.1 SOLYC02G090990.1 SOLYC03G117640.1 SOLYC04G078310.3
0.00913954	5	127	Regulation of phosphorylation	SOLYC02G064980.1 SOLYC02G090970.1 SOLYC02G090990.1 SOLYC03G117640.1 SOLYC04G078310.3
0.0093513	4	75	Positive regulation of transferase activity	SOLYC02G064980.1 SOLYC02G090970.1 SOLYC02G090990.1 SOLYC03G117640.1
0.0106149	7	267	Regulation of cellular protein metabolic process	SOLYC02G064980.1 SOLYC02G090970.1 SOLYC02G090990.1 SOLYC03G117640.1 SOLYC04G078310.3 SOLYC06G074030.1 SOLYC03G020010.1
0.0110741	12	704	Developmental process	SOLYC01G111500.3 SOLYC05G007690.2 SOLYC05G007710.3 SOLYC05G009170.2 SOLYC10G055410.2 SOLYC11G006230.2 SOLYC03G093610.1 SOLYC05G007450.3 SOLYC05G052520.3 SOLYC09G005120.3 SOLYC11G072630.2 SOLYC12G096570.1
0.012021	24	2028	Heterocycle biosynthetic process	SOLYC01G086650.3 SOLYC01G100460.3 SOLYC03G120090.1 SOLYC08G080540.3 SOLYC10G008260.2 SOLYC10G079380.2 SOLYC11G006230.2 SOLYC02G089420.1 SOLYC03G093610.1 SOLYC03G116890.3 SOLYC03G119390.3 SOLYC03G121400.1 SOLYC04G072900.1 SOLYC04G076970.3 SOLYC06G065820.3 SOLYC07G053610.3 SOLYC09G008810.3 SOLYC09G011170.3 SOLYC09G015770.3 SOLYC10G006130.1 SOLYC10G050970.1 SOLYC11G012980.1 SOLYC12G009240.1 SOLYC12G…
0.0126066	7	277	Regulation of protein metabolic process	SOLYC02G064980.1 SOLYC02G090970.1 SOLYC02G090990.1 SOLYC03G117640.1 SOLYC04G078310.3 SOLYC06G074030.1 SOLYC03G020010.1
0.0139599	4	85	Positive regulation of protein modification process	SOLYC02G064980.1 SOLYC02G090970.1 SOLYC02G090990.1 SOLYC03G117640.1
0.0149179	3	41	Response to ethylene	SOLYC03G096630.1 SOLYC03G093610.1 SOLYC09G075440.3
0.0159334	10	549	Positive regulation of biological process	SOLYC01G100460.3 SOLYC02G064980.1 SOLYC02G090970.1 SOLYC02G090990.1 SOLYC03G117640.1 SOLYC04G078310.3 SOLYC08G080540.3 SOLYC10G079380.2 SOLYC11G006230.2 SOLYC12G096570.1
0.017961	37	3757	Biosynthetic process	SOLYC01G086650.3 SOLYC01G100460.3 SOLYC02G083860.3 SOLYC03G120090.1 SOLYC05G007450.3 SOLYC06G074030.1 SOLYC07G017610.3 SOLYC07G065980.3 SOLYC08G080540.3 SOLYC10G008260.2 SOLYC10G079380.2 SOLYC11G006230.2 SOLYC11G065620.2 SOLYC12G014430.2 SOLYC12G041960.2 SOLYC02G082850.3 SOLYC02G086770.3 SOLYC02G089420.1 SOLYC02G093250.3 SOLYC03G093610.1 SOLYC03G116890.3 SOLYC03G119390.3 SOLYC03G121400.1 SOLYC04G…
0.0196521	9	476	Positive regulation of cellular process	SOLYC01G100460.3 SOLYC02G064980.1 SOLYC02G090970.1 SOLYC02G090990.1 SOLYC03G117640.1 SOLYC04G078310.3 SOLYC08G080540.3 SOLYC10G079380.2 SOLYC11G006230.2
0.0196521	8	387	Positive regulation of nitrogen compound metabolic process	SOLYC01G100460.3 SOLYC02G064980.1 SOLYC02G090970.1 SOLYC02G090990.1 SOLYC03G117640.1 SOLYC08G080540.3 SOLYC10G079380.2 SOLYC11G006230.2
0.0196521	36	3652	Organic substance biosynthetic process	SOLYC01G086650.3 SOLYC01G100460.3 SOLYC02G083860.3 SOLYC03G120090.1 SOLYC05G007450.3 SOLYC06G074030.1 SOLYC07G017610.3 SOLYC07G065980.3 SOLYC08G080540.3 SOLYC10G008260.2 SOLYC10G079380.2 SOLYC11G006230.2 SOLYC11G065620.2 SOLYC12G014430.2 SOLYC02G082850.3 SOLYC02G086770.3 SOLYC02G089420.1 SOLYC02G093250.3 SOLYC03G093610.1 SOLYC03G116890.3 SOLYC03G119390.3 SOLYC03G121400.1 SOLYC04G072900.1 SOLYC04G…
0.0205677	22	1889	Nucleobase-containing compound biosynthetic process	SOLYC01G100460.3 SOLYC08G080540.3 SOLYC10G008260.2 SOLYC10G079380.2 SOLYC11G006230.2 SOLYC02G089420.1 SOLYC03G093610.1 SOLYC03G116890.3 SOLYC03G119390.3 SOLYC03G121400.1 SOLYC04G072900.1 SOLYC04G076970.3 SOLYC06G065820.3 SOLYC07G053610.3 SOLYC09G008810.3 SOLYC09G011170.3 SOLYC09G015770.3 SOLYC10G006130.1 SOLYC10G050970.1 SOLYC11G012980.1 SOLYC12G009240.1 SOLYC12G049560.2
0.0208262	8	393	Positive regulation of cellular metabolic process	SOLYC01G100460.3 SOLYC02G064980.1 SOLYC02G090970.1 SOLYC02G090990.1 SOLYC03G117640.1 SOLYC08G080540.3 SOLYC10G079380.2 SOLYC11G006230.2
0.0212416	8	395	Positive regulation of macromolecule metabolic process	SOLYC01G100460.3 SOLYC02G064980.1 SOLYC02G090970.1 SOLYC02G090990.1 SOLYC03G117640.1 SOLYC08G080540.3 SOLYC10G079380.2 SOLYC11G006230.2
0.0216659	5	162	Regulation of phosphate metabolic process	SOLYC02G064980.1 SOLYC02G090970.1 SOLYC02G090990.1 SOLYC03G117640.1 SOLYC04G078310.3
0.0216659	5	162	Regulation of phosphorus metabolic process	SOLYC02G064980.1 SOLYC02G090970.1 SOLYC02G090990.1 SOLYC03G117640.1 SOLYC04G078310.3
0.0249865	8	408	Positive regulation of metabolic process	SOLYC01G100460.3 SOLYC02G064980.1 SOLYC02G090970.1 SOLYC02G090990.1 SOLYC03G117640.1 SOLYC08G080540.3 SOLYC10G079380.2 SOLYC11G006230.2
0.0305696	4	110	Positive regulation of catalytic activity	SOLYC02G064980.1 SOLYC02G090970.1 SOLYC02G090990.1 SOLYC03G117640.1
0.0312701	5	178	Regulation of protein modification process	SOLYC02G064980.1 SOLYC02G090970.1 SOLYC02G090990.1 SOLYC03G117640.1 SOLYC04G078310.3
0.0339647	4	114	Positive regulation of molecular function	SOLYC02G064980.1 SOLYC02G090970.1 SOLYC02G090990.1 SOLYC03G117640.1
0.0368291	4	117	Positive regulation of cellular protein metabolic process	SOLYC02G064980.1 SOLYC02G090970.1 SOLYC02G090990.1 SOLYC03G117640.1
0.0373795	34	3559	Cellular biosynthetic process	SOLYC01G086650.3 SOLYC01G100460.3 SOLYC03G120090.1 SOLYC05G007450.3 SOLYC06G074030.1 SOLYC07G017610.3 SOLYC08G080540.3 SOLYC10G008260.2 SOLYC10G079380.2 SOLYC11G006230.2 SOLYC11G065620.2 SOLYC12G014430.2 SOLYC12G041960.2 SOLYC02G082850.3 SOLYC02G089420.1 SOLYC02G093250.3 SOLYC03G093610.1 SOLYC03G116890.3 SOLYC03G119390.3 SOLYC03G121400.1 SOLYC04G072900.1 SOLYC04G076970.3 SOLYC05G013207.1 SOLYC06G…
0.0374538	7	351	Defense response	SOLYC03G112310.1 SOLYC09G065630.3 SOLYC07G008620.1 SOLYC03G093610.1 SOLYC04G072900.1 SOLYC06G065820.3 SOLYC07G007760.3
0.0401959	4	121	Positive regulation of protein metabolic process	SOLYC02G064980.1 SOLYC02G090970.1 SOLYC02G090990.1 SOLYC03G117640.1
0.0420842	5	194	Response to auxin	SOLYC10G080880.2 SOLYC01G110800.3 SOLYC01G110920.3 SOLYC01G110930.1 SOLYC03G123550.1
0.0425848	2	21	Positive regulation of transcription from RNA polymerase II promoter in response to stress	SOLYC08G080540.3 SOLYC10G079380.2
0.0425848	2	21	Positive regulation of transcription from RNA polymerase II promoter in response to heat stress	SOLYC08G080540.3 SOLYC10G079380.2
0.0457834	2	22	Regulation of transcription from RNA polymerase II promoter in response to stress	SOLYC08G080540.3 SOLYC10G079380.2
0.0457834	2	22	Regulation of DNA-templated transcription in response to stress	SOLYC08G080540.3 SOLYC10G079380.2

## Sheet: GOCC enrichment
					GOCC terms enrichment analysis of DEGs
Enrichment FDR	Genes in list	Total genes	Functional Category	Genes
7.57384e-06	40	2634	Nucleus	SOLYC01G100460.3 SOLYC01G111500.3 SOLYC03G043700.3 SOLYC03G114160.1 SOLYC04G072900.1 SOLYC04G078310.3 SOLYC05G007450.3 SOLYC05G007690.2 SOLYC05G007710.3 SOLYC05G009170.2 SOLYC08G080540.3 SOLYC09G008070.3 SOLYC09G056450.3 SOLYC09G065630.3 SOLYC10G048190.1 SOLYC10G055410.2 SOLYC10G079380.2 SOLYC11G006230.2 SOLYC11G012510.2 SOLYC11G072630.2 SOLYC10G085870.1 SOLYC03G093610.1 SOLYC03G096630.1 SOLYC03G…
0.00549026	44	4064	Cytoplasm	SOLYC01G100210.3 SOLYC02G064980.1 SOLYC02G077670.3 SOLYC02G082850.3 SOLYC02G090970.1 SOLYC02G090990.1 SOLYC03G043700.3 SOLYC03G097410.1 SOLYC03G113100.3 SOLYC03G114160.1 SOLYC03G117640.1 SOLYC04G006940.3 SOLYC04G078310.3 SOLYC06G054670.2 SOLYC06G074030.1 SOLYC06G076020.3 SOLYC07G017610.3 SOLYC07G064600.3 SOLYC08G006150.3 SOLYC09G008070.3 SOLYC09G011030.3 SOLYC09G056450.3 SOLYC09G061760.1 SOLYC09G…

## Sheet: GOMF enrichment
			GOMF terms enrichment analysis of DEGs
Enrichment FDR	Genes in list	Total genes	Functional Category	Genes
6.66099e-08	30	1265	Molecular function regulator	SOLYC01G100460.3 SOLYC03G096630.1 SOLYC03G119390.3 SOLYC04G078310.3 SOLYC05G009170.2 SOLYC08G006690.1 SOLYC08G080540.3 SOLYC09G011030.3 SOLYC10G079380.2 SOLYC11G005770.2 SOLYC11G012510.2 SOLYC02G089420.1 SOLYC03G020010.1 SOLYC03G020030.3 SOLYC03G093610.1 SOLYC03G116890.3 SOLYC04G072900.1 SOLYC06G065820.3 SOLYC06G072220.1 SOLYC06G072230.1 SOLYC09G008810.3 SOLYC09G011170.3 SOLYC09G015770.3 SOLYC10G…
1.36392e-06	6	26	Heat shock protein binding	SOLYC06G076020.3 SOLYC09G075950.1 SOLYC10G086410.3 SOLYC11G066100.2 SOLYC10G078930.2 SOLYC11G071830.2
2.61387e-06	20	730	DNA-binding transcription factor activity	SOLYC01G100460.3 SOLYC03G096630.1 SOLYC03G119390.3 SOLYC05G009170.2 SOLYC08G080540.3 SOLYC10G079380.2 SOLYC11G012510.2 SOLYC02G089420.1 SOLYC03G093610.1 SOLYC03G116890.3 SOLYC04G072900.1 SOLYC06G065820.3 SOLYC09G008810.3 SOLYC09G011170.3 SOLYC09G015770.3 SOLYC10G006130.1 SOLYC10G050970.1 SOLYC11G012980.1 SOLYC12G009240.1 SOLYC12G049560.2
4.27436e-06	21	842	Transcription regulator activity	SOLYC01G100460.3 SOLYC03G096630.1 SOLYC03G119390.3 SOLYC05G009170.2 SOLYC08G080540.3 SOLYC10G079380.2 SOLYC11G012510.2 SOLYC02G089420.1 SOLYC03G093610.1 SOLYC03G116890.3 SOLYC04G072900.1 SOLYC06G065820.3 SOLYC09G008810.3 SOLYC09G011170.3 SOLYC09G015770.3 SOLYC10G006130.1 SOLYC10G050970.1 SOLYC11G006230.2 SOLYC11G012980.1 SOLYC12G009240.1 SOLYC12G049560.2
5.92134e-06	18	644	Sequence-specific DNA binding	SOLYC01G100460.3 SOLYC01G111500.3 SOLYC03G119390.3 SOLYC04G072900.1 SOLYC05G007450.3 SOLYC05G007690.2 SOLYC05G007710.3 SOLYC05G009170.2 SOLYC08G080540.3 SOLYC10G008260.2 SOLYC10G055410.2 SOLYC10G079380.2 SOLYC11G012510.2 SOLYC03G116890.3 SOLYC04G076970.3 SOLYC09G008810.3 SOLYC09G015770.3 SOLYC10G006130.1
1.24017e-05	4	10	Misfolded protein binding	SOLYC06G076020.3 SOLYC09G075950.1 SOLYC10G086410.3 SOLYC11G066100.2
2.43878e-05	32	2012	DNA binding	SOLYC01G100460.3 SOLYC01G111500.3 SOLYC03G096630.1 SOLYC03G119390.3 SOLYC04G072900.1 SOLYC05G007450.3 SOLYC05G007690.2 SOLYC05G007710.3 SOLYC05G009170.2 SOLYC08G080540.3 SOLYC10G008260.2 SOLYC10G055410.2 SOLYC10G079380.2 SOLYC11G012510.2 SOLYC03G093610.1 SOLYC03G116890.3 SOLYC03G121400.1 SOLYC04G014260.2 SOLYC04G076970.3 SOLYC04G078420.1 SOLYC04G079360.1 SOLYC05G007580.1 SOLYC06G065820.3 SOLYC07G…
2.43878e-05	4	12	Protein folding chaperone	SOLYC06G076020.3 SOLYC09G075950.1 SOLYC10G086410.3 SOLYC11G066100.2
0.00193386	6	111	Unfolded protein binding	SOLYC02G077670.3 SOLYC06G076020.3 SOLYC09G075950.1 SOLYC10G086410.3 SOLYC11G066100.2 SOLYC11G071830.2
0.012287	4	63	Endopeptidase inhibitor activity	SOLYC03G020010.1 SOLYC03G020030.3 SOLYC06G072220.1 SOLYC06G072230.1
0.012287	7	223	UDP-glycosyltransferase activity	SOLYC01G095620.3 SOLYC07G043480.1 SOLYC08G006410.3 SOLYC10G085870.1 SOLYC12G014010.2 SOLYC12G042600.2 SOLYC12G014430.2
0.012287	9	375	Enzyme regulator activity	SOLYC04G078310.3 SOLYC08G006690.1 SOLYC09G011030.3 SOLYC11G005770.2 SOLYC03G020010.1 SOLYC03G020030.3 SOLYC06G072220.1 SOLYC06G072230.1 SOLYC10G078930.2
0.012287	4	63	Peptidase inhibitor activity	SOLYC03G020010.1 SOLYC03G020030.3 SOLYC06G072220.1 SOLYC06G072230.1
0.012287	4	65	Peptidase regulator activity	SOLYC03G020010.1 SOLYC03G020030.3 SOLYC06G072220.1 SOLYC06G072230.1
0.012287	4	64	Endopeptidase regulator activity	SOLYC03G020010.1 SOLYC03G020030.3 SOLYC06G072220.1 SOLYC06G072230.1
0.0227972	6	196	Enzyme inhibitor activity	SOLYC08G006690.1 SOLYC11G005770.2 SOLYC03G020010.1 SOLYC03G020030.3 SOLYC06G072220.1 SOLYC06G072230.1
0.0246766	3	38	Chaperone binding	SOLYC02G077670.3 SOLYC10G078930.2 SOLYC10G084170.1
0.0246766	3	39	Quercetin 3-O-glucosyltransferase activity	SOLYC01G095620.3 SOLYC08G006410.3 SOLYC10G085870.1
0.0246766	3	39	Quercetin 7-O-glucosyltransferase activity	SOLYC01G095620.3 SOLYC08G006410.3 SOLYC10G085870.1
0.0300118	9	460	Protein serine/threonine kinase activity	SOLYC01G094020.3 SOLYC02G064980.1 SOLYC02G090970.1 SOLYC02G090990.1 SOLYC03G112310.1 SOLYC03G117640.1 SOLYC07G063770.3 SOLYC11G072630.2 SOLYC12G005450.1
0.0353261	2	13	ATPase regulator activity	SOLYC09G011030.3 SOLYC10G078930.2
0.0387479	34	3424	Nucleic acid binding	SOLYC01G100460.3 SOLYC01G111500.3 SOLYC03G096630.1 SOLYC03G119390.3 SOLYC04G072900.1 SOLYC05G007450.3 SOLYC05G007690.2 SOLYC05G007710.3 SOLYC05G009170.2 SOLYC08G080540.3 SOLYC10G008260.2 SOLYC10G055410.2 SOLYC10G079380.2 SOLYC11G012510.2 SOLYC02G069260.3 SOLYC03G093610.1 SOLYC03G116890.3 SOLYC03G121400.1 SOLYC04G014260.2 SOLYC04G076970.3 SOLYC04G078420.1 SOLYC04G079360.1 SOLYC05G007580.1 SOLYC06G…
0.0387479	5	161	Sequence-specific double-stranded DNA binding	SOLYC01G100460.3 SOLYC05G007450.3 SOLYC08G080540.3 SOLYC10G008260.2 SOLYC10G079380.2
0.0479513	4	107	UDP-glucosyltransferase activity	SOLYC01G095620.3 SOLYC08G006410.3 SOLYC10G085870.1 SOLYC12G014430.2
