# Supplementary material for: β-Cyclocitral, a Master Regulator of Multiple Stress-Responsive Genes in Solanum lycopersicum L. Plants
Source: Plants (Basel). 2021 Nov 15;10(11):2465. doi: 10.3390/plants10112465 (PMC8618229; doi:10.3390/plants10112465)
Supplement: Supplementary file 1 [file plants-10-02465-s001.zip › Supplemental Data S3.xlsx]

## Sheet: Overall enrichment_upregulated
			Overall enrichment of upregulated genes
Enrichment FDR	Genes in list	Total genes	Functional Category	Genes
1.74866e-07	6	26	Heat shock protein binding	SOLYC06G076020.3 SOLYC09G075950.1 SOLYC10G078930.2 SOLYC10G086410.3 SOLYC11G066100.2 SOLYC11G071830.2
2.75841e-07	6	31	Chaperone-mediated protein folding	SOLYC02G077670.3 SOLYC06G076020.3 SOLYC09G075950.1 SOLYC09G092690.3 SOLYC10G086410.3 SOLYC11G066100.2
6.65789e-07	16	730	DNA-binding transcription factor activity	SOLYC03G093610.1 SOLYC03G096630.1 SOLYC03G116890.3 SOLYC03G119390.3 SOLYC04G072900.1 SOLYC05G009170.2 SOLYC06G065820.3 SOLYC08G080540.3 SOLYC09G011170.3 SOLYC09G015770.3 SOLYC10G006130.1 SOLYC10G050970.1 SOLYC11G012510.2 SOLYC11G012980.1 SOLYC12G009240.1 SOLYC12G049560.2
7.89515e-07	14	564	Response to organic substance	SOLYC01G110800.3 SOLYC01G110920.3 SOLYC01G110930.1 SOLYC03G093610.1 SOLYC03G096630.1 SOLYC03G123550.1 SOLYC05G009170.2 SOLYC05G052520.3 SOLYC06G076020.3 SOLYC09G008070.3 SOLYC09G075440.3 SOLYC09G075950.1 SOLYC10G086410.3 SOLYC11G066100.2
7.89515e-07	5	22	Response to topologically incorrect protein	SOLYC06G076020.3 SOLYC09G008070.3 SOLYC09G075950.1 SOLYC10G086410.3 SOLYC11G066100.2
7.89515e-07	5	22	Cellular response to topologically incorrect protein	SOLYC06G076020.3 SOLYC09G008070.3 SOLYC09G075950.1 SOLYC10G086410.3 SOLYC11G066100.2
7.89515e-07	5	22	de novo posttranslational protein folding	SOLYC02G077670.3 SOLYC06G076020.3 SOLYC09G075950.1 SOLYC10G086410.3 SOLYC11G066100.2
7.89515e-07	5	22	Chaperone cofactor-dependent protein refolding	SOLYC02G077670.3 SOLYC06G076020.3 SOLYC09G075950.1 SOLYC10G086410.3 SOLYC11G066100.2
8.07243e-07	26	2184	Response to stimulus	SOLYC01G110800.3 SOLYC01G110920.3 SOLYC01G110930.1 SOLYC02G064980.1 SOLYC02G090970.1 SOLYC02G090990.1 SOLYC03G093610.1 SOLYC03G096630.1 SOLYC03G112310.1 SOLYC03G113100.3 SOLYC03G117640.1 SOLYC03G123550.1 SOLYC04G072900.1 SOLYC05G009170.2 SOLYC05G052520.3 SOLYC06G065820.3 SOLYC06G076020.3 SOLYC07G008620.1 SOLYC08G080540.3 SOLYC09G005120.3 SOLYC09G008070.3 SOLYC09G075440.3 SOLYC09G075950.1 SOLYC10G…
1.33944e-06	16	842	Transcription regulator activity	SOLYC03G093610.1 SOLYC03G096630.1 SOLYC03G116890.3 SOLYC03G119390.3 SOLYC04G072900.1 SOLYC05G009170.2 SOLYC06G065820.3 SOLYC08G080540.3 SOLYC09G011170.3 SOLYC09G015770.3 SOLYC10G006130.1 SOLYC10G050970.1 SOLYC11G012510.2 SOLYC11G012980.1 SOLYC12G009240.1 SOLYC12G049560.2
1.33944e-06	7	89	Response to heat	SOLYC06G076020.3 SOLYC08G080540.3 SOLYC09G005120.3 SOLYC09G075950.1 SOLYC10G086410.3 SOLYC11G066100.2 SOLYC11G071830.2
1.34113e-06	4	10	Misfolded protein binding	SOLYC06G076020.3 SOLYC09G075950.1 SOLYC10G086410.3 SOLYC11G066100.2
2.19616e-06	10	284	Cellular response to organic substance	SOLYC03G093610.1 SOLYC03G096630.1 SOLYC05G009170.2 SOLYC05G052520.3 SOLYC06G076020.3 SOLYC09G008070.3 SOLYC09G075440.3 SOLYC09G075950.1 SOLYC10G086410.3 SOLYC11G066100.2
2.22108e-06	18	1142	Response to stress	SOLYC02G064980.1 SOLYC02G090970.1 SOLYC02G090990.1 SOLYC03G093610.1 SOLYC03G112310.1 SOLYC03G113100.3 SOLYC03G117640.1 SOLYC04G072900.1 SOLYC06G065820.3 SOLYC06G076020.3 SOLYC07G008620.1 SOLYC08G080540.3 SOLYC09G005120.3 SOLYC09G008070.3 SOLYC09G075950.1 SOLYC10G086410.3 SOLYC11G066100.2 SOLYC11G071830.2
2.2306e-06	5	30	de novo protein folding	SOLYC02G077670.3 SOLYC06G076020.3 SOLYC09G075950.1 SOLYC10G086410.3 SOLYC11G066100.2
2.35872e-06	4	12	Protein folding chaperone	SOLYC06G076020.3 SOLYC09G075950.1 SOLYC10G086410.3 SOLYC11G066100.2
3.32246e-06	8	164	Protein folding	SOLYC02G077670.3 SOLYC06G076020.3 SOLYC09G075950.1 SOLYC09G092690.3 SOLYC10G084170.1 SOLYC10G086410.3 SOLYC11G066100.2 SOLYC11G071830.2
5.43511e-06	4	15	Cellular response to unfolded protein	SOLYC06G076020.3 SOLYC09G075950.1 SOLYC10G086410.3 SOLYC11G066100.2
5.43511e-06	4	15	Response to unfolded protein	SOLYC06G076020.3 SOLYC09G075950.1 SOLYC10G086410.3 SOLYC11G066100.2
7.095e-06	18	1265	Molecular function regulator	SOLYC03G093610.1 SOLYC03G096630.1 SOLYC03G116890.3 SOLYC03G119390.3 SOLYC04G072900.1 SOLYC05G009170.2 SOLYC06G065820.3 SOLYC08G080540.3 SOLYC09G011030.3 SOLYC09G011170.3 SOLYC09G015770.3 SOLYC10G006130.1 SOLYC10G050970.1 SOLYC10G078930.2 SOLYC11G012510.2 SOLYC11G012980.1 SOLYC12G009240.1 SOLYC12G049560.2
9.21183e-06	5	42	Cellular response to heat	SOLYC06G076020.3 SOLYC08G080540.3 SOLYC09G075950.1 SOLYC10G086410.3 SOLYC11G066100.2
1.02305e-05	28	2958	Regulation of biological process	SOLYC02G064980.1 SOLYC02G069260.3 SOLYC02G090970.1 SOLYC02G090990.1 SOLYC03G093610.1 SOLYC03G096630.1 SOLYC03G112310.1 SOLYC03G116890.3 SOLYC03G117640.1 SOLYC03G119390.3 SOLYC03G121400.1 SOLYC04G072900.1 SOLYC05G009170.2 SOLYC05G052520.3 SOLYC06G065820.3 SOLYC06G074030.1 SOLYC07G053610.3 SOLYC08G080540.3 SOLYC09G011170.3 SOLYC09G015770.3 SOLYC09G075440.3 SOLYC10G006130.1 SOLYC10G008260.2 SOLYC10G…
1.05173e-05	11	452	Cellular response to stress	SOLYC02G064980.1 SOLYC02G090970.1 SOLYC02G090990.1 SOLYC03G113100.3 SOLYC03G117640.1 SOLYC06G076020.3 SOLYC08G080540.3 SOLYC09G008070.3 SOLYC09G075950.1 SOLYC10G086410.3 SOLYC11G066100.2
1.05173e-05	14	784	Response to chemical	SOLYC01G110800.3 SOLYC01G110920.3 SOLYC01G110930.1 SOLYC03G093610.1 SOLYC03G096630.1 SOLYC03G123550.1 SOLYC05G009170.2 SOLYC05G052520.3 SOLYC06G076020.3 SOLYC09G008070.3 SOLYC09G075440.3 SOLYC09G075950.1 SOLYC10G086410.3 SOLYC11G066100.2
1.12971e-05	17	1184	Cellular response to stimulus	SOLYC02G064980.1 SOLYC02G090970.1 SOLYC02G090990.1 SOLYC03G093610.1 SOLYC03G096630.1 SOLYC03G112310.1 SOLYC03G113100.3 SOLYC03G117640.1 SOLYC05G009170.2 SOLYC05G052520.3 SOLYC06G076020.3 SOLYC08G080540.3 SOLYC09G008070.3 SOLYC09G075440.3 SOLYC09G075950.1 SOLYC10G086410.3 SOLYC11G066100.2
1.17575e-05	21	1791	Regulation of nitrogen compound metabolic process	SOLYC02G064980.1 SOLYC02G090970.1 SOLYC02G090990.1 SOLYC03G093610.1 SOLYC03G116890.3 SOLYC03G117640.1 SOLYC03G119390.3 SOLYC03G121400.1 SOLYC04G072900.1 SOLYC06G065820.3 SOLYC06G074030.1 SOLYC07G053610.3 SOLYC08G080540.3 SOLYC09G011170.3 SOLYC09G015770.3 SOLYC10G006130.1 SOLYC10G008260.2 SOLYC10G050970.1 SOLYC11G012980.1 SOLYC12G009240.1 SOLYC12G049560.2
1.23896e-05	22	1963	Regulation of macromolecule metabolic process	SOLYC02G064980.1 SOLYC02G069260.3 SOLYC02G090970.1 SOLYC02G090990.1 SOLYC03G093610.1 SOLYC03G116890.3 SOLYC03G117640.1 SOLYC03G119390.3 SOLYC03G121400.1 SOLYC04G072900.1 SOLYC06G065820.3 SOLYC06G074030.1 SOLYC07G053610.3 SOLYC08G080540.3 SOLYC09G011170.3 SOLYC09G015770.3 SOLYC10G006130.1 SOLYC10G008260.2 SOLYC10G050970.1 SOLYC11G012980.1 SOLYC12G009240.1 SOLYC12G049560.2
1.30746e-05	21	1811	Regulation of primary metabolic process	SOLYC02G064980.1 SOLYC02G090970.1 SOLYC02G090990.1 SOLYC03G093610.1 SOLYC03G116890.3 SOLYC03G117640.1 SOLYC03G119390.3 SOLYC03G121400.1 SOLYC04G072900.1 SOLYC06G065820.3 SOLYC06G074030.1 SOLYC07G053610.3 SOLYC08G080540.3 SOLYC09G011170.3 SOLYC09G015770.3 SOLYC10G006130.1 SOLYC10G008260.2 SOLYC10G050970.1 SOLYC11G012980.1 SOLYC12G009240.1 SOLYC12G049560.2
1.35346e-05	29	3229	Biological regulation	SOLYC02G064980.1 SOLYC02G069260.3 SOLYC02G090970.1 SOLYC02G090990.1 SOLYC03G093610.1 SOLYC03G096630.1 SOLYC03G112310.1 SOLYC03G116890.3 SOLYC03G117640.1 SOLYC03G119390.3 SOLYC03G121400.1 SOLYC04G006940.3 SOLYC04G072900.1 SOLYC05G009170.2 SOLYC05G052520.3 SOLYC06G065820.3 SOLYC06G074030.1 SOLYC07G053610.3 SOLYC08G080540.3 SOLYC09G011170.3 SOLYC09G015770.3 SOLYC09G075440.3 SOLYC10G006130.1 SOLYC10G…
1.36348e-05	10	379	Cellular response to chemical stimulus	SOLYC03G093610.1 SOLYC03G096630.1 SOLYC05G009170.2 SOLYC05G052520.3 SOLYC06G076020.3 SOLYC09G008070.3 SOLYC09G075440.3 SOLYC09G075950.1 SOLYC10G086410.3 SOLYC11G066100.2
1.50666e-05	26	2702	Regulation of cellular process	SOLYC02G064980.1 SOLYC02G090970.1 SOLYC02G090990.1 SOLYC03G093610.1 SOLYC03G096630.1 SOLYC03G112310.1 SOLYC03G116890.3 SOLYC03G117640.1 SOLYC03G119390.3 SOLYC03G121400.1 SOLYC04G072900.1 SOLYC05G009170.2 SOLYC05G052520.3 SOLYC06G065820.3 SOLYC06G074030.1 SOLYC07G053610.3 SOLYC08G080540.3 SOLYC09G011170.3 SOLYC09G015770.3 SOLYC09G075440.3 SOLYC10G006130.1 SOLYC10G008260.2 SOLYC10G050970.1 SOLYC11G…
1.50666e-05	7	149	Response to temperature stimulus	SOLYC06G076020.3 SOLYC08G080540.3 SOLYC09G005120.3 SOLYC09G075950.1 SOLYC10G086410.3 SOLYC11G066100.2 SOLYC11G071830.2
1.53189e-05	22	2012	DNA binding	SOLYC03G093610.1 SOLYC03G096630.1 SOLYC03G116890.3 SOLYC03G119390.3 SOLYC03G121400.1 SOLYC04G072900.1 SOLYC04G076970.3 SOLYC04G078420.1 SOLYC04G079360.1 SOLYC05G009170.2 SOLYC06G065820.3 SOLYC07G053610.3 SOLYC08G080540.3 SOLYC09G015770.3 SOLYC09G091960.3 SOLYC10G006130.1 SOLYC10G008260.2 SOLYC10G050970.1 SOLYC11G012510.2 SOLYC11G012980.1 SOLYC12G009240.1 SOLYC12G049560.2
1.59853e-05	4	22	Protein refolding	SOLYC06G076020.3 SOLYC09G075950.1 SOLYC10G086410.3 SOLYC11G066100.2
1.66172e-05	22	2032	Regulation of metabolic process	SOLYC02G064980.1 SOLYC02G069260.3 SOLYC02G090970.1 SOLYC02G090990.1 SOLYC03G093610.1 SOLYC03G116890.3 SOLYC03G117640.1 SOLYC03G119390.3 SOLYC03G121400.1 SOLYC04G072900.1 SOLYC06G065820.3 SOLYC06G074030.1 SOLYC07G053610.3 SOLYC08G080540.3 SOLYC09G011170.3 SOLYC09G015770.3 SOLYC10G006130.1 SOLYC10G008260.2 SOLYC10G050970.1 SOLYC11G012980.1 SOLYC12G009240.1 SOLYC12G049560.2
1.66172e-05	21	1867	Regulation of cellular metabolic process	SOLYC02G064980.1 SOLYC02G090970.1 SOLYC02G090990.1 SOLYC03G093610.1 SOLYC03G116890.3 SOLYC03G117640.1 SOLYC03G119390.3 SOLYC03G121400.1 SOLYC04G072900.1 SOLYC06G065820.3 SOLYC06G074030.1 SOLYC07G053610.3 SOLYC08G080540.3 SOLYC09G011170.3 SOLYC09G015770.3 SOLYC10G006130.1 SOLYC10G008260.2 SOLYC10G050970.1 SOLYC11G012980.1 SOLYC12G009240.1 SOLYC12G049560.2
2.78594e-05	25	2634	Nucleus	SOLYC03G043700.3 SOLYC03G093610.1 SOLYC03G096630.1 SOLYC03G114160.1 SOLYC03G116890.3 SOLYC03G121400.1 SOLYC04G072900.1 SOLYC05G009170.2 SOLYC05G052520.3 SOLYC06G065820.3 SOLYC07G053610.3 SOLYC08G076930.1 SOLYC08G080540.3 SOLYC09G008070.3 SOLYC09G011170.3 SOLYC09G015770.3 SOLYC09G056450.3 SOLYC09G091960.3 SOLYC10G006130.1 SOLYC10G050970.1 SOLYC11G012510.2 SOLYC11G012980.1 SOLYC12G009240.1 SOLYC12G…
2.78594e-05	6	106	Protein processing in endoplasmic reticulum	SOLYC06G076020.3 SOLYC09G008070.3 SOLYC09G011030.3 SOLYC10G086410.3 SOLYC11G066100.2 SOLYC11G071830.2
3.50168e-05	6	111	Unfolded protein binding	SOLYC02G077670.3 SOLYC06G076020.3 SOLYC09G075950.1 SOLYC10G086410.3 SOLYC11G066100.2 SOLYC11G071830.2
0.000109066	5	78	Signal transduction by protein phosphorylation	SOLYC02G064980.1 SOLYC02G090970.1 SOLYC02G090990.1 SOLYC03G117640.1 SOLYC09G075440.3
0.000122455	6	139	Plant hormone signal transduction	SOLYC01G110800.3 SOLYC01G110920.3 SOLYC03G096630.1 SOLYC03G123550.1 SOLYC08G076930.1 SOLYC09G075440.3
0.000229671	18	1708	Regulation of gene expression	SOLYC02G069260.3 SOLYC03G093610.1 SOLYC03G116890.3 SOLYC03G119390.3 SOLYC03G121400.1 SOLYC04G072900.1 SOLYC06G065820.3 SOLYC06G074030.1 SOLYC07G053610.3 SOLYC08G080540.3 SOLYC09G011170.3 SOLYC09G015770.3 SOLYC10G006130.1 SOLYC10G008260.2 SOLYC10G050970.1 SOLYC11G012980.1 SOLYC12G009240.1 SOLYC12G049560.2
0.000266824	17	1563	Regulation of cellular macromolecule biosynthetic process	SOLYC03G093610.1 SOLYC03G116890.3 SOLYC03G119390.3 SOLYC03G121400.1 SOLYC04G072900.1 SOLYC06G065820.3 SOLYC06G074030.1 SOLYC07G053610.3 SOLYC08G080540.3 SOLYC09G011170.3 SOLYC09G015770.3 SOLYC10G006130.1 SOLYC10G008260.2 SOLYC10G050970.1 SOLYC11G012980.1 SOLYC12G009240.1 SOLYC12G049560.2
0.000271607	17	1568	Regulation of macromolecule biosynthetic process	SOLYC03G093610.1 SOLYC03G116890.3 SOLYC03G119390.3 SOLYC03G121400.1 SOLYC04G072900.1 SOLYC06G065820.3 SOLYC06G074030.1 SOLYC07G053610.3 SOLYC08G080540.3 SOLYC09G011170.3 SOLYC09G015770.3 SOLYC10G006130.1 SOLYC10G008260.2 SOLYC10G050970.1 SOLYC11G012980.1 SOLYC12G009240.1 SOLYC12G049560.2
0.000276129	4	47	Stress-activated protein kinase signaling cascade	SOLYC02G064980.1 SOLYC02G090970.1 SOLYC02G090990.1 SOLYC03G117640.1
0.000302832	17	1587	Regulation of cellular biosynthetic process	SOLYC03G093610.1 SOLYC03G116890.3 SOLYC03G119390.3 SOLYC03G121400.1 SOLYC04G072900.1 SOLYC06G065820.3 SOLYC06G074030.1 SOLYC07G053610.3 SOLYC08G080540.3 SOLYC09G011170.3 SOLYC09G015770.3 SOLYC10G006130.1 SOLYC10G008260.2 SOLYC10G050970.1 SOLYC11G012980.1 SOLYC12G009240.1 SOLYC12G049560.2
0.00030846	17	1592	Regulation of biosynthetic process	SOLYC03G093610.1 SOLYC03G116890.3 SOLYC03G119390.3 SOLYC03G121400.1 SOLYC04G072900.1 SOLYC06G065820.3 SOLYC06G074030.1 SOLYC07G053610.3 SOLYC08G080540.3 SOLYC09G011170.3 SOLYC09G015770.3 SOLYC10G006130.1 SOLYC10G008260.2 SOLYC10G050970.1 SOLYC11G012980.1 SOLYC12G009240.1 SOLYC12G049560.2
0.00043637	16	1475	Regulation of transcription, DNA-templated	SOLYC03G093610.1 SOLYC03G116890.3 SOLYC03G119390.3 SOLYC03G121400.1 SOLYC04G072900.1 SOLYC06G065820.3 SOLYC07G053610.3 SOLYC08G080540.3 SOLYC09G011170.3 SOLYC09G015770.3 SOLYC10G006130.1 SOLYC10G008260.2 SOLYC10G050970.1 SOLYC11G012980.1 SOLYC12G009240.1 SOLYC12G049560.2
0.00043637	16	1477	Regulation of nucleic acid-templated transcription	SOLYC03G093610.1 SOLYC03G116890.3 SOLYC03G119390.3 SOLYC03G121400.1 SOLYC04G072900.1 SOLYC06G065820.3 SOLYC07G053610.3 SOLYC08G080540.3 SOLYC09G011170.3 SOLYC09G015770.3 SOLYC10G006130.1 SOLYC10G008260.2 SOLYC10G050970.1 SOLYC11G012980.1 SOLYC12G009240.1 SOLYC12G049560.2
0.00043637	16	1477	Regulation of RNA biosynthetic process	SOLYC03G093610.1 SOLYC03G116890.3 SOLYC03G119390.3 SOLYC03G121400.1 SOLYC04G072900.1 SOLYC06G065820.3 SOLYC07G053610.3 SOLYC08G080540.3 SOLYC09G011170.3 SOLYC09G015770.3 SOLYC10G006130.1 SOLYC10G008260.2 SOLYC10G050970.1 SOLYC11G012980.1 SOLYC12G009240.1 SOLYC12G049560.2
0.000484898	9	484	Response to hormone	SOLYC01G110800.3 SOLYC01G110920.3 SOLYC01G110930.1 SOLYC03G093610.1 SOLYC03G096630.1 SOLYC03G123550.1 SOLYC05G009170.2 SOLYC05G052520.3 SOLYC09G075440.3
0.000505053	16	1508	Regulation of RNA metabolic process	SOLYC03G093610.1 SOLYC03G116890.3 SOLYC03G119390.3 SOLYC03G121400.1 SOLYC04G072900.1 SOLYC06G065820.3 SOLYC07G053610.3 SOLYC08G080540.3 SOLYC09G011170.3 SOLYC09G015770.3 SOLYC10G006130.1 SOLYC10G008260.2 SOLYC10G050970.1 SOLYC11G012980.1 SOLYC12G009240.1 SOLYC12G049560.2
0.000505053	17	1677	Transcription, DNA-templated	SOLYC03G093610.1 SOLYC03G116890.3 SOLYC03G119390.3 SOLYC03G121400.1 SOLYC04G072900.1 SOLYC04G076970.3 SOLYC06G065820.3 SOLYC07G053610.3 SOLYC08G080540.3 SOLYC09G011170.3 SOLYC09G015770.3 SOLYC10G006130.1 SOLYC10G008260.2 SOLYC10G050970.1 SOLYC11G012980.1 SOLYC12G009240.1 SOLYC12G049560.2
0.000505053	17	1679	Nucleic acid-templated transcription	SOLYC03G093610.1 SOLYC03G116890.3 SOLYC03G119390.3 SOLYC03G121400.1 SOLYC04G072900.1 SOLYC04G076970.3 SOLYC06G065820.3 SOLYC07G053610.3 SOLYC08G080540.3 SOLYC09G011170.3 SOLYC09G015770.3 SOLYC10G006130.1 SOLYC10G008260.2 SOLYC10G050970.1 SOLYC11G012980.1 SOLYC12G009240.1 SOLYC12G049560.2
0.000505053	30	4228	Protein binding	SOLYC01G109120.3 SOLYC02G069260.3 SOLYC02G077670.3 SOLYC03G043700.3 SOLYC03G083350.3 SOLYC03G114160.1 SOLYC03G119390.3 SOLYC03G120090.1 SOLYC04G014600.3 SOLYC04G063380.3 SOLYC06G071750.3 SOLYC06G076020.3 SOLYC07G008620.1 SOLYC08G076930.1 SOLYC09G005480.3 SOLYC09G008070.3 SOLYC09G011170.3 SOLYC09G056450.3 SOLYC09G061760.1 SOLYC09G072980.2 SOLYC09G075440.3 SOLYC09G075950.1 SOLYC09G092690.3 SOLYC10G…
0.000505053	9	492	Response to endogenous stimulus	SOLYC01G110800.3 SOLYC01G110920.3 SOLYC01G110930.1 SOLYC03G093610.1 SOLYC03G096630.1 SOLYC03G123550.1 SOLYC05G009170.2 SOLYC05G052520.3 SOLYC09G075440.3
0.000511085	17	1683	RNA biosynthetic process	SOLYC03G093610.1 SOLYC03G116890.3 SOLYC03G119390.3 SOLYC03G121400.1 SOLYC04G072900.1 SOLYC04G076970.3 SOLYC06G065820.3 SOLYC07G053610.3 SOLYC08G080540.3 SOLYC09G011170.3 SOLYC09G015770.3 SOLYC10G006130.1 SOLYC10G008260.2 SOLYC10G050970.1 SOLYC11G012980.1 SOLYC12G009240.1 SOLYC12G049560.2
0.000530046	4	59	Activation of protein kinase activity	SOLYC02G064980.1 SOLYC02G090970.1 SOLYC02G090990.1 SOLYC03G117640.1
0.000536102	19	2049	Aromatic compound biosynthetic process	SOLYC02G093250.3 SOLYC03G093610.1 SOLYC03G116890.3 SOLYC03G119390.3 SOLYC03G120090.1 SOLYC03G121400.1 SOLYC04G072900.1 SOLYC04G076970.3 SOLYC06G065820.3 SOLYC07G053610.3 SOLYC08G080540.3 SOLYC09G011170.3 SOLYC09G015770.3 SOLYC10G006130.1 SOLYC10G008260.2 SOLYC10G050970.1 SOLYC11G012980.1 SOLYC12G009240.1 SOLYC12G049560.2
0.000566382	16	1533	Regulation of nucleobase-containing compound metabolic process	SOLYC03G093610.1 SOLYC03G116890.3 SOLYC03G119390.3 SOLYC03G121400.1 SOLYC04G072900.1 SOLYC06G065820.3 SOLYC07G053610.3 SOLYC08G080540.3 SOLYC09G011170.3 SOLYC09G015770.3 SOLYC10G006130.1 SOLYC10G008260.2 SOLYC10G050970.1 SOLYC11G012980.1 SOLYC12G009240.1 SOLYC12G049560.2
0.000576619	3	22	Ethylene-activated signaling pathway	SOLYC03G093610.1 SOLYC03G096630.1 SOLYC09G075440.3
0.000666317	10	644	Sequence-specific DNA binding	SOLYC03G116890.3 SOLYC03G119390.3 SOLYC04G072900.1 SOLYC04G076970.3 SOLYC05G009170.2 SOLYC08G080540.3 SOLYC09G015770.3 SOLYC10G006130.1 SOLYC10G008260.2 SOLYC11G012510.2
0.000714803	4	65	Positive regulation of protein kinase activity	SOLYC02G064980.1 SOLYC02G090970.1 SOLYC02G090990.1 SOLYC03G117640.1
0.000718807	3	24	Cellular response to ethylene stimulus	SOLYC03G093610.1 SOLYC03G096630.1 SOLYC09G075440.3
0.000735614	4	66	Positive regulation of kinase activity	SOLYC02G064980.1 SOLYC02G090970.1 SOLYC02G090990.1 SOLYC03G117640.1
0.00081305	4	69	Positive regulation of phosphorus metabolic process	SOLYC02G064980.1 SOLYC02G090970.1 SOLYC02G090990.1 SOLYC03G117640.1
0.00081305	4	68	Positive regulation of protein phosphorylation	SOLYC02G064980.1 SOLYC02G090970.1 SOLYC02G090990.1 SOLYC03G117640.1
0.00081305	4	69	Positive regulation of phosphorylation	SOLYC02G064980.1 SOLYC02G090970.1 SOLYC02G090990.1 SOLYC03G117640.1
0.00081305	4	69	Positive regulation of phosphate metabolic process	SOLYC02G064980.1 SOLYC02G090970.1 SOLYC02G090990.1 SOLYC03G117640.1
0.00081305	19	2138	Organic cyclic compound biosynthetic process	SOLYC02G093250.3 SOLYC03G093610.1 SOLYC03G116890.3 SOLYC03G119390.3 SOLYC03G120090.1 SOLYC03G121400.1 SOLYC04G072900.1 SOLYC04G076970.3 SOLYC06G065820.3 SOLYC07G053610.3 SOLYC08G080540.3 SOLYC09G011170.3 SOLYC09G015770.3 SOLYC10G006130.1 SOLYC10G008260.2 SOLYC10G050970.1 SOLYC11G012980.1 SOLYC12G009240.1 SOLYC12G049560.2
0.000837836	11	812	Cell communication	SOLYC02G064980.1 SOLYC02G090970.1 SOLYC02G090990.1 SOLYC03G093610.1 SOLYC03G096630.1 SOLYC03G112310.1 SOLYC03G117640.1 SOLYC05G009170.2 SOLYC05G052520.3 SOLYC07G063770.3 SOLYC09G075440.3
0.00109437	4	75	Positive regulation of transferase activity	SOLYC02G064980.1 SOLYC02G090970.1 SOLYC02G090990.1 SOLYC03G117640.1
0.00119066	18	2028	Heterocycle biosynthetic process	SOLYC03G093610.1 SOLYC03G116890.3 SOLYC03G119390.3 SOLYC03G120090.1 SOLYC03G121400.1 SOLYC04G072900.1 SOLYC04G076970.3 SOLYC06G065820.3 SOLYC07G053610.3 SOLYC08G080540.3 SOLYC09G011170.3 SOLYC09G015770.3 SOLYC10G006130.1 SOLYC10G008260.2 SOLYC10G050970.1 SOLYC11G012980.1 SOLYC12G009240.1 SOLYC12G049560.2
0.00119066	7	333	Intracellular signal transduction	SOLYC02G064980.1 SOLYC02G090970.1 SOLYC02G090990.1 SOLYC03G093610.1 SOLYC03G096630.1 SOLYC03G117640.1 SOLYC09G075440.3
0.00119066	28	4064	Cytoplasm	SOLYC02G064980.1 SOLYC02G077670.3 SOLYC02G090970.1 SOLYC02G090990.1 SOLYC03G043700.3 SOLYC03G097410.1 SOLYC03G112310.1 SOLYC03G113100.3 SOLYC03G114160.1 SOLYC03G117640.1 SOLYC03G120090.1 SOLYC04G006940.3 SOLYC04G014600.3 SOLYC06G074030.1 SOLYC06G076020.3 SOLYC07G064600.3 SOLYC09G005120.3 SOLYC09G008070.3 SOLYC09G011030.3 SOLYC09G056450.3 SOLYC09G061760.1 SOLYC09G075440.3 SOLYC09G075950.1 SOLYC09G…
0.00130831	10	717	Signal transduction	SOLYC02G064980.1 SOLYC02G090970.1 SOLYC02G090990.1 SOLYC03G093610.1 SOLYC03G096630.1 SOLYC03G112310.1 SOLYC03G117640.1 SOLYC05G009170.2 SOLYC05G052520.3 SOLYC09G075440.3
0.0013506	10	721	Signaling	SOLYC02G064980.1 SOLYC02G090970.1 SOLYC02G090990.1 SOLYC03G093610.1 SOLYC03G096630.1 SOLYC03G112310.1 SOLYC03G117640.1 SOLYC05G009170.2 SOLYC05G052520.3 SOLYC09G075440.3
0.0015158	17	1889	Nucleobase-containing compound biosynthetic process	SOLYC03G093610.1 SOLYC03G116890.3 SOLYC03G119390.3 SOLYC03G121400.1 SOLYC04G072900.1 SOLYC04G076970.3 SOLYC06G065820.3 SOLYC07G053610.3 SOLYC08G080540.3 SOLYC09G011170.3 SOLYC09G015770.3 SOLYC10G006130.1 SOLYC10G008260.2 SOLYC10G050970.1 SOLYC11G012980.1 SOLYC12G009240.1 SOLYC12G049560.2
0.00161945	4	85	Positive regulation of protein modification process	SOLYC02G064980.1 SOLYC02G090970.1 SOLYC02G090990.1 SOLYC03G117640.1
0.0023165	3	38	Chaperone binding	SOLYC02G077670.3 SOLYC10G078930.2 SOLYC10G084170.1
0.00232454	4	94	MAPK signaling pathway	SOLYC02G088090.1 SOLYC03G096630.1 SOLYC08G076930.1 SOLYC09G075440.3
0.00281266	24	3424	Nucleic acid binding	SOLYC02G069260.3 SOLYC03G093610.1 SOLYC03G096630.1 SOLYC03G116890.3 SOLYC03G119390.3 SOLYC03G121400.1 SOLYC04G072900.1 SOLYC04G076970.3 SOLYC04G078420.1 SOLYC04G079360.1 SOLYC05G009170.2 SOLYC06G065820.3 SOLYC06G074030.1 SOLYC07G053610.3 SOLYC08G080540.3 SOLYC09G015770.3 SOLYC09G091960.3 SOLYC10G006130.1 SOLYC10G008260.2 SOLYC10G050970.1 SOLYC11G012510.2 SOLYC11G012980.1 SOLYC12G009240.1 SOLYC12G…
0.00281266	3	41	Response to ethylene	SOLYC03G093610.1 SOLYC03G096630.1 SOLYC09G075440.3
0.00291311	18	2205	ATP binding	SOLYC02G064980.1 SOLYC02G090970.1 SOLYC02G090990.1 SOLYC03G097410.1 SOLYC03G112310.1 SOLYC03G113100.3 SOLYC03G115230.3 SOLYC03G117640.1 SOLYC04G006940.3 SOLYC06G076020.3 SOLYC07G063770.3 SOLYC09G008070.3 SOLYC09G075950.1 SOLYC10G086410.3 SOLYC11G020230.1 SOLYC11G066100.2 SOLYC11G071830.2 SOLYC12G005450.1
0.00291311	4	101	Endocytosis	SOLYC06G076020.3 SOLYC10G085590.1 SOLYC10G086410.3 SOLYC11G066100.2
0.00358373	4	107	Regulation of protein kinase activity	SOLYC02G064980.1 SOLYC02G090970.1 SOLYC02G090990.1 SOLYC03G117640.1
0.00366939	4	108	Regulation of kinase activity	SOLYC02G064980.1 SOLYC02G090970.1 SOLYC02G090990.1 SOLYC03G117640.1
0.00384436	4	110	Positive regulation of catalytic activity	SOLYC02G064980.1 SOLYC02G090970.1 SOLYC02G090990.1 SOLYC03G117640.1
0.00384436	19	2465	Adenyl nucleotide binding	SOLYC02G064980.1 SOLYC02G090970.1 SOLYC02G090990.1 SOLYC03G097410.1 SOLYC03G112310.1 SOLYC03G113100.3 SOLYC03G115230.3 SOLYC03G117640.1 SOLYC04G006940.3 SOLYC06G076020.3 SOLYC07G063770.3 SOLYC09G008070.3 SOLYC09G011030.3 SOLYC09G075950.1 SOLYC10G086410.3 SOLYC11G020230.1 SOLYC11G066100.2 SOLYC11G071830.2 SOLYC12G005450.1
0.00434935	4	114	Positive regulation of molecular function	SOLYC02G064980.1 SOLYC02G090970.1 SOLYC02G090990.1 SOLYC03G117640.1
0.00474259	4	117	Positive regulation of cellular protein metabolic process	SOLYC02G064980.1 SOLYC02G090970.1 SOLYC02G090990.1 SOLYC03G117640.1
0.00484323	4	118	Regulation of transferase activity	SOLYC02G064980.1 SOLYC02G090970.1 SOLYC02G090990.1 SOLYC03G117640.1
0.00526358	4	121	Positive regulation of protein metabolic process	SOLYC02G064980.1 SOLYC02G090970.1 SOLYC02G090990.1 SOLYC03G117640.1
0.00590428	2	13	ATPase regulator activity	SOLYC09G011030.3 SOLYC10G078930.2
0.00592518	7	454	Response to abiotic stimulus	SOLYC06G076020.3 SOLYC08G080540.3 SOLYC09G005120.3 SOLYC09G075950.1 SOLYC10G086410.3 SOLYC11G066100.2 SOLYC11G071830.2
0.00593137	4	126	Regulation of protein phosphorylation	SOLYC02G064980.1 SOLYC02G090970.1 SOLYC02G090990.1 SOLYC03G117640.1
0.00604565	4	127	Regulation of phosphorylation	SOLYC02G064980.1 SOLYC02G090970.1 SOLYC02G090990.1 SOLYC03G117640.1
0.00619857	7	460	Protein serine/threonine kinase activity	SOLYC02G064980.1 SOLYC02G090970.1 SOLYC02G090990.1 SOLYC03G112310.1 SOLYC03G117640.1 SOLYC07G063770.3 SOLYC12G005450.1
0.00730883	5	231	Hormone-mediated signaling pathway	SOLYC03G093610.1 SOLYC03G096630.1 SOLYC05G009170.2 SOLYC05G052520.3 SOLYC09G075440.3
0.00830404	19	2656	Cellular nitrogen compound biosynthetic process	SOLYC03G093610.1 SOLYC03G116890.3 SOLYC03G119390.3 SOLYC03G120090.1 SOLYC03G121400.1 SOLYC04G072900.1 SOLYC04G076970.3 SOLYC06G065820.3 SOLYC06G074030.1 SOLYC07G053610.3 SOLYC08G080540.3 SOLYC09G011170.3 SOLYC09G015770.3 SOLYC10G006130.1 SOLYC10G008260.2 SOLYC10G050970.1 SOLYC11G012980.1 SOLYC12G009240.1 SOLYC12G049560.2
0.00830404	18	2450	Purine ribonucleoside triphosphate binding	SOLYC02G064980.1 SOLYC02G090970.1 SOLYC02G090990.1 SOLYC03G097410.1 SOLYC03G112310.1 SOLYC03G113100.3 SOLYC03G115230.3 SOLYC03G117640.1 SOLYC04G006940.3 SOLYC06G076020.3 SOLYC07G063770.3 SOLYC09G008070.3 SOLYC09G075950.1 SOLYC10G086410.3 SOLYC11G020230.1 SOLYC11G066100.2 SOLYC11G071830.2 SOLYC12G005450.1
0.00852931	18	2458	Adenyl ribonucleotide binding	SOLYC02G064980.1 SOLYC02G090970.1 SOLYC02G090990.1 SOLYC03G097410.1 SOLYC03G112310.1 SOLYC03G113100.3 SOLYC03G115230.3 SOLYC03G117640.1 SOLYC04G006940.3 SOLYC06G076020.3 SOLYC07G063770.3 SOLYC09G008070.3 SOLYC09G075950.1 SOLYC10G086410.3 SOLYC11G020230.1 SOLYC11G066100.2 SOLYC11G071830.2 SOLYC12G005450.1
0.00862898	5	242	Cellular response to hormone stimulus	SOLYC03G093610.1 SOLYC03G096630.1 SOLYC05G009170.2 SOLYC05G052520.3 SOLYC09G075440.3
0.00985898	5	250	Cellular response to endogenous stimulus	SOLYC03G093610.1 SOLYC03G096630.1 SOLYC05G009170.2 SOLYC05G052520.3 SOLYC09G075440.3
0.0102109	19	2715	Purine nucleotide binding	SOLYC02G064980.1 SOLYC02G090970.1 SOLYC02G090990.1 SOLYC03G097410.1 SOLYC03G112310.1 SOLYC03G113100.3 SOLYC03G115230.3 SOLYC03G117640.1 SOLYC04G006940.3 SOLYC06G076020.3 SOLYC07G063770.3 SOLYC09G008070.3 SOLYC09G011030.3 SOLYC09G075950.1 SOLYC10G086410.3 SOLYC11G020230.1 SOLYC11G066100.2 SOLYC11G071830.2 SOLYC12G005450.1
0.0106888	18	2517	RNA metabolic process	SOLYC03G093610.1 SOLYC03G116890.3 SOLYC03G119390.3 SOLYC03G121400.1 SOLYC04G072900.1 SOLYC04G076970.3 SOLYC06G065820.3 SOLYC06G074030.1 SOLYC07G053610.3 SOLYC08G080540.3 SOLYC09G011170.3 SOLYC09G015770.3 SOLYC10G006130.1 SOLYC10G008260.2 SOLYC10G050970.1 SOLYC11G012980.1 SOLYC12G009240.1 SOLYC12G049560.2
0.0113658	19	2745	Ribonucleotide binding	SOLYC02G064980.1 SOLYC02G090970.1 SOLYC02G090990.1 SOLYC03G097410.1 SOLYC03G112310.1 SOLYC03G113100.3 SOLYC03G115230.3 SOLYC03G117640.1 SOLYC04G006940.3 SOLYC06G076020.3 SOLYC07G063770.3 SOLYC09G008070.3 SOLYC09G075950.1 SOLYC10G086410.3 SOLYC11G020230.1 SOLYC11G066100.2 SOLYC11G071830.2 SOLYC12G005450.1 SOLYC12G098850.2
0.0125988	5	267	Regulation of cellular protein metabolic process	SOLYC02G064980.1 SOLYC02G090970.1 SOLYC02G090990.1 SOLYC03G117640.1 SOLYC06G074030.1
0.0125988	16	2148	Protein modification process	SOLYC02G064980.1 SOLYC02G090970.1 SOLYC02G090990.1 SOLYC03G112310.1 SOLYC03G113100.3 SOLYC03G114160.1 SOLYC03G117640.1 SOLYC04G063380.3 SOLYC05G052520.3 SOLYC07G063770.3 SOLYC09G056450.3 SOLYC09G075440.3 SOLYC09G092690.3 SOLYC10G085590.1 SOLYC11G020230.1 SOLYC12G005450.1
0.0125988	16	2148	Cellular protein modification process	SOLYC02G064980.1 SOLYC02G090970.1 SOLYC02G090990.1 SOLYC03G112310.1 SOLYC03G113100.3 SOLYC03G114160.1 SOLYC03G117640.1 SOLYC04G063380.3 SOLYC05G052520.3 SOLYC07G063770.3 SOLYC09G056450.3 SOLYC09G075440.3 SOLYC09G092690.3 SOLYC10G085590.1 SOLYC11G020230.1 SOLYC12G005450.1
0.0127893	4	162	Regulation of phosphate metabolic process	SOLYC02G064980.1 SOLYC02G090970.1 SOLYC02G090990.1 SOLYC03G117640.1
0.0127893	4	162	Regulation of phosphorus metabolic process	SOLYC02G064980.1 SOLYC02G090970.1 SOLYC02G090990.1 SOLYC03G117640.1
0.0127893	19	2787	Carbohydrate derivative binding	SOLYC02G064980.1 SOLYC02G090970.1 SOLYC02G090990.1 SOLYC03G097410.1 SOLYC03G112310.1 SOLYC03G113100.3 SOLYC03G115230.3 SOLYC03G117640.1 SOLYC04G006940.3 SOLYC06G076020.3 SOLYC07G063770.3 SOLYC09G008070.3 SOLYC09G075950.1 SOLYC10G086410.3 SOLYC11G020230.1 SOLYC11G066100.2 SOLYC11G071830.2 SOLYC12G005450.1 SOLYC12G098850.2
0.0128244	3	77	Spliceosome	SOLYC06G076020.3 SOLYC10G086410.3 SOLYC11G066100.2
0.0139246	5	277	Regulation of protein metabolic process	SOLYC02G064980.1 SOLYC02G090970.1 SOLYC02G090990.1 SOLYC03G117640.1 SOLYC06G074030.1
0.0140429	20	3037	Nucleotide binding	SOLYC02G064980.1 SOLYC02G090970.1 SOLYC02G090990.1 SOLYC03G097410.1 SOLYC03G112310.1 SOLYC03G113100.3 SOLYC03G115230.3 SOLYC03G117640.1 SOLYC04G006940.3 SOLYC06G076020.3 SOLYC07G063770.3 SOLYC09G008070.3 SOLYC09G011030.3 SOLYC09G075950.1 SOLYC10G086410.3 SOLYC11G020230.1 SOLYC11G066100.2 SOLYC11G071830.2 SOLYC12G005450.1 SOLYC12G098850.2
0.0140429	20	3037	Nucleoside phosphate binding	SOLYC02G064980.1 SOLYC02G090970.1 SOLYC02G090990.1 SOLYC03G097410.1 SOLYC03G112310.1 SOLYC03G113100.3 SOLYC03G115230.3 SOLYC03G117640.1 SOLYC04G006940.3 SOLYC06G076020.3 SOLYC07G063770.3 SOLYC09G008070.3 SOLYC09G011030.3 SOLYC09G075950.1 SOLYC10G086410.3 SOLYC11G020230.1 SOLYC11G066100.2 SOLYC11G071830.2 SOLYC12G005450.1 SOLYC12G098850.2
0.0140939	19	2822	Nucleic acid metabolic process	SOLYC03G093610.1 SOLYC03G113100.3 SOLYC03G116890.3 SOLYC03G119390.3 SOLYC03G121400.1 SOLYC04G072900.1 SOLYC04G076970.3 SOLYC06G065820.3 SOLYC06G074030.1 SOLYC07G053610.3 SOLYC08G080540.3 SOLYC09G011170.3 SOLYC09G015770.3 SOLYC10G006130.1 SOLYC10G008260.2 SOLYC10G050970.1 SOLYC11G012980.1 SOLYC12G009240.1 SOLYC12G049560.2
0.0141917	3	81	Phosphorelay signal transduction system	SOLYC03G093610.1 SOLYC03G096630.1 SOLYC09G075440.3
0.0151656	21	3286	Small molecule binding	SOLYC02G064980.1 SOLYC02G090970.1 SOLYC02G090990.1 SOLYC03G097410.1 SOLYC03G112310.1 SOLYC03G113100.3 SOLYC03G115230.3 SOLYC03G117640.1 SOLYC04G006940.3 SOLYC06G076020.3 SOLYC07G063770.3 SOLYC08G068600.3 SOLYC09G008070.3 SOLYC09G011030.3 SOLYC09G075950.1 SOLYC10G086410.3 SOLYC11G020230.1 SOLYC11G066100.2 SOLYC11G071830.2 SOLYC12G005450.1 SOLYC12G098850.2
0.01665	4	178	Regulation of protein modification process	SOLYC02G064980.1 SOLYC02G090970.1 SOLYC02G090990.1 SOLYC03G117640.1
0.0201948	18	2705	Purine ribonucleotide binding	SOLYC02G064980.1 SOLYC02G090970.1 SOLYC02G090990.1 SOLYC03G097410.1 SOLYC03G112310.1 SOLYC03G113100.3 SOLYC03G115230.3 SOLYC03G117640.1 SOLYC04G006940.3 SOLYC06G076020.3 SOLYC07G063770.3 SOLYC09G008070.3 SOLYC09G075950.1 SOLYC10G086410.3 SOLYC11G020230.1 SOLYC11G066100.2 SOLYC11G071830.2 SOLYC12G005450.1
0.0204229	18	2710	Cellular macromolecule biosynthetic process	SOLYC03G093610.1 SOLYC03G116890.3 SOLYC03G119390.3 SOLYC03G121400.1 SOLYC04G072900.1 SOLYC04G076970.3 SOLYC06G065820.3 SOLYC06G074030.1 SOLYC07G053610.3 SOLYC08G080540.3 SOLYC09G011170.3 SOLYC09G015770.3 SOLYC10G006130.1 SOLYC10G008260.2 SOLYC10G050970.1 SOLYC11G012980.1 SOLYC12G009240.1 SOLYC12G049560.2
0.0220737	4	194	Response to auxin	SOLYC01G110800.3 SOLYC01G110920.3 SOLYC01G110930.1 SOLYC03G123550.1
0.0224615	18	2739	Macromolecule biosynthetic process	SOLYC03G093610.1 SOLYC03G116890.3 SOLYC03G119390.3 SOLYC03G121400.1 SOLYC04G072900.1 SOLYC04G076970.3 SOLYC06G065820.3 SOLYC06G074030.1 SOLYC07G053610.3 SOLYC08G080540.3 SOLYC09G011170.3 SOLYC09G015770.3 SOLYC10G006130.1 SOLYC10G008260.2 SOLYC10G050970.1 SOLYC11G012980.1 SOLYC12G009240.1 SOLYC12G049560.2
0.0238796	21	3430	Cellular aromatic compound metabolic process	SOLYC02G093250.3 SOLYC03G093610.1 SOLYC03G113100.3 SOLYC03G116890.3 SOLYC03G119390.3 SOLYC03G120090.1 SOLYC03G121400.1 SOLYC04G072900.1 SOLYC04G076970.3 SOLYC06G065820.3 SOLYC06G074030.1 SOLYC07G053610.3 SOLYC08G080540.3 SOLYC09G011170.3 SOLYC09G015770.3 SOLYC10G006130.1 SOLYC10G008260.2 SOLYC10G050970.1 SOLYC11G012980.1 SOLYC12G009240.1 SOLYC12G049560.2
0.0243309	19	2986	Gene expression	SOLYC02G069260.3 SOLYC03G093610.1 SOLYC03G116890.3 SOLYC03G119390.3 SOLYC03G121400.1 SOLYC04G072900.1 SOLYC04G076970.3 SOLYC06G065820.3 SOLYC06G074030.1 SOLYC07G053610.3 SOLYC08G080540.3 SOLYC09G011170.3 SOLYC09G015770.3 SOLYC10G006130.1 SOLYC10G008260.2 SOLYC10G050970.1 SOLYC11G012980.1 SOLYC12G009240.1 SOLYC12G049560.2
0.0245979	20	3216	Anion binding	SOLYC02G064980.1 SOLYC02G090970.1 SOLYC02G090990.1 SOLYC03G097410.1 SOLYC03G112310.1 SOLYC03G113100.3 SOLYC03G115230.3 SOLYC03G117640.1 SOLYC04G006940.3 SOLYC06G076020.3 SOLYC07G063770.3 SOLYC08G068600.3 SOLYC09G008070.3 SOLYC09G075950.1 SOLYC10G086410.3 SOLYC11G020230.1 SOLYC11G066100.2 SOLYC11G071830.2 SOLYC12G005450.1 SOLYC12G098850.2
0.0293707	21	3500	Organic cyclic compound metabolic process	SOLYC02G093250.3 SOLYC03G093610.1 SOLYC03G113100.3 SOLYC03G116890.3 SOLYC03G119390.3 SOLYC03G120090.1 SOLYC03G121400.1 SOLYC04G072900.1 SOLYC04G076970.3 SOLYC06G065820.3 SOLYC06G074030.1 SOLYC07G053610.3 SOLYC08G080540.3 SOLYC09G011170.3 SOLYC09G015770.3 SOLYC10G006130.1 SOLYC10G008260.2 SOLYC10G050970.1 SOLYC11G012980.1 SOLYC12G009240.1 SOLYC12G049560.2
0.0303408	11	1363	Kinase activity	SOLYC02G064980.1 SOLYC02G090970.1 SOLYC02G090990.1 SOLYC03G083350.3 SOLYC03G097410.1 SOLYC03G112310.1 SOLYC03G117640.1 SOLYC07G063770.3 SOLYC09G075440.3 SOLYC11G020230.1 SOLYC12G005450.1
0.0331562	5	351	Defense response	SOLYC03G093610.1 SOLYC03G112310.1 SOLYC04G072900.1 SOLYC06G065820.3 SOLYC07G008620.1
0.0335692	16	2422	Macromolecule modification	SOLYC02G064980.1 SOLYC02G090970.1 SOLYC02G090990.1 SOLYC03G112310.1 SOLYC03G113100.3 SOLYC03G114160.1 SOLYC03G117640.1 SOLYC04G063380.3 SOLYC05G052520.3 SOLYC07G063770.3 SOLYC09G056450.3 SOLYC09G075440.3 SOLYC09G092690.3 SOLYC10G085590.1 SOLYC11G020230.1 SOLYC12G005450.1
0.0338159	2	37	Phosphatidylinositol signaling system	SOLYC02G088090.1 SOLYC03G097410.1
0.034972	3	117	Proteasome-mediated ubiquitin-dependent protein catabolic process	SOLYC03G113100.3 SOLYC04G063380.3 SOLYC09G008070.3
0.034972	3	117	Plant-pathogen interaction	SOLYC02G088090.1 SOLYC04G058170.1 SOLYC07G008620.1
0.0369433	20	3357	Heterocycle metabolic process	SOLYC03G093610.1 SOLYC03G113100.3 SOLYC03G116890.3 SOLYC03G119390.3 SOLYC03G120090.1 SOLYC03G121400.1 SOLYC04G072900.1 SOLYC04G076970.3 SOLYC06G065820.3 SOLYC06G074030.1 SOLYC07G053610.3 SOLYC08G080540.3 SOLYC09G011170.3 SOLYC09G015770.3 SOLYC10G006130.1 SOLYC10G008260.2 SOLYC10G050970.1 SOLYC11G012980.1 SOLYC12G009240.1 SOLYC12G049560.2
0.0386459	3	122	Proteasomal protein catabolic process	SOLYC03G113100.3 SOLYC04G063380.3 SOLYC09G008070.3
0.039907	5	372	ATPase activity	SOLYC06G076020.3 SOLYC09G008070.3 SOLYC09G075950.1 SOLYC10G086410.3 SOLYC11G066100.2
0.0403745	19	3161	Nucleobase-containing compound metabolic process	SOLYC03G093610.1 SOLYC03G113100.3 SOLYC03G116890.3 SOLYC03G119390.3 SOLYC03G121400.1 SOLYC04G072900.1 SOLYC04G076970.3 SOLYC06G065820.3 SOLYC06G074030.1 SOLYC07G053610.3 SOLYC08G080540.3 SOLYC09G011170.3 SOLYC09G015770.3 SOLYC10G006130.1 SOLYC10G008260.2 SOLYC10G050970.1 SOLYC11G012980.1 SOLYC12G009240.1 SOLYC12G049560.2
0.0452261	4	247	Regulation of catalytic activity	SOLYC02G064980.1 SOLYC02G090970.1 SOLYC02G090990.1 SOLYC03G117640.1
0.0458178	5	387	Positive regulation of nitrogen compound metabolic process	SOLYC02G064980.1 SOLYC02G090970.1 SOLYC02G090990.1 SOLYC03G117640.1 SOLYC08G080540.3
0.0460262	1	3	Stomatal lineage progression	SOLYC05G052520.3
0.0460262	1	3	Positive regulation of developmental growth	SOLYC12G096570.1
0.0471735	5	393	Positive regulation of cellular metabolic process	SOLYC02G064980.1 SOLYC02G090970.1 SOLYC02G090990.1 SOLYC03G117640.1 SOLYC08G080540.3
0.0471735	6	549	Positive regulation of biological process	SOLYC02G064980.1 SOLYC02G090970.1 SOLYC02G090990.1 SOLYC03G117640.1 SOLYC08G080540.3 SOLYC12G096570.1
0.0471735	2	46	Plant epidermis development	SOLYC05G009170.2 SOLYC05G052520.3
0.0474888	5	395	Positive regulation of macromolecule metabolic process	SOLYC02G064980.1 SOLYC02G090970.1 SOLYC02G090990.1 SOLYC03G117640.1 SOLYC08G080540.3
0.0474888	20	3468	Protein metabolic process	SOLYC02G064980.1 SOLYC02G065050.1 SOLYC02G090970.1 SOLYC02G090990.1 SOLYC03G112310.1 SOLYC03G113100.3 SOLYC03G114160.1 SOLYC03G115230.3 SOLYC03G117640.1 SOLYC04G063380.3 SOLYC05G052520.3 SOLYC06G074030.1 SOLYC07G063770.3 SOLYC09G008070.3 SOLYC09G056450.3 SOLYC09G075440.3 SOLYC09G092690.3 SOLYC10G085590.1 SOLYC11G020230.1 SOLYC12G005450.1
0.0474888	4	255	Regulation of molecular function	SOLYC02G064980.1 SOLYC02G090970.1 SOLYC02G090990.1 SOLYC03G117640.1
0.0482184	18	3010	Cellular protein metabolic process	SOLYC02G064980.1 SOLYC02G090970.1 SOLYC02G090990.1 SOLYC03G112310.1 SOLYC03G113100.3 SOLYC03G114160.1 SOLYC03G117640.1 SOLYC04G063380.3 SOLYC05G052520.3 SOLYC06G074030.1 SOLYC07G063770.3 SOLYC09G008070.3 SOLYC09G056450.3 SOLYC09G075440.3 SOLYC09G092690.3 SOLYC10G085590.1 SOLYC11G020230.1 SOLYC12G005450.1
0.0497912	10	1292	Phosphotransferase activity, alcohol group as acceptor	SOLYC02G064980.1 SOLYC02G090970.1 SOLYC02G090990.1 SOLYC03G097410.1 SOLYC03G112310.1 SOLYC03G117640.1 SOLYC07G063770.3 SOLYC09G075440.3 SOLYC11G020230.1 SOLYC12G005450.1

## Sheet: Overall enrichment_downregulate
			Overall enrichment of downregulated genes
Enrichment FDR	Genes in list	Total genes	Functional Category	Genes
0.00199312	7	223	UDP-glycosyltransferase activity	SOLYC01G095620.3 SOLYC07G043480.1 SOLYC08G006410.3 SOLYC10G085870.1 SOLYC12G014010.2 SOLYC12G014430.2 SOLYC12G042600.2
0.00310751	6	196	Enzyme inhibitor activity	SOLYC03G020010.1 SOLYC03G020030.3 SOLYC06G072220.1 SOLYC06G072230.1 SOLYC08G006690.1 SOLYC11G005770.2
0.00310751	4	63	Endopeptidase inhibitor activity	SOLYC03G020010.1 SOLYC03G020030.3 SOLYC06G072220.1 SOLYC06G072230.1
0.00310751	4	63	Peptidase inhibitor activity	SOLYC03G020010.1 SOLYC03G020030.3 SOLYC06G072220.1 SOLYC06G072230.1
0.00310751	4	65	Peptidase regulator activity	SOLYC03G020010.1 SOLYC03G020030.3 SOLYC06G072220.1 SOLYC06G072230.1
0.00310751	4	64	Endopeptidase regulator activity	SOLYC03G020010.1 SOLYC03G020030.3 SOLYC06G072220.1 SOLYC06G072230.1
0.00310751	3	18	Zeatin biosynthesis	SOLYC07G043480.1 SOLYC10G085870.1 SOLYC12G042600.2
0.00426146	3	28	Drug transport	SOLYC03G118970.3 SOLYC11G010380.2 SOLYC12G005850.2
0.00426146	3	28	Response to drug	SOLYC03G118970.3 SOLYC11G010380.2 SOLYC12G005850.2
0.00426146	3	28	Drug transmembrane transport	SOLYC03G118970.3 SOLYC11G010380.2 SOLYC12G005850.2
0.00510237	7	375	Enzyme regulator activity	SOLYC03G020010.1 SOLYC03G020030.3 SOLYC04G078310.3 SOLYC06G072220.1 SOLYC06G072230.1 SOLYC08G006690.1 SOLYC11G005770.2
0.00533246	7	383	Transferase activity, transferring hexosyl groups	SOLYC01G095620.3 SOLYC07G043480.1 SOLYC08G006410.3 SOLYC10G085870.1 SOLYC12G014010.2 SOLYC12G014430.2 SOLYC12G042600.2
0.00547534	8	531	Transferase activity, transferring glycosyl groups	SOLYC01G095620.3 SOLYC01G100210.3 SOLYC07G043480.1 SOLYC08G006410.3 SOLYC10G085870.1 SOLYC12G014010.2 SOLYC12G014430.2 SOLYC12G042600.2
0.00547534	12	1194	Metabolic pathways	SOLYC01G086650.3 SOLYC02G080530.3 SOLYC02G082850.3 SOLYC02G083860.3 SOLYC05G013207.1 SOLYC06G054670.2 SOLYC07G017610.3 SOLYC07G065980.3 SOLYC08G006150.3 SOLYC09G065800.3 SOLYC10G074440.2 SOLYC11G065620.2
0.00593932	9	695	Biosynthesis of secondary metabolites	SOLYC01G086650.3 SOLYC02G080530.3 SOLYC02G082850.3 SOLYC02G083860.3 SOLYC05G013207.1 SOLYC07G017610.3 SOLYC09G065800.3 SOLYC10G085870.1 SOLYC12G042600.2
0.00684087	3	39	Quercetin 3-O-glucosyltransferase activity	SOLYC01G095620.3 SOLYC08G006410.3 SOLYC10G085870.1
0.00684087	3	39	Quercetin 7-O-glucosyltransferase activity	SOLYC01G095620.3 SOLYC08G006410.3 SOLYC10G085870.1
0.00705207	12	1265	Molecular function regulator	SOLYC01G100460.3 SOLYC02G089420.1 SOLYC03G020010.1 SOLYC03G020030.3 SOLYC04G078310.3 SOLYC06G072220.1 SOLYC06G072230.1 SOLYC08G006690.1 SOLYC09G008810.3 SOLYC10G079380.2 SOLYC11G005770.2 SOLYC11G006230.2
0.00798799	4	107	UDP-glucosyltransferase activity	SOLYC01G095620.3 SOLYC08G006410.3 SOLYC10G085870.1 SOLYC12G014430.2
0.013388	23	3979	Integral component of membrane	SOLYC01G094020.3 SOLYC03G114960.3 SOLYC03G118970.3 SOLYC03G120310.3 SOLYC04G014520.1 SOLYC04G016440.3 SOLYC04G077810.1 SOLYC05G013207.1 SOLYC06G066680.3 SOLYC06G068150.3 SOLYC07G007800.3 SOLYC07G017610.3 SOLYC08G014080.3 SOLYC08G075240.3 SOLYC09G009150.1 SOLYC09G065800.3 SOLYC10G080880.2 SOLYC10G083690.3 SOLYC11G010380.2 SOLYC12G005850.2 SOLYC12G013690.2 SOLYC12G014430.2 SOLYC12G042380.2
0.013388	8	644	Sequence-specific DNA binding	SOLYC01G100460.3 SOLYC01G111500.3 SOLYC05G007450.3 SOLYC05G007690.2 SOLYC05G007710.3 SOLYC09G008810.3 SOLYC10G055410.2 SOLYC10G079380.2
0.0157743	23	4040	Intrinsic component of membrane	SOLYC01G094020.3 SOLYC03G114960.3 SOLYC03G118970.3 SOLYC03G120310.3 SOLYC04G014520.1 SOLYC04G016440.3 SOLYC04G077810.1 SOLYC05G013207.1 SOLYC06G066680.3 SOLYC06G068150.3 SOLYC07G007800.3 SOLYC07G017610.3 SOLYC08G014080.3 SOLYC08G075240.3 SOLYC09G009150.1 SOLYC09G065800.3 SOLYC10G080880.2 SOLYC10G083690.3 SOLYC11G010380.2 SOLYC12G005850.2 SOLYC12G013690.2 SOLYC12G014430.2 SOLYC12G042380.2
0.0192878	4	142	Cell differentiation	SOLYC01G111500.3 SOLYC05G007690.2 SOLYC05G007710.3 SOLYC10G055410.2
0.0194775	4	144	Glucosyltransferase activity	SOLYC01G095620.3 SOLYC08G006410.3 SOLYC10G085870.1 SOLYC12G014430.2
0.0261921	3	70	Xenobiotic transmembrane transporter activity	SOLYC03G118970.3 SOLYC11G010380.2 SOLYC12G005850.2
0.0266119	4	160	Cellular developmental process	SOLYC01G111500.3 SOLYC05G007690.2 SOLYC05G007710.3 SOLYC10G055410.2
0.0278744	2	18	Sulfur metabolism	SOLYC02G082850.3 SOLYC11G065620.2
0.0299872	2	19	Fatty acid elongation	SOLYC05G013207.1 SOLYC09G065800.3
0.048759	5	330	Organic acid biosynthetic process	SOLYC02G082850.3 SOLYC05G013207.1 SOLYC07G017610.3 SOLYC09G065800.3 SOLYC11G065620.2
0.048759	2	25	Sulfur amino acid biosynthetic process	SOLYC02G082850.3 SOLYC11G065620.2

## Sheet: GOBP enrichment_upregulated
				GOBP terms enrichment of upregulated genes
Enrichment FDR	Genes in list	Total genes	Functional Category	Genes
3.54115e-07	6	31	Chaperone-mediated protein folding	SOLYC02G077670.3 SOLYC06G076020.3 SOLYC09G075950.1 SOLYC09G092690.3 SOLYC10G086410.3 SOLYC11G066100.2
6.66198e-07	14	564	Response to organic substance	SOLYC03G096630.1 SOLYC05G009170.2 SOLYC06G076020.3 SOLYC09G008070.3 SOLYC09G075950.1 SOLYC10G086410.3 SOLYC11G066100.2 SOLYC01G110800.3 SOLYC01G110920.3 SOLYC01G110930.1 SOLYC03G093610.1 SOLYC03G123550.1 SOLYC05G052520.3 SOLYC09G075440.3
6.66198e-07	5	22	Response to topologically incorrect protein	SOLYC06G076020.3 SOLYC09G008070.3 SOLYC09G075950.1 SOLYC10G086410.3 SOLYC11G066100.2
6.66198e-07	5	22	Cellular response to topologically incorrect protein	SOLYC06G076020.3 SOLYC09G008070.3 SOLYC09G075950.1 SOLYC10G086410.3 SOLYC11G066100.2
6.66198e-07	26	2184	Response to stimulus	SOLYC02G064980.1 SOLYC02G090970.1 SOLYC02G090990.1 SOLYC03G096630.1 SOLYC03G112310.1 SOLYC03G113100.3 SOLYC03G117640.1 SOLYC05G009170.2 SOLYC06G076020.3 SOLYC08G080540.3 SOLYC09G008070.3 SOLYC09G075950.1 SOLYC10G086410.3 SOLYC11G066100.2 SOLYC07G008620.1 SOLYC01G110800.3 SOLYC01G110920.3 SOLYC01G110930.1 SOLYC03G093610.1 SOLYC03G123550.1 SOLYC04G072900.1 SOLYC05G052520.3 SOLYC06G065820.3 SOLYC09G…
6.66198e-07	5	22	de novo posttranslational protein folding	SOLYC02G077670.3 SOLYC06G076020.3 SOLYC09G075950.1 SOLYC10G086410.3 SOLYC11G066100.2
6.66198e-07	5	22	Chaperone cofactor-dependent protein refolding	SOLYC02G077670.3 SOLYC06G076020.3 SOLYC09G075950.1 SOLYC10G086410.3 SOLYC11G066100.2
1.12071e-06	7	89	Response to heat	SOLYC06G076020.3 SOLYC08G080540.3 SOLYC09G075950.1 SOLYC10G086410.3 SOLYC11G066100.2 SOLYC09G005120.3 SOLYC11G071830.2
1.95243e-06	10	284	Cellular response to organic substance	SOLYC03G096630.1 SOLYC05G009170.2 SOLYC06G076020.3 SOLYC09G008070.3 SOLYC09G075950.1 SOLYC10G086410.3 SOLYC11G066100.2 SOLYC03G093610.1 SOLYC05G052520.3 SOLYC09G075440.3
1.95243e-06	5	30	de novo protein folding	SOLYC02G077670.3 SOLYC06G076020.3 SOLYC09G075950.1 SOLYC10G086410.3 SOLYC11G066100.2
1.95243e-06	18	1142	Response to stress	SOLYC02G064980.1 SOLYC02G090970.1 SOLYC02G090990.1 SOLYC03G112310.1 SOLYC03G113100.3 SOLYC03G117640.1 SOLYC06G076020.3 SOLYC08G080540.3 SOLYC09G008070.3 SOLYC09G075950.1 SOLYC10G086410.3 SOLYC11G066100.2 SOLYC07G008620.1 SOLYC03G093610.1 SOLYC04G072900.1 SOLYC06G065820.3 SOLYC09G005120.3 SOLYC11G071830.2
3.02122e-06	8	164	Protein folding	SOLYC02G077670.3 SOLYC06G076020.3 SOLYC09G075950.1 SOLYC09G092690.3 SOLYC10G084170.1 SOLYC10G086410.3 SOLYC11G066100.2 SOLYC11G071830.2
4.73466e-06	4	15	Cellular response to unfolded protein	SOLYC06G076020.3 SOLYC09G075950.1 SOLYC10G086410.3 SOLYC11G066100.2
4.73466e-06	4	15	Response to unfolded protein	SOLYC06G076020.3 SOLYC09G075950.1 SOLYC10G086410.3 SOLYC11G066100.2
8.27807e-06	5	42	Cellular response to heat	SOLYC06G076020.3 SOLYC08G080540.3 SOLYC09G075950.1 SOLYC10G086410.3 SOLYC11G066100.2
9.00118e-06	11	452	Cellular response to stress	SOLYC02G064980.1 SOLYC02G090970.1 SOLYC02G090990.1 SOLYC03G113100.3 SOLYC03G117640.1 SOLYC06G076020.3 SOLYC08G080540.3 SOLYC09G008070.3 SOLYC09G075950.1 SOLYC10G086410.3 SOLYC11G066100.2
9.00118e-06	14	784	Response to chemical	SOLYC03G096630.1 SOLYC05G009170.2 SOLYC06G076020.3 SOLYC09G008070.3 SOLYC09G075950.1 SOLYC10G086410.3 SOLYC11G066100.2 SOLYC01G110800.3 SOLYC01G110920.3 SOLYC01G110930.1 SOLYC03G093610.1 SOLYC03G123550.1 SOLYC05G052520.3 SOLYC09G075440.3
9.00118e-06	28	2958	Regulation of biological process	SOLYC02G064980.1 SOLYC02G090970.1 SOLYC02G090990.1 SOLYC03G096630.1 SOLYC03G117640.1 SOLYC05G009170.2 SOLYC06G074030.1 SOLYC08G080540.3 SOLYC10G008260.2 SOLYC02G069260.3 SOLYC03G093610.1 SOLYC03G112310.1 SOLYC03G116890.3 SOLYC03G119390.3 SOLYC03G121400.1 SOLYC04G072900.1 SOLYC05G052520.3 SOLYC06G065820.3 SOLYC07G053610.3 SOLYC09G011170.3 SOLYC09G015770.3 SOLYC09G075440.3 SOLYC10G006130.1 SOLYC10G…
9.54132e-06	17	1184	Cellular response to stimulus	SOLYC02G064980.1 SOLYC02G090970.1 SOLYC02G090990.1 SOLYC03G096630.1 SOLYC03G113100.3 SOLYC03G117640.1 SOLYC05G009170.2 SOLYC06G076020.3 SOLYC08G080540.3 SOLYC09G008070.3 SOLYC09G075950.1 SOLYC10G086410.3 SOLYC11G066100.2 SOLYC03G093610.1 SOLYC03G112310.1 SOLYC05G052520.3 SOLYC09G075440.3
9.811e-06	21	1791	Regulation of nitrogen compound metabolic process	SOLYC02G064980.1 SOLYC02G090970.1 SOLYC02G090990.1 SOLYC03G117640.1 SOLYC06G074030.1 SOLYC08G080540.3 SOLYC10G008260.2 SOLYC03G093610.1 SOLYC03G116890.3 SOLYC03G119390.3 SOLYC03G121400.1 SOLYC04G072900.1 SOLYC06G065820.3 SOLYC07G053610.3 SOLYC09G011170.3 SOLYC09G015770.3 SOLYC10G006130.1 SOLYC10G050970.1 SOLYC11G012980.1 SOLYC12G009240.1 SOLYC12G049560.2
1.02248e-05	22	1963	Regulation of macromolecule metabolic process	SOLYC02G064980.1 SOLYC02G090970.1 SOLYC02G090990.1 SOLYC03G117640.1 SOLYC06G074030.1 SOLYC08G080540.3 SOLYC10G008260.2 SOLYC02G069260.3 SOLYC03G093610.1 SOLYC03G116890.3 SOLYC03G119390.3 SOLYC03G121400.1 SOLYC04G072900.1 SOLYC06G065820.3 SOLYC07G053610.3 SOLYC09G011170.3 SOLYC09G015770.3 SOLYC10G006130.1 SOLYC10G050970.1 SOLYC11G012980.1 SOLYC12G009240.1 SOLYC12G049560.2
1.06811e-05	21	1811	Regulation of primary metabolic process	SOLYC02G064980.1 SOLYC02G090970.1 SOLYC02G090990.1 SOLYC03G117640.1 SOLYC06G074030.1 SOLYC08G080540.3 SOLYC10G008260.2 SOLYC03G093610.1 SOLYC03G116890.3 SOLYC03G119390.3 SOLYC03G121400.1 SOLYC04G072900.1 SOLYC06G065820.3 SOLYC07G053610.3 SOLYC09G011170.3 SOLYC09G015770.3 SOLYC10G006130.1 SOLYC10G050970.1 SOLYC11G012980.1 SOLYC12G009240.1 SOLYC12G049560.2
1.09399e-05	29	3229	Biological regulation	SOLYC02G064980.1 SOLYC02G090970.1 SOLYC02G090990.1 SOLYC03G096630.1 SOLYC03G117640.1 SOLYC04G006940.3 SOLYC05G009170.2 SOLYC06G074030.1 SOLYC08G080540.3 SOLYC10G008260.2 SOLYC02G069260.3 SOLYC03G093610.1 SOLYC03G112310.1 SOLYC03G116890.3 SOLYC03G119390.3 SOLYC03G121400.1 SOLYC04G072900.1 SOLYC05G052520.3 SOLYC06G065820.3 SOLYC07G053610.3 SOLYC09G011170.3 SOLYC09G015770.3 SOLYC09G075440.3 SOLYC10G…
1.09399e-05	10	379	Cellular response to chemical stimulus	SOLYC03G096630.1 SOLYC05G009170.2 SOLYC06G076020.3 SOLYC09G008070.3 SOLYC09G075950.1 SOLYC10G086410.3 SOLYC11G066100.2 SOLYC03G093610.1 SOLYC05G052520.3 SOLYC09G075440.3
1.19028e-05	26	2702	Regulation of cellular process	SOLYC02G064980.1 SOLYC02G090970.1 SOLYC02G090990.1 SOLYC03G096630.1 SOLYC03G117640.1 SOLYC05G009170.2 SOLYC06G074030.1 SOLYC08G080540.3 SOLYC10G008260.2 SOLYC03G093610.1 SOLYC03G112310.1 SOLYC03G116890.3 SOLYC03G119390.3 SOLYC03G121400.1 SOLYC04G072900.1 SOLYC05G052520.3 SOLYC06G065820.3 SOLYC07G053610.3 SOLYC09G011170.3 SOLYC09G015770.3 SOLYC09G075440.3 SOLYC10G006130.1 SOLYC10G050970.1 SOLYC11G…
1.19028e-05	7	149	Response to temperature stimulus	SOLYC06G076020.3 SOLYC08G080540.3 SOLYC09G075950.1 SOLYC10G086410.3 SOLYC11G066100.2 SOLYC09G005120.3 SOLYC11G071830.2
1.29209e-05	4	22	Protein refolding	SOLYC06G076020.3 SOLYC09G075950.1 SOLYC10G086410.3 SOLYC11G066100.2
1.32409e-05	22	2032	Regulation of metabolic process	SOLYC02G064980.1 SOLYC02G090970.1 SOLYC02G090990.1 SOLYC03G117640.1 SOLYC06G074030.1 SOLYC08G080540.3 SOLYC10G008260.2 SOLYC02G069260.3 SOLYC03G093610.1 SOLYC03G116890.3 SOLYC03G119390.3 SOLYC03G121400.1 SOLYC04G072900.1 SOLYC06G065820.3 SOLYC07G053610.3 SOLYC09G011170.3 SOLYC09G015770.3 SOLYC10G006130.1 SOLYC10G050970.1 SOLYC11G012980.1 SOLYC12G009240.1 SOLYC12G049560.2
1.32409e-05	21	1867	Regulation of cellular metabolic process	SOLYC02G064980.1 SOLYC02G090970.1 SOLYC02G090990.1 SOLYC03G117640.1 SOLYC06G074030.1 SOLYC08G080540.3 SOLYC10G008260.2 SOLYC03G093610.1 SOLYC03G116890.3 SOLYC03G119390.3 SOLYC03G121400.1 SOLYC04G072900.1 SOLYC06G065820.3 SOLYC07G053610.3 SOLYC09G011170.3 SOLYC09G015770.3 SOLYC10G006130.1 SOLYC10G050970.1 SOLYC11G012980.1 SOLYC12G009240.1 SOLYC12G049560.2
9.33429e-05	5	78	Signal transduction by protein phosphorylation	SOLYC02G064980.1 SOLYC02G090970.1 SOLYC02G090990.1 SOLYC03G117640.1 SOLYC09G075440.3
0.000199733	18	1708	Regulation of gene expression	SOLYC06G074030.1 SOLYC08G080540.3 SOLYC10G008260.2 SOLYC02G069260.3 SOLYC03G093610.1 SOLYC03G116890.3 SOLYC03G119390.3 SOLYC03G121400.1 SOLYC04G072900.1 SOLYC06G065820.3 SOLYC07G053610.3 SOLYC09G011170.3 SOLYC09G015770.3 SOLYC10G006130.1 SOLYC10G050970.1 SOLYC11G012980.1 SOLYC12G009240.1 SOLYC12G049560.2
0.000230143	17	1563	Regulation of cellular macromolecule biosynthetic process	SOLYC06G074030.1 SOLYC08G080540.3 SOLYC10G008260.2 SOLYC03G093610.1 SOLYC03G116890.3 SOLYC03G119390.3 SOLYC03G121400.1 SOLYC04G072900.1 SOLYC06G065820.3 SOLYC07G053610.3 SOLYC09G011170.3 SOLYC09G015770.3 SOLYC10G006130.1 SOLYC10G050970.1 SOLYC11G012980.1 SOLYC12G009240.1 SOLYC12G049560.2
0.000232452	17	1568	Regulation of macromolecule biosynthetic process	SOLYC06G074030.1 SOLYC08G080540.3 SOLYC10G008260.2 SOLYC03G093610.1 SOLYC03G116890.3 SOLYC03G119390.3 SOLYC03G121400.1 SOLYC04G072900.1 SOLYC06G065820.3 SOLYC07G053610.3 SOLYC09G011170.3 SOLYC09G015770.3 SOLYC10G006130.1 SOLYC10G050970.1 SOLYC11G012980.1 SOLYC12G009240.1 SOLYC12G049560.2
0.000234585	4	47	Stress-activated protein kinase signaling cascade	SOLYC02G064980.1 SOLYC02G090970.1 SOLYC02G090990.1 SOLYC03G117640.1
0.000255474	17	1587	Regulation of cellular biosynthetic process	SOLYC06G074030.1 SOLYC08G080540.3 SOLYC10G008260.2 SOLYC03G093610.1 SOLYC03G116890.3 SOLYC03G119390.3 SOLYC03G121400.1 SOLYC04G072900.1 SOLYC06G065820.3 SOLYC07G053610.3 SOLYC09G011170.3 SOLYC09G015770.3 SOLYC10G006130.1 SOLYC10G050970.1 SOLYC11G012980.1 SOLYC12G009240.1 SOLYC12G049560.2
0.000258494	17	1592	Regulation of biosynthetic process	SOLYC06G074030.1 SOLYC08G080540.3 SOLYC10G008260.2 SOLYC03G093610.1 SOLYC03G116890.3 SOLYC03G119390.3 SOLYC03G121400.1 SOLYC04G072900.1 SOLYC06G065820.3 SOLYC07G053610.3 SOLYC09G011170.3 SOLYC09G015770.3 SOLYC10G006130.1 SOLYC10G050970.1 SOLYC11G012980.1 SOLYC12G009240.1 SOLYC12G049560.2
0.0003591	16	1475	Regulation of transcription, DNA-templated	SOLYC08G080540.3 SOLYC10G008260.2 SOLYC03G093610.1 SOLYC03G116890.3 SOLYC03G119390.3 SOLYC03G121400.1 SOLYC04G072900.1 SOLYC06G065820.3 SOLYC07G053610.3 SOLYC09G011170.3 SOLYC09G015770.3 SOLYC10G006130.1 SOLYC10G050970.1 SOLYC11G012980.1 SOLYC12G009240.1 SOLYC12G049560.2
0.0003591	16	1477	Regulation of nucleic acid-templated transcription	SOLYC08G080540.3 SOLYC10G008260.2 SOLYC03G093610.1 SOLYC03G116890.3 SOLYC03G119390.3 SOLYC03G121400.1 SOLYC04G072900.1 SOLYC06G065820.3 SOLYC07G053610.3 SOLYC09G011170.3 SOLYC09G015770.3 SOLYC10G006130.1 SOLYC10G050970.1 SOLYC11G012980.1 SOLYC12G009240.1 SOLYC12G049560.2
0.0003591	16	1477	Regulation of RNA biosynthetic process	SOLYC08G080540.3 SOLYC10G008260.2 SOLYC03G093610.1 SOLYC03G116890.3 SOLYC03G119390.3 SOLYC03G121400.1 SOLYC04G072900.1 SOLYC06G065820.3 SOLYC07G053610.3 SOLYC09G011170.3 SOLYC09G015770.3 SOLYC10G006130.1 SOLYC10G050970.1 SOLYC11G012980.1 SOLYC12G009240.1 SOLYC12G049560.2
0.00039684	9	484	Response to hormone	SOLYC03G096630.1 SOLYC05G009170.2 SOLYC01G110800.3 SOLYC01G110920.3 SOLYC01G110930.1 SOLYC03G093610.1 SOLYC03G123550.1 SOLYC05G052520.3 SOLYC09G075440.3
0.000412598	16	1508	Regulation of RNA metabolic process	SOLYC08G080540.3 SOLYC10G008260.2 SOLYC03G093610.1 SOLYC03G116890.3 SOLYC03G119390.3 SOLYC03G121400.1 SOLYC04G072900.1 SOLYC06G065820.3 SOLYC07G053610.3 SOLYC09G011170.3 SOLYC09G015770.3 SOLYC10G006130.1 SOLYC10G050970.1 SOLYC11G012980.1 SOLYC12G009240.1 SOLYC12G049560.2
0.000412598	17	1677	Transcription, DNA-templated	SOLYC08G080540.3 SOLYC10G008260.2 SOLYC03G093610.1 SOLYC03G116890.3 SOLYC03G119390.3 SOLYC03G121400.1 SOLYC04G072900.1 SOLYC04G076970.3 SOLYC06G065820.3 SOLYC07G053610.3 SOLYC09G011170.3 SOLYC09G015770.3 SOLYC10G006130.1 SOLYC10G050970.1 SOLYC11G012980.1 SOLYC12G009240.1 SOLYC12G049560.2
0.000412598	17	1679	Nucleic acid-templated transcription	SOLYC08G080540.3 SOLYC10G008260.2 SOLYC03G093610.1 SOLYC03G116890.3 SOLYC03G119390.3 SOLYC03G121400.1 SOLYC04G072900.1 SOLYC04G076970.3 SOLYC06G065820.3 SOLYC07G053610.3 SOLYC09G011170.3 SOLYC09G015770.3 SOLYC10G006130.1 SOLYC10G050970.1 SOLYC11G012980.1 SOLYC12G009240.1 SOLYC12G049560.2
0.000412598	9	492	Response to endogenous stimulus	SOLYC03G096630.1 SOLYC05G009170.2 SOLYC01G110800.3 SOLYC01G110920.3 SOLYC01G110930.1 SOLYC03G093610.1 SOLYC03G123550.1 SOLYC05G052520.3 SOLYC09G075440.3
0.000415538	17	1683	RNA biosynthetic process	SOLYC08G080540.3 SOLYC10G008260.2 SOLYC03G093610.1 SOLYC03G116890.3 SOLYC03G119390.3 SOLYC03G121400.1 SOLYC04G072900.1 SOLYC04G076970.3 SOLYC06G065820.3 SOLYC07G053610.3 SOLYC09G011170.3 SOLYC09G015770.3 SOLYC10G006130.1 SOLYC10G050970.1 SOLYC11G012980.1 SOLYC12G009240.1 SOLYC12G049560.2
0.000428981	4	59	Activation of protein kinase activity	SOLYC02G064980.1 SOLYC02G090970.1 SOLYC02G090990.1 SOLYC03G117640.1
0.000431973	19	2049	Aromatic compound biosynthetic process	SOLYC03G120090.1 SOLYC08G080540.3 SOLYC10G008260.2 SOLYC02G093250.3 SOLYC03G093610.1 SOLYC03G116890.3 SOLYC03G119390.3 SOLYC03G121400.1 SOLYC04G072900.1 SOLYC04G076970.3 SOLYC06G065820.3 SOLYC07G053610.3 SOLYC09G011170.3 SOLYC09G015770.3 SOLYC10G006130.1 SOLYC10G050970.1 SOLYC11G012980.1 SOLYC12G009240.1 SOLYC12G049560.2
0.000454438	16	1533	Regulation of nucleobase-containing compound metabolic process	SOLYC08G080540.3 SOLYC10G008260.2 SOLYC03G093610.1 SOLYC03G116890.3 SOLYC03G119390.3 SOLYC03G121400.1 SOLYC04G072900.1 SOLYC06G065820.3 SOLYC07G053610.3 SOLYC09G011170.3 SOLYC09G015770.3 SOLYC10G006130.1 SOLYC10G050970.1 SOLYC11G012980.1 SOLYC12G009240.1 SOLYC12G049560.2
0.000460763	3	22	Ethylene-activated signaling pathway	SOLYC03G096630.1 SOLYC03G093610.1 SOLYC09G075440.3
0.000578112	4	65	Positive regulation of protein kinase activity	SOLYC02G064980.1 SOLYC02G090970.1 SOLYC02G090990.1 SOLYC03G117640.1
0.000578998	3	24	Cellular response to ethylene stimulus	SOLYC03G096630.1 SOLYC03G093610.1 SOLYC09G075440.3
0.000590221	4	66	Positive regulation of kinase activity	SOLYC02G064980.1 SOLYC02G090970.1 SOLYC02G090990.1 SOLYC03G117640.1
0.000640907	4	69	Positive regulation of phosphorus metabolic process	SOLYC02G064980.1 SOLYC02G090970.1 SOLYC02G090990.1 SOLYC03G117640.1
0.000640907	4	68	Positive regulation of protein phosphorylation	SOLYC02G064980.1 SOLYC02G090970.1 SOLYC02G090990.1 SOLYC03G117640.1
0.000640907	4	69	Positive regulation of phosphorylation	SOLYC02G064980.1 SOLYC02G090970.1 SOLYC02G090990.1 SOLYC03G117640.1
0.000640907	4	69	Positive regulation of phosphate metabolic process	SOLYC02G064980.1 SOLYC02G090970.1 SOLYC02G090990.1 SOLYC03G117640.1
0.000640907	19	2138	Organic cyclic compound biosynthetic process	SOLYC03G120090.1 SOLYC08G080540.3 SOLYC10G008260.2 SOLYC02G093250.3 SOLYC03G093610.1 SOLYC03G116890.3 SOLYC03G119390.3 SOLYC03G121400.1 SOLYC04G072900.1 SOLYC04G076970.3 SOLYC06G065820.3 SOLYC07G053610.3 SOLYC09G011170.3 SOLYC09G015770.3 SOLYC10G006130.1 SOLYC10G050970.1 SOLYC11G012980.1 SOLYC12G009240.1 SOLYC12G049560.2
0.000658331	11	812	Cell communication	SOLYC02G064980.1 SOLYC02G090970.1 SOLYC02G090990.1 SOLYC03G096630.1 SOLYC03G117640.1 SOLYC05G009170.2 SOLYC03G093610.1 SOLYC03G112310.1 SOLYC05G052520.3 SOLYC07G063770.3 SOLYC09G075440.3
0.000857232	4	75	Positive regulation of transferase activity	SOLYC02G064980.1 SOLYC02G090970.1 SOLYC02G090990.1 SOLYC03G117640.1
0.000935668	18	2028	Heterocycle biosynthetic process	SOLYC03G120090.1 SOLYC08G080540.3 SOLYC10G008260.2 SOLYC03G093610.1 SOLYC03G116890.3 SOLYC03G119390.3 SOLYC03G121400.1 SOLYC04G072900.1 SOLYC04G076970.3 SOLYC06G065820.3 SOLYC07G053610.3 SOLYC09G011170.3 SOLYC09G015770.3 SOLYC10G006130.1 SOLYC10G050970.1 SOLYC11G012980.1 SOLYC12G009240.1 SOLYC12G049560.2
0.000935668	7	333	Intracellular signal transduction	SOLYC02G064980.1 SOLYC02G090970.1 SOLYC02G090990.1 SOLYC03G096630.1 SOLYC03G117640.1 SOLYC03G093610.1 SOLYC09G075440.3
0.00102941	10	717	Signal transduction	SOLYC02G064980.1 SOLYC02G090970.1 SOLYC02G090990.1 SOLYC03G096630.1 SOLYC03G117640.1 SOLYC05G009170.2 SOLYC03G093610.1 SOLYC03G112310.1 SOLYC05G052520.3 SOLYC09G075440.3
0.00105958	10	721	Signaling	SOLYC02G064980.1 SOLYC02G090970.1 SOLYC02G090990.1 SOLYC03G096630.1 SOLYC03G117640.1 SOLYC05G009170.2 SOLYC03G093610.1 SOLYC03G112310.1 SOLYC05G052520.3 SOLYC09G075440.3
0.0011858	17	1889	Nucleobase-containing compound biosynthetic process	SOLYC08G080540.3 SOLYC10G008260.2 SOLYC03G093610.1 SOLYC03G116890.3 SOLYC03G119390.3 SOLYC03G121400.1 SOLYC04G072900.1 SOLYC04G076970.3 SOLYC06G065820.3 SOLYC07G053610.3 SOLYC09G011170.3 SOLYC09G015770.3 SOLYC10G006130.1 SOLYC10G050970.1 SOLYC11G012980.1 SOLYC12G009240.1 SOLYC12G049560.2
0.00126338	4	85	Positive regulation of protein modification process	SOLYC02G064980.1 SOLYC02G090970.1 SOLYC02G090990.1 SOLYC03G117640.1
0.00226093	3	41	Response to ethylene	SOLYC03G096630.1 SOLYC03G093610.1 SOLYC09G075440.3
0.00295267	4	107	Regulation of protein kinase activity	SOLYC02G064980.1 SOLYC02G090970.1 SOLYC02G090990.1 SOLYC03G117640.1
0.00301341	4	108	Regulation of kinase activity	SOLYC02G064980.1 SOLYC02G090970.1 SOLYC02G090990.1 SOLYC03G117640.1
0.00318288	4	110	Positive regulation of catalytic activity	SOLYC02G064980.1 SOLYC02G090970.1 SOLYC02G090990.1 SOLYC03G117640.1
0.00358942	4	114	Positive regulation of molecular function	SOLYC02G064980.1 SOLYC02G090970.1 SOLYC02G090990.1 SOLYC03G117640.1
0.0039017	4	117	Positive regulation of cellular protein metabolic process	SOLYC02G064980.1 SOLYC02G090970.1 SOLYC02G090990.1 SOLYC03G117640.1
0.00397233	4	118	Regulation of transferase activity	SOLYC02G064980.1 SOLYC02G090970.1 SOLYC02G090990.1 SOLYC03G117640.1
0.00430424	4	121	Positive regulation of protein metabolic process	SOLYC02G064980.1 SOLYC02G090970.1 SOLYC02G090990.1 SOLYC03G117640.1
0.00487326	4	126	Regulation of protein phosphorylation	SOLYC02G064980.1 SOLYC02G090970.1 SOLYC02G090990.1 SOLYC03G117640.1
0.00487326	7	454	Response to abiotic stimulus	SOLYC06G076020.3 SOLYC08G080540.3 SOLYC09G075950.1 SOLYC10G086410.3 SOLYC11G066100.2 SOLYC09G005120.3 SOLYC11G071830.2
0.00495286	4	127	Regulation of phosphorylation	SOLYC02G064980.1 SOLYC02G090970.1 SOLYC02G090990.1 SOLYC03G117640.1
0.00603181	5	231	Hormone-mediated signaling pathway	SOLYC03G096630.1 SOLYC05G009170.2 SOLYC03G093610.1 SOLYC05G052520.3 SOLYC09G075440.3
0.0068385	19	2656	Cellular nitrogen compound biosynthetic process	SOLYC03G120090.1 SOLYC06G074030.1 SOLYC08G080540.3 SOLYC10G008260.2 SOLYC03G093610.1 SOLYC03G116890.3 SOLYC03G119390.3 SOLYC03G121400.1 SOLYC04G072900.1 SOLYC04G076970.3 SOLYC06G065820.3 SOLYC07G053610.3 SOLYC09G011170.3 SOLYC09G015770.3 SOLYC10G006130.1 SOLYC10G050970.1 SOLYC11G012980.1 SOLYC12G009240.1 SOLYC12G049560.2
0.00722145	5	242	Cellular response to hormone stimulus	SOLYC03G096630.1 SOLYC05G009170.2 SOLYC03G093610.1 SOLYC05G052520.3 SOLYC09G075440.3
0.00822679	5	250	Cellular response to endogenous stimulus	SOLYC03G096630.1 SOLYC05G009170.2 SOLYC03G093610.1 SOLYC05G052520.3 SOLYC09G075440.3
0.00897852	18	2517	RNA metabolic process	SOLYC06G074030.1 SOLYC08G080540.3 SOLYC10G008260.2 SOLYC03G093610.1 SOLYC03G116890.3 SOLYC03G119390.3 SOLYC03G121400.1 SOLYC04G072900.1 SOLYC04G076970.3 SOLYC06G065820.3 SOLYC07G053610.3 SOLYC09G011170.3 SOLYC09G015770.3 SOLYC10G006130.1 SOLYC10G050970.1 SOLYC11G012980.1 SOLYC12G009240.1 SOLYC12G049560.2
0.01059	5	267	Regulation of cellular protein metabolic process	SOLYC02G064980.1 SOLYC02G090970.1 SOLYC02G090990.1 SOLYC03G117640.1 SOLYC06G074030.1
0.01059	16	2148	Protein modification process	SOLYC02G064980.1 SOLYC02G090970.1 SOLYC02G090990.1 SOLYC03G113100.3 SOLYC03G117640.1 SOLYC07G063770.3 SOLYC09G092690.3 SOLYC12G005450.1 SOLYC03G112310.1 SOLYC03G114160.1 SOLYC04G063380.3 SOLYC05G052520.3 SOLYC09G056450.3 SOLYC09G075440.3 SOLYC10G085590.1 SOLYC11G020230.1
0.01059	16	2148	Cellular protein modification process	SOLYC02G064980.1 SOLYC02G090970.1 SOLYC02G090990.1 SOLYC03G113100.3 SOLYC03G117640.1 SOLYC07G063770.3 SOLYC09G092690.3 SOLYC12G005450.1 SOLYC03G112310.1 SOLYC03G114160.1 SOLYC04G063380.3 SOLYC05G052520.3 SOLYC09G056450.3 SOLYC09G075440.3 SOLYC10G085590.1 SOLYC11G020230.1
0.0107091	4	162	Regulation of phosphate metabolic process	SOLYC02G064980.1 SOLYC02G090970.1 SOLYC02G090990.1 SOLYC03G117640.1
0.0107091	4	162	Regulation of phosphorus metabolic process	SOLYC02G064980.1 SOLYC02G090970.1 SOLYC02G090990.1 SOLYC03G117640.1
0.0118145	5	277	Regulation of protein metabolic process	SOLYC02G064980.1 SOLYC02G090970.1 SOLYC02G090990.1 SOLYC03G117640.1 SOLYC06G074030.1
0.0121307	19	2822	Nucleic acid metabolic process	SOLYC03G113100.3 SOLYC06G074030.1 SOLYC08G080540.3 SOLYC10G008260.2 SOLYC03G093610.1 SOLYC03G116890.3 SOLYC03G119390.3 SOLYC03G121400.1 SOLYC04G072900.1 SOLYC04G076970.3 SOLYC06G065820.3 SOLYC07G053610.3 SOLYC09G011170.3 SOLYC09G015770.3 SOLYC10G006130.1 SOLYC10G050970.1 SOLYC11G012980.1 SOLYC12G009240.1 SOLYC12G049560.2
0.0121799	3	81	Phosphorelay signal transduction system	SOLYC03G096630.1 SOLYC03G093610.1 SOLYC09G075440.3
0.0143685	4	178	Regulation of protein modification process	SOLYC02G064980.1 SOLYC02G090970.1 SOLYC02G090990.1 SOLYC03G117640.1
0.0177189	18	2710	Cellular macromolecule biosynthetic process	SOLYC06G074030.1 SOLYC08G080540.3 SOLYC10G008260.2 SOLYC03G093610.1 SOLYC03G116890.3 SOLYC03G119390.3 SOLYC03G121400.1 SOLYC04G072900.1 SOLYC04G076970.3 SOLYC06G065820.3 SOLYC07G053610.3 SOLYC09G011170.3 SOLYC09G015770.3 SOLYC10G006130.1 SOLYC10G050970.1 SOLYC11G012980.1 SOLYC12G009240.1 SOLYC12G049560.2
0.0190969	4	194	Response to auxin	SOLYC01G110800.3 SOLYC01G110920.3 SOLYC01G110930.1 SOLYC03G123550.1
0.0193785	18	2739	Macromolecule biosynthetic process	SOLYC06G074030.1 SOLYC08G080540.3 SOLYC10G008260.2 SOLYC03G093610.1 SOLYC03G116890.3 SOLYC03G119390.3 SOLYC03G121400.1 SOLYC04G072900.1 SOLYC04G076970.3 SOLYC06G065820.3 SOLYC07G053610.3 SOLYC09G011170.3 SOLYC09G015770.3 SOLYC10G006130.1 SOLYC10G050970.1 SOLYC11G012980.1 SOLYC12G009240.1 SOLYC12G049560.2
0.0205459	21	3430	Cellular aromatic compound metabolic process	SOLYC03G113100.3 SOLYC03G120090.1 SOLYC06G074030.1 SOLYC08G080540.3 SOLYC10G008260.2 SOLYC02G093250.3 SOLYC03G093610.1 SOLYC03G116890.3 SOLYC03G119390.3 SOLYC03G121400.1 SOLYC04G072900.1 SOLYC04G076970.3 SOLYC06G065820.3 SOLYC07G053610.3 SOLYC09G011170.3 SOLYC09G015770.3 SOLYC10G006130.1 SOLYC10G050970.1 SOLYC11G012980.1 SOLYC12G009240.1 SOLYC12G049560.2
0.0208782	19	2986	Gene expression	SOLYC06G074030.1 SOLYC08G080540.3 SOLYC10G008260.2 SOLYC02G069260.3 SOLYC03G093610.1 SOLYC03G116890.3 SOLYC03G119390.3 SOLYC03G121400.1 SOLYC04G072900.1 SOLYC04G076970.3 SOLYC06G065820.3 SOLYC07G053610.3 SOLYC09G011170.3 SOLYC09G015770.3 SOLYC10G006130.1 SOLYC10G050970.1 SOLYC11G012980.1 SOLYC12G009240.1 SOLYC12G049560.2
0.0253331	21	3500	Organic cyclic compound metabolic process	SOLYC03G113100.3 SOLYC03G120090.1 SOLYC06G074030.1 SOLYC08G080540.3 SOLYC10G008260.2 SOLYC02G093250.3 SOLYC03G093610.1 SOLYC03G116890.3 SOLYC03G119390.3 SOLYC03G121400.1 SOLYC04G072900.1 SOLYC04G076970.3 SOLYC06G065820.3 SOLYC07G053610.3 SOLYC09G011170.3 SOLYC09G015770.3 SOLYC10G006130.1 SOLYC10G050970.1 SOLYC11G012980.1 SOLYC12G009240.1 SOLYC12G049560.2
0.0287422	5	351	Defense response	SOLYC03G112310.1 SOLYC07G008620.1 SOLYC03G093610.1 SOLYC04G072900.1 SOLYC06G065820.3
0.0290231	16	2422	Macromolecule modification	SOLYC02G064980.1 SOLYC02G090970.1 SOLYC02G090990.1 SOLYC03G113100.3 SOLYC03G117640.1 SOLYC07G063770.3 SOLYC09G092690.3 SOLYC12G005450.1 SOLYC03G112310.1 SOLYC03G114160.1 SOLYC04G063380.3 SOLYC05G052520.3 SOLYC09G056450.3 SOLYC09G075440.3 SOLYC10G085590.1 SOLYC11G020230.1
0.0306107	3	117	Proteasome-mediated ubiquitin-dependent protein catabolic process	SOLYC03G113100.3 SOLYC04G063380.3 SOLYC09G008070.3
0.03225	20	3357	Heterocycle metabolic process	SOLYC03G113100.3 SOLYC03G120090.1 SOLYC06G074030.1 SOLYC08G080540.3 SOLYC10G008260.2 SOLYC03G093610.1 SOLYC03G116890.3 SOLYC03G119390.3 SOLYC03G121400.1 SOLYC04G072900.1 SOLYC04G076970.3 SOLYC06G065820.3 SOLYC07G053610.3 SOLYC09G011170.3 SOLYC09G015770.3 SOLYC10G006130.1 SOLYC10G050970.1 SOLYC11G012980.1 SOLYC12G009240.1 SOLYC12G049560.2
0.0336479	3	122	Proteasomal protein catabolic process	SOLYC03G113100.3 SOLYC04G063380.3 SOLYC09G008070.3
0.0353165	19	3161	Nucleobase-containing compound metabolic process	SOLYC03G113100.3 SOLYC06G074030.1 SOLYC08G080540.3 SOLYC10G008260.2 SOLYC03G093610.1 SOLYC03G116890.3 SOLYC03G119390.3 SOLYC03G121400.1 SOLYC04G072900.1 SOLYC04G076970.3 SOLYC06G065820.3 SOLYC07G053610.3 SOLYC09G011170.3 SOLYC09G015770.3 SOLYC10G006130.1 SOLYC10G050970.1 SOLYC11G012980.1 SOLYC12G009240.1 SOLYC12G049560.2
0.039458	4	247	Regulation of catalytic activity	SOLYC02G064980.1 SOLYC02G090970.1 SOLYC02G090990.1 SOLYC03G117640.1
0.0398557	1	3	Stomatal lineage progression	SOLYC05G052520.3
0.0398557	1	3	Positive regulation of developmental growth	SOLYC12G096570.1
0.0398557	5	387	Positive regulation of nitrogen compound metabolic process	SOLYC02G064980.1 SOLYC02G090970.1 SOLYC02G090990.1 SOLYC03G117640.1 SOLYC08G080540.3
0.0405522	5	395	Positive regulation of macromolecule metabolic process	SOLYC02G064980.1 SOLYC02G090970.1 SOLYC02G090990.1 SOLYC03G117640.1 SOLYC08G080540.3
0.0405522	20	3468	Protein metabolic process	SOLYC02G064980.1 SOLYC02G065050.1 SOLYC02G090970.1 SOLYC02G090990.1 SOLYC03G113100.3 SOLYC03G117640.1 SOLYC04G063380.3 SOLYC06G074030.1 SOLYC07G063770.3 SOLYC09G008070.3 SOLYC09G092690.3 SOLYC12G005450.1 SOLYC03G112310.1 SOLYC03G114160.1 SOLYC03G115230.3 SOLYC05G052520.3 SOLYC09G056450.3 SOLYC09G075440.3 SOLYC10G085590.1 SOLYC11G020230.1
0.0405522	5	393	Positive regulation of cellular metabolic process	SOLYC02G064980.1 SOLYC02G090970.1 SOLYC02G090990.1 SOLYC03G117640.1 SOLYC08G080540.3
0.0405522	6	549	Positive regulation of biological process	SOLYC02G064980.1 SOLYC02G090970.1 SOLYC02G090990.1 SOLYC03G117640.1 SOLYC08G080540.3 SOLYC12G096570.1
0.0405522	4	255	Regulation of molecular function	SOLYC02G064980.1 SOLYC02G090970.1 SOLYC02G090990.1 SOLYC03G117640.1
0.0405522	2	46	Plant epidermis development	SOLYC05G009170.2 SOLYC05G052520.3
0.0410848	18	3010	Cellular protein metabolic process	SOLYC02G064980.1 SOLYC02G090970.1 SOLYC02G090990.1 SOLYC03G113100.3 SOLYC03G117640.1 SOLYC04G063380.3 SOLYC06G074030.1 SOLYC07G063770.3 SOLYC09G008070.3 SOLYC09G092690.3 SOLYC12G005450.1 SOLYC03G112310.1 SOLYC03G114160.1 SOLYC05G052520.3 SOLYC09G056450.3 SOLYC09G075440.3 SOLYC10G085590.1 SOLYC11G020230.1
0.0429609	4	261	Protein ubiquitination	SOLYC03G113100.3 SOLYC03G114160.1 SOLYC04G063380.3 SOLYC09G056450.3
0.0445256	5	408	Positive regulation of metabolic process	SOLYC02G064980.1 SOLYC02G090970.1 SOLYC02G090990.1 SOLYC03G117640.1 SOLYC08G080540.3
0.0472573	1	4	Mitotic spindle disassembly	SOLYC09G008070.3
0.0472573	1	4	Spindle disassembly	SOLYC09G008070.3
0.0472573	1	4	Autophagosome maturation	SOLYC09G008070.3
0.0472573	1	4	Pyridoxine biosynthetic process	SOLYC03G120090.1
0.0483779	23	4276	Organonitrogen compound metabolic process	SOLYC02G064980.1 SOLYC02G065050.1 SOLYC02G090970.1 SOLYC02G090990.1 SOLYC03G113100.3 SOLYC03G117640.1 SOLYC03G120090.1 SOLYC04G063380.3 SOLYC06G074030.1 SOLYC07G063770.3 SOLYC07G064600.3 SOLYC08G068690.1 SOLYC09G008070.3 SOLYC09G092690.3 SOLYC12G005450.1 SOLYC03G112310.1 SOLYC03G114160.1 SOLYC03G115230.3 SOLYC05G052520.3 SOLYC09G056450.3 SOLYC09G075440.3 SOLYC10G085590.1 SOLYC11G020230.1
0.0489276	20	3559	Cellular biosynthetic process	SOLYC03G120090.1 SOLYC06G074030.1 SOLYC08G080540.3 SOLYC10G008260.2 SOLYC02G093250.3 SOLYC03G093610.1 SOLYC03G116890.3 SOLYC03G119390.3 SOLYC03G121400.1 SOLYC04G072900.1 SOLYC04G076970.3 SOLYC06G065820.3 SOLYC07G053610.3 SOLYC09G011170.3 SOLYC09G015770.3 SOLYC10G006130.1 SOLYC10G050970.1 SOLYC11G012980.1 SOLYC12G009240.1 SOLYC12G049560.2

## Sheet: GOCC enrichment_upregulated
				GOCC terms enrichment of upregulated genes
Enrichment FDR	Genes in list	Total genes	Functional Category	Genes
9.31746e-05	25	2634	Nucleus	SOLYC03G043700.3 SOLYC03G114160.1 SOLYC04G072900.1 SOLYC05G009170.2 SOLYC08G080540.3 SOLYC09G008070.3 SOLYC09G056450.3 SOLYC11G012510.2 SOLYC03G093610.1 SOLYC03G096630.1 SOLYC03G116890.3 SOLYC03G121400.1 SOLYC05G052520.3 SOLYC06G065820.3 SOLYC07G053610.3 SOLYC08G076930.1 SOLYC09G011170.3 SOLYC09G015770.3 SOLYC09G091960.3 SOLYC10G006130.1 SOLYC10G050970.1 SOLYC11G012980.1 SOLYC12G009240.1 SOLYC12G…
0.00392971	28	4064	Cytoplasm	SOLYC02G064980.1 SOLYC02G077670.3 SOLYC02G090970.1 SOLYC02G090990.1 SOLYC03G043700.3 SOLYC03G097410.1 SOLYC03G113100.3 SOLYC03G114160.1 SOLYC03G117640.1 SOLYC04G006940.3 SOLYC06G074030.1 SOLYC06G076020.3 SOLYC07G064600.3 SOLYC09G008070.3 SOLYC09G011030.3 SOLYC09G056450.3 SOLYC09G061760.1 SOLYC09G075440.3 SOLYC09G075950.1 SOLYC09G092690.3 SOLYC10G086410.3 SOLYC11G066100.2 SOLYC11G071830.2 SOLYC03G…

## Sheet: GOMF enrichment_upregulated
					GOMF terms enrichment analysis of upregulated genes
Enrichment FDR	Genes in list	Total genes	Functional Category	Genes
4.21907e-08	6	26	Heat shock protein binding	SOLYC06G076020.3 SOLYC09G075950.1 SOLYC10G086410.3 SOLYC11G066100.2 SOLYC10G078930.2 SOLYC11G071830.2
2.40957e-07	16	730	DNA-binding transcription factor activity	SOLYC03G096630.1 SOLYC03G119390.3 SOLYC05G009170.2 SOLYC08G080540.3 SOLYC11G012510.2 SOLYC03G093610.1 SOLYC03G116890.3 SOLYC04G072900.1 SOLYC06G065820.3 SOLYC09G011170.3 SOLYC09G015770.3 SOLYC10G006130.1 SOLYC10G050970.1 SOLYC11G012980.1 SOLYC12G009240.1 SOLYC12G049560.2
9.70744e-07	4	10	Misfolded protein binding	SOLYC06G076020.3 SOLYC09G075950.1 SOLYC10G086410.3 SOLYC11G066100.2
9.70744e-07	16	842	Transcription regulator activity	SOLYC03G096630.1 SOLYC03G119390.3 SOLYC05G009170.2 SOLYC08G080540.3 SOLYC11G012510.2 SOLYC03G093610.1 SOLYC03G116890.3 SOLYC04G072900.1 SOLYC06G065820.3 SOLYC09G011170.3 SOLYC09G015770.3 SOLYC10G006130.1 SOLYC10G050970.1 SOLYC11G012980.1 SOLYC12G009240.1 SOLYC12G049560.2
1.82112e-06	4	12	Protein folding chaperone	SOLYC06G076020.3 SOLYC09G075950.1 SOLYC10G086410.3 SOLYC11G066100.2
5.70615e-06	18	1265	Molecular function regulator	SOLYC03G096630.1 SOLYC03G119390.3 SOLYC05G009170.2 SOLYC08G080540.3 SOLYC09G011030.3 SOLYC11G012510.2 SOLYC03G093610.1 SOLYC03G116890.3 SOLYC04G072900.1 SOLYC06G065820.3 SOLYC09G011170.3 SOLYC09G015770.3 SOLYC10G006130.1 SOLYC10G050970.1 SOLYC10G078930.2 SOLYC11G012980.1 SOLYC12G009240.1 SOLYC12G049560.2
1.74242e-05	22	2012	DNA binding	SOLYC03G096630.1 SOLYC03G119390.3 SOLYC04G072900.1 SOLYC05G009170.2 SOLYC08G080540.3 SOLYC10G008260.2 SOLYC11G012510.2 SOLYC03G093610.1 SOLYC03G116890.3 SOLYC03G121400.1 SOLYC04G076970.3 SOLYC04G078420.1 SOLYC04G079360.1 SOLYC06G065820.3 SOLYC07G053610.3 SOLYC09G015770.3 SOLYC09G091960.3 SOLYC10G006130.1 SOLYC10G050970.1 SOLYC11G012980.1 SOLYC12G009240.1 SOLYC12G049560.2
4.11872e-05	6	111	Unfolded protein binding	SOLYC02G077670.3 SOLYC06G076020.3 SOLYC09G075950.1 SOLYC10G086410.3 SOLYC11G066100.2 SOLYC11G071830.2
0.000739217	30	4228	Protein binding	SOLYC02G077670.3 SOLYC06G076020.3 SOLYC09G008070.3 SOLYC09G075950.1 SOLYC10G008260.2 SOLYC10G086410.3 SOLYC11G066100.2 SOLYC01G109120.3 SOLYC02G069260.3 SOLYC03G043700.3 SOLYC03G083350.3 SOLYC03G114160.1 SOLYC03G119390.3 SOLYC03G120090.1 SOLYC04G014600.3 SOLYC04G063380.3 SOLYC06G071750.3 SOLYC07G008620.1 SOLYC08G076930.1 SOLYC09G005480.3 SOLYC09G011170.3 SOLYC09G056450.3 SOLYC09G061760.1 SOLYC09G…
0.000996746	10	644	Sequence-specific DNA binding	SOLYC03G119390.3 SOLYC04G072900.1 SOLYC05G009170.2 SOLYC08G080540.3 SOLYC10G008260.2 SOLYC11G012510.2 SOLYC03G116890.3 SOLYC04G076970.3 SOLYC09G015770.3 SOLYC10G006130.1
0.00406482	3	38	Chaperone binding	SOLYC02G077670.3 SOLYC10G078930.2 SOLYC10G084170.1
0.00458394	24	3424	Nucleic acid binding	SOLYC03G096630.1 SOLYC03G119390.3 SOLYC04G072900.1 SOLYC05G009170.2 SOLYC08G080540.3 SOLYC10G008260.2 SOLYC11G012510.2 SOLYC02G069260.3 SOLYC03G093610.1 SOLYC03G116890.3 SOLYC03G121400.1 SOLYC04G076970.3 SOLYC04G078420.1 SOLYC04G079360.1 SOLYC06G065820.3 SOLYC06G074030.1 SOLYC07G053610.3 SOLYC09G015770.3 SOLYC09G091960.3 SOLYC10G006130.1 SOLYC10G050970.1 SOLYC11G012980.1 SOLYC12G009240.1 SOLYC12G…
0.00458394	18	2205	ATP binding	SOLYC06G076020.3 SOLYC09G075950.1 SOLYC10G086410.3 SOLYC11G066100.2 SOLYC02G064980.1 SOLYC02G090970.1 SOLYC02G090990.1 SOLYC03G097410.1 SOLYC03G112310.1 SOLYC03G113100.3 SOLYC03G115230.3 SOLYC03G117640.1 SOLYC04G006940.3 SOLYC07G063770.3 SOLYC09G008070.3 SOLYC11G020230.1 SOLYC11G071830.2 SOLYC12G005450.1
0.00586546	19	2465	Adenyl nucleotide binding	SOLYC06G076020.3 SOLYC09G011030.3 SOLYC09G075950.1 SOLYC10G086410.3 SOLYC11G066100.2 SOLYC02G064980.1 SOLYC02G090970.1 SOLYC02G090990.1 SOLYC03G097410.1 SOLYC03G112310.1 SOLYC03G113100.3 SOLYC03G115230.3 SOLYC03G117640.1 SOLYC04G006940.3 SOLYC07G063770.3 SOLYC09G008070.3 SOLYC11G020230.1 SOLYC11G071830.2 SOLYC12G005450.1
0.0089272	2	13	ATPase regulator activity	SOLYC09G011030.3 SOLYC10G078930.2
0.00916029	7	460	Protein serine/threonine kinase activity	SOLYC02G064980.1 SOLYC02G090970.1 SOLYC02G090990.1 SOLYC03G112310.1 SOLYC03G117640.1 SOLYC07G063770.3 SOLYC12G005450.1
0.0116615	18	2458	Adenyl ribonucleotide binding	SOLYC06G076020.3 SOLYC09G075950.1 SOLYC10G086410.3 SOLYC11G066100.2 SOLYC02G064980.1 SOLYC02G090970.1 SOLYC02G090990.1 SOLYC03G097410.1 SOLYC03G112310.1 SOLYC03G113100.3 SOLYC03G115230.3 SOLYC03G117640.1 SOLYC04G006940.3 SOLYC07G063770.3 SOLYC09G008070.3 SOLYC11G020230.1 SOLYC11G071830.2 SOLYC12G005450.1
0.0116615	18	2450	Purine ribonucleoside triphosphate binding	SOLYC06G076020.3 SOLYC09G075950.1 SOLYC10G086410.3 SOLYC11G066100.2 SOLYC02G064980.1 SOLYC02G090970.1 SOLYC02G090990.1 SOLYC03G097410.1 SOLYC03G112310.1 SOLYC03G113100.3 SOLYC03G115230.3 SOLYC03G117640.1 SOLYC04G006940.3 SOLYC07G063770.3 SOLYC09G008070.3 SOLYC11G020230.1 SOLYC11G071830.2 SOLYC12G005450.1
0.0136148	19	2715	Purine nucleotide binding	SOLYC06G076020.3 SOLYC09G011030.3 SOLYC09G075950.1 SOLYC10G086410.3 SOLYC11G066100.2 SOLYC02G064980.1 SOLYC02G090970.1 SOLYC02G090990.1 SOLYC03G097410.1 SOLYC03G112310.1 SOLYC03G113100.3 SOLYC03G115230.3 SOLYC03G117640.1 SOLYC04G006940.3 SOLYC07G063770.3 SOLYC09G008070.3 SOLYC11G020230.1 SOLYC11G071830.2 SOLYC12G005450.1
0.0146712	19	2745	Ribonucleotide binding	SOLYC06G076020.3 SOLYC09G075950.1 SOLYC10G086410.3 SOLYC11G066100.2 SOLYC02G064980.1 SOLYC02G090970.1 SOLYC02G090990.1 SOLYC03G097410.1 SOLYC03G112310.1 SOLYC03G113100.3 SOLYC03G115230.3 SOLYC03G117640.1 SOLYC04G006940.3 SOLYC07G063770.3 SOLYC09G008070.3 SOLYC11G020230.1 SOLYC11G071830.2 SOLYC12G005450.1 SOLYC12G098850.2
0.0166042	19	2787	Carbohydrate derivative binding	SOLYC06G076020.3 SOLYC09G075950.1 SOLYC10G086410.3 SOLYC11G066100.2 SOLYC02G064980.1 SOLYC02G090970.1 SOLYC02G090990.1 SOLYC03G097410.1 SOLYC03G112310.1 SOLYC03G113100.3 SOLYC03G115230.3 SOLYC03G117640.1 SOLYC04G006940.3 SOLYC07G063770.3 SOLYC09G008070.3 SOLYC11G020230.1 SOLYC11G071830.2 SOLYC12G005450.1 SOLYC12G098850.2
0.0172356	20	3037	Nucleotide binding	SOLYC06G076020.3 SOLYC09G011030.3 SOLYC09G075950.1 SOLYC10G086410.3 SOLYC11G066100.2 SOLYC02G064980.1 SOLYC02G090970.1 SOLYC02G090990.1 SOLYC03G097410.1 SOLYC03G112310.1 SOLYC03G113100.3 SOLYC03G115230.3 SOLYC03G117640.1 SOLYC04G006940.3 SOLYC07G063770.3 SOLYC09G008070.3 SOLYC11G020230.1 SOLYC11G071830.2 SOLYC12G005450.1 SOLYC12G098850.2
0.0172356	20	3037	Nucleoside phosphate binding	SOLYC06G076020.3 SOLYC09G011030.3 SOLYC09G075950.1 SOLYC10G086410.3 SOLYC11G066100.2 SOLYC02G064980.1 SOLYC02G090970.1 SOLYC02G090990.1 SOLYC03G097410.1 SOLYC03G112310.1 SOLYC03G113100.3 SOLYC03G115230.3 SOLYC03G117640.1 SOLYC04G006940.3 SOLYC07G063770.3 SOLYC09G008070.3 SOLYC11G020230.1 SOLYC11G071830.2 SOLYC12G005450.1 SOLYC12G098850.2
0.0182953	21	3286	Small molecule binding	SOLYC06G076020.3 SOLYC09G011030.3 SOLYC09G075950.1 SOLYC10G086410.3 SOLYC11G066100.2 SOLYC02G064980.1 SOLYC02G090970.1 SOLYC02G090990.1 SOLYC03G097410.1 SOLYC03G112310.1 SOLYC03G113100.3 SOLYC03G115230.3 SOLYC03G117640.1 SOLYC04G006940.3 SOLYC07G063770.3 SOLYC08G068600.3 SOLYC09G008070.3 SOLYC11G020230.1 SOLYC11G071830.2 SOLYC12G005450.1 SOLYC12G098850.2
0.0237777	18	2705	Purine ribonucleotide binding	SOLYC06G076020.3 SOLYC09G075950.1 SOLYC10G086410.3 SOLYC11G066100.2 SOLYC02G064980.1 SOLYC02G090970.1 SOLYC02G090990.1 SOLYC03G097410.1 SOLYC03G112310.1 SOLYC03G113100.3 SOLYC03G115230.3 SOLYC03G117640.1 SOLYC04G006940.3 SOLYC07G063770.3 SOLYC09G008070.3 SOLYC11G020230.1 SOLYC11G071830.2 SOLYC12G005450.1
0.0292177	20	3216	Anion binding	SOLYC06G076020.3 SOLYC09G075950.1 SOLYC10G086410.3 SOLYC11G066100.2 SOLYC02G064980.1 SOLYC02G090970.1 SOLYC02G090990.1 SOLYC03G097410.1 SOLYC03G112310.1 SOLYC03G113100.3 SOLYC03G115230.3 SOLYC03G117640.1 SOLYC04G006940.3 SOLYC07G063770.3 SOLYC08G068600.3 SOLYC09G008070.3 SOLYC11G020230.1 SOLYC11G071830.2 SOLYC12G005450.1 SOLYC12G098850.2
0.0352467	11	1363	Kinase activity	SOLYC02G064980.1 SOLYC02G090970.1 SOLYC02G090990.1 SOLYC03G097410.1 SOLYC03G112310.1 SOLYC03G117640.1 SOLYC07G063770.3 SOLYC12G005450.1 SOLYC03G083350.3 SOLYC09G075440.3 SOLYC11G020230.1
0.047455	5	372	ATPase activity	SOLYC06G076020.3 SOLYC09G008070.3 SOLYC09G075950.1 SOLYC10G086410.3 SOLYC11G066100.2

## Sheet: GOBP enrichment_downregulated
				GOBP terms enrichment analysis of downregulated genes
Enrichment FDR	Genes in list	Total genes	Functional Category	Genes
0.00835253	3	28	Drug transport	SOLYC03G118970.3 SOLYC11G010380.2 SOLYC12G005850.2
0.00835253	3	28	Response to drug	SOLYC03G118970.3 SOLYC11G010380.2 SOLYC12G005850.2
0.00835253	3	28	Drug transmembrane transport	SOLYC03G118970.3 SOLYC11G010380.2 SOLYC12G005850.2

## Sheet: GOCC enrichment_downregulated
					GOCC terms enrichment analysis of downregulated genes
Enrichment FDR	Genes in list	Total genes	Functional Category	Genes
0.0229803	23	3979	Integral component of membrane	SOLYC03G114960.3 SOLYC01G094020.3 SOLYC03G118970.3 SOLYC03G120310.3 SOLYC04G014520.1 SOLYC04G016440.3 SOLYC04G077810.1 SOLYC05G013207.1 SOLYC06G066680.3 SOLYC06G068150.3 SOLYC07G007800.3 SOLYC07G017610.3 SOLYC08G014080.3 SOLYC08G075240.3 SOLYC09G009150.1 SOLYC09G065800.3 SOLYC10G080880.2 SOLYC10G083690.3 SOLYC11G010380.2 SOLYC12G005850.2 SOLYC12G013690.2 SOLYC12G014430.2 SOLYC12G042380.2
0.0229803	23	4040	Intrinsic component of membrane	SOLYC03G114960.3 SOLYC01G094020.3 SOLYC03G118970.3 SOLYC03G120310.3 SOLYC04G014520.1 SOLYC04G016440.3 SOLYC04G077810.1 SOLYC05G013207.1 SOLYC06G066680.3 SOLYC06G068150.3 SOLYC07G007800.3 SOLYC07G017610.3 SOLYC08G014080.3 SOLYC08G075240.3 SOLYC09G009150.1 SOLYC09G065800.3 SOLYC10G080880.2 SOLYC10G083690.3 SOLYC11G010380.2 SOLYC12G005850.2 SOLYC12G013690.2 SOLYC12G014430.2 SOLYC12G042380.2

## Sheet: GOMF enrichment_downregulated
		GOMF terms enrichment analysis of downregulated genes
Enrichment FDR	Genes in list	Total genes	Functional Category	Genes
0.000601355	7	223	UDP-glycosyltransferase activity	SOLYC01G095620.3 SOLYC07G043480.1 SOLYC08G006410.3 SOLYC10G085870.1 SOLYC12G014010.2 SOLYC12G042600.2 SOLYC12G014430.2
0.00106248	6	196	Enzyme inhibitor activity	SOLYC08G006690.1 SOLYC11G005770.2 SOLYC03G020010.1 SOLYC03G020030.3 SOLYC06G072220.1 SOLYC06G072230.1
0.00106248	4	63	Endopeptidase inhibitor activity	SOLYC03G020010.1 SOLYC03G020030.3 SOLYC06G072220.1 SOLYC06G072230.1
0.00106248	4	63	Peptidase inhibitor activity	SOLYC03G020010.1 SOLYC03G020030.3 SOLYC06G072220.1 SOLYC06G072230.1
0.00106248	4	65	Peptidase regulator activity	SOLYC03G020010.1 SOLYC03G020030.3 SOLYC06G072220.1 SOLYC06G072230.1
0.00106248	4	64	Endopeptidase regulator activity	SOLYC03G020010.1 SOLYC03G020030.3 SOLYC06G072220.1 SOLYC06G072230.1
0.00240366	7	383	Transferase activity, transferring hexosyl groups	SOLYC01G095620.3 SOLYC08G006410.3 SOLYC10G085870.1 SOLYC12G014430.2 SOLYC07G043480.1 SOLYC12G014010.2 SOLYC12G042600.2
0.00240366	7	375	Enzyme regulator activity	SOLYC04G078310.3 SOLYC08G006690.1 SOLYC11G005770.2 SOLYC03G020010.1 SOLYC03G020030.3 SOLYC06G072220.1 SOLYC06G072230.1
0.00257844	8	531	Transferase activity, transferring glycosyl groups	SOLYC01G095620.3 SOLYC07G043480.1 SOLYC08G006410.3 SOLYC10G085870.1 SOLYC12G014010.2 SOLYC12G014430.2 SOLYC12G042600.2 SOLYC01G100210.3
0.00306696	3	39	Quercetin 3-O-glucosyltransferase activity	SOLYC01G095620.3 SOLYC08G006410.3 SOLYC10G085870.1
0.00306696	3	39	Quercetin 7-O-glucosyltransferase activity	SOLYC01G095620.3 SOLYC08G006410.3 SOLYC10G085870.1
0.00328796	12	1265	Molecular function regulator	SOLYC01G100460.3 SOLYC04G078310.3 SOLYC08G006690.1 SOLYC10G079380.2 SOLYC11G005770.2 SOLYC02G089420.1 SOLYC03G020010.1 SOLYC03G020030.3 SOLYC06G072220.1 SOLYC06G072230.1 SOLYC09G008810.3 SOLYC11G006230.2
0.00341814	4	107	UDP-glucosyltransferase activity	SOLYC01G095620.3 SOLYC08G006410.3 SOLYC10G085870.1 SOLYC12G014430.2
0.00606216	8	644	Sequence-specific DNA binding	SOLYC01G100460.3 SOLYC01G111500.3 SOLYC05G007450.3 SOLYC05G007690.2 SOLYC05G007710.3 SOLYC10G055410.2 SOLYC10G079380.2 SOLYC09G008810.3
0.00911651	4	144	Glucosyltransferase activity	SOLYC01G095620.3 SOLYC08G006410.3 SOLYC10G085870.1 SOLYC12G014430.2
0.0118643	3	70	Xenobiotic transmembrane transporter activity	SOLYC03G118970.3 SOLYC11G010380.2 SOLYC12G005850.2

## Sheet: Network edges_upregulated
	Edges of network containong top 30 functional groups of upregulated genes
	from	to	width
	Heat shock protein binding	Chaperone-mediated protein folding	1.25
	Heat shock protein binding	Response to organic substance	0.3125
	Chaperone-mediated protein folding	Response to organic substance	0.3125
	Heat shock protein binding	Response to topologically incorrect protein	1.63265
	Chaperone-mediated protein folding	Response to topologically incorrect protein	1.63265
	Response to organic substance	Response to topologically incorrect protein	0.637755
	Heat shock protein binding	Cellular response to topologically incorrect protein	1.63265
	Chaperone-mediated protein folding	Cellular response to topologically incorrect protein	1.63265
	Response to organic substance	Cellular response to topologically incorrect protein	0.637755
	Response to topologically incorrect protein	Cellular response to topologically incorrect protein	5
	Heat shock protein binding	de novo posttranslational protein folding	1.63265
	Chaperone-mediated protein folding	de novo posttranslational protein folding	3.47222
	Response to organic substance	de novo posttranslational protein folding	0.355556
	Response to topologically incorrect protein	de novo posttranslational protein folding	2.22222
	Cellular response to topologically incorrect protein	de novo posttranslational protein folding	2.22222
	Heat shock protein binding	Chaperone cofactor-dependent protein refolding	1.63265
	Chaperone-mediated protein folding	Chaperone cofactor-dependent protein refolding	3.47222
	Response to organic substance	Chaperone cofactor-dependent protein refolding	0.355556
	Response to topologically incorrect protein	Chaperone cofactor-dependent protein refolding	2.22222
	Cellular response to topologically incorrect protein	Chaperone cofactor-dependent protein refolding	2.22222
	de novo posttranslational protein folding	Chaperone cofactor-dependent protein refolding	5
	Response to organic substance	Response to stimulus	1.4497
	DNA-binding transcription factor activity	Transcription regulator activity	5
	Heat shock protein binding	Response to heat	1.95312
	Chaperone-mediated protein folding	Response to heat	0.987654
	Response to organic substance	Response to heat	0.276817
	Response to topologically incorrect protein	Response to heat	1.25
	Cellular response to topologically incorrect protein	Response to heat	1.25
	de novo posttranslational protein folding	Response to heat	1.25
	Chaperone cofactor-dependent protein refolding	Response to heat	1.25
	Response to stimulus	Response to heat	0.362426
	Heat shock protein binding	Misfolded protein binding	2.22222
	Chaperone-mediated protein folding	Misfolded protein binding	2.22222
	Response to organic substance	Misfolded protein binding	0.408163
	Response to topologically incorrect protein	Misfolded protein binding	3.2
	Cellular response to topologically incorrect protein	Misfolded protein binding	3.2
	de novo posttranslational protein folding	Misfolded protein binding	3.2
	Chaperone cofactor-dependent protein refolding	Misfolded protein binding	3.2
	Response to heat	Misfolded protein binding	1.63265
	Heat shock protein binding	Cellular response to organic substance	0.555556
	Chaperone-mediated protein folding	Cellular response to organic substance	0.555556
	Response to organic substance	Cellular response to organic substance	2.55102
	Response to topologically incorrect protein	Cellular response to organic substance	1.25
	Cellular response to topologically incorrect protein	Cellular response to organic substance	1.25
	de novo posttranslational protein folding	Cellular response to organic substance	0.661157
	Chaperone cofactor-dependent protein refolding	Cellular response to organic substance	0.661157
	Response to stimulus	Cellular response to organic substance	0.739645
	Response to heat	Cellular response to organic substance	0.473373
	Misfolded protein binding	Cellular response to organic substance	0.8
	Heat shock protein binding	Response to stress	0.34626
	Chaperone-mediated protein folding	Response to stress	0.2
	Response to organic substance	Response to stress	0.266272
	Response to topologically incorrect protein	Response to stress	0.385802
	Cellular response to topologically incorrect protein	Response to stress	0.385802
	de novo posttranslational protein folding	Response to stress	0.221607
	Chaperone cofactor-dependent protein refolding	Response to stress	0.221607
	Response to stimulus	Response to stress	2.39645
	Response to heat	Response to stress	0.756173
	Misfolded protein binding	Response to stress	0.246914
	Cellular response to organic substance	Response to stress	0.371901
	Heat shock protein binding	de novo protein folding	1.63265
	Chaperone-mediated protein folding	de novo protein folding	3.47222
	Response to organic substance	de novo protein folding	0.355556
	Response to topologically incorrect protein	de novo protein folding	2.22222
	Cellular response to topologically incorrect protein	de novo protein folding	2.22222
	de novo posttranslational protein folding	de novo protein folding	5
	Chaperone cofactor-dependent protein refolding	de novo protein folding	5
	Response to heat	de novo protein folding	1.25
	Misfolded protein binding	de novo protein folding	3.2
	Cellular response to organic substance	de novo protein folding	0.661157
	Response to stress	de novo protein folding	0.221607
	Heat shock protein binding	Protein folding chaperone	2.22222
	Chaperone-mediated protein folding	Protein folding chaperone	2.22222
	Response to organic substance	Protein folding chaperone	0.408163
	Response to topologically incorrect protein	Protein folding chaperone	3.2
	Cellular response to topologically incorrect protein	Protein folding chaperone	3.2
	de novo posttranslational protein folding	Protein folding chaperone	3.2
	Chaperone cofactor-dependent protein refolding	Protein folding chaperone	3.2
	Response to heat	Protein folding chaperone	1.63265
	Misfolded protein binding	Protein folding chaperone	5
	Cellular response to organic substance	Protein folding chaperone	0.8
	Response to stress	Protein folding chaperone	0.246914
	de novo protein folding	Protein folding chaperone	3.2
	Heat shock protein binding	Protein folding	1.54321
	Chaperone-mediated protein folding	Protein folding	2.8125
	Response to organic substance	Protein folding	0.246914
	Response to topologically incorrect protein	Protein folding	0.987654
	Cellular response to topologically incorrect protein	Protein folding	0.987654
	de novo posttranslational protein folding	Protein folding	1.95312
	Chaperone cofactor-dependent protein refolding	Protein folding	1.95312
	Response to heat	Protein folding	1.25
	Misfolded protein binding	Protein folding	1.25
	Cellular response to organic substance	Protein folding	0.408163
	Response to stress	Protein folding	0.283447
	de novo protein folding	Protein folding	1.95312
	Protein folding chaperone	Protein folding	1.25
	Heat shock protein binding	Cellular response to unfolded protein	2.22222
	Chaperone-mediated protein folding	Cellular response to unfolded protein	2.22222
	Response to organic substance	Cellular response to unfolded protein	0.408163
	Response to topologically incorrect protein	Cellular response to unfolded protein	3.2
	Cellular response to topologically incorrect protein	Cellular response to unfolded protein	3.2
	de novo posttranslational protein folding	Cellular response to unfolded protein	3.2
	Chaperone cofactor-dependent protein refolding	Cellular response to unfolded protein	3.2
	Response to heat	Cellular response to unfolded protein	1.63265
	Misfolded protein binding	Cellular response to unfolded protein	5
	Cellular response to organic substance	Cellular response to unfolded protein	0.8
	Response to stress	Cellular response to unfolded protein	0.246914
	de novo protein folding	Cellular response to unfolded protein	3.2
	Protein folding chaperone	Cellular response to unfolded protein	5
	Protein folding	Cellular response to unfolded protein	1.25
	Heat shock protein binding	Response to unfolded protein	2.22222
	Chaperone-mediated protein folding	Response to unfolded protein	2.22222
	Response to organic substance	Response to unfolded protein	0.408163
	Response to topologically incorrect protein	Response to unfolded protein	3.2
	Cellular response to topologically incorrect protein	Response to unfolded protein	3.2
	de novo posttranslational protein folding	Response to unfolded protein	3.2
	Chaperone cofactor-dependent protein refolding	Response to unfolded protein	3.2
	Response to heat	Response to unfolded protein	1.63265
	Misfolded protein binding	Response to unfolded protein	5
	Cellular response to organic substance	Response to unfolded protein	0.8
	Response to stress	Response to unfolded protein	0.246914
	de novo protein folding	Response to unfolded protein	3.2
	Protein folding chaperone	Response to unfolded protein	5
	Protein folding	Response to unfolded protein	1.25
	Cellular response to unfolded protein	Response to unfolded protein	5
	DNA-binding transcription factor activity	Molecular function regulator	3.95062
	Transcription regulator activity	Molecular function regulator	3.95062
	Heat shock protein binding	Cellular response to heat	1.63265
	Chaperone-mediated protein folding	Cellular response to heat	1.63265
	Response to organic substance	Cellular response to heat	0.355556
	Response to topologically incorrect protein	Cellular response to heat	2.22222
	Cellular response to topologically incorrect protein	Cellular response to heat	2.22222
	de novo posttranslational protein folding	Cellular response to heat	2.22222
	Chaperone cofactor-dependent protein refolding	Cellular response to heat	2.22222
	Response to heat	Cellular response to heat	2.55102
	Misfolded protein binding	Cellular response to heat	3.2
	Cellular response to organic substance	Cellular response to heat	0.661157
	Response to stress	Cellular response to heat	0.385802
	de novo protein folding	Cellular response to heat	2.22222
	Protein folding chaperone	Cellular response to heat	3.2
	Protein folding	Cellular response to heat	0.987654
	Cellular response to unfolded protein	Cellular response to heat	3.2
	Response to unfolded protein	Cellular response to heat	3.2
	DNA-binding transcription factor activity	Regulation of biological process	1.33769
	Response to stimulus	Regulation of biological process	0.502677
	Transcription regulator activity	Regulation of biological process	1.33769
	Response to stress	Regulation of biological process	0.295836
	Molecular function regulator	Regulation of biological process	1.17066
	Heat shock protein binding	Cellular response to stress	0.473373
	Chaperone-mediated protein folding	Cellular response to stress	0.473373
	Response to organic substance	Cellular response to stress	0.3125
	Response to topologically incorrect protein	Cellular response to stress	1.03306
	Cellular response to topologically incorrect protein	Cellular response to stress	1.03306
	de novo posttranslational protein folding	Cellular response to stress	0.555556
	Chaperone cofactor-dependent protein refolding	Cellular response to stress	0.555556
	Response to stimulus	Cellular response to stress	0.89497
	Response to heat	Cellular response to stress	0.739645
	Misfolded protein binding	Cellular response to stress	0.661157
	Cellular response to organic substance	Cellular response to stress	0.488281
	Response to stress	Cellular response to stress	1.86728
	de novo protein folding	Cellular response to stress	0.555556
	Protein folding chaperone	Cellular response to stress	0.661157
	Protein folding	Cellular response to stress	0.355556
	Cellular response to unfolded protein	Cellular response to stress	0.661157
	Response to unfolded protein	Cellular response to stress	0.661157
	Cellular response to heat	Cellular response to stress	1.03306
	Heat shock protein binding	Response to chemical	0.3125
	Chaperone-mediated protein folding	Response to chemical	0.3125
	Response to organic substance	Response to chemical	5
	Response to topologically incorrect protein	Response to chemical	0.637755
	Cellular response to topologically incorrect protein	Response to chemical	0.637755
	de novo posttranslational protein folding	Response to chemical	0.355556
	Chaperone cofactor-dependent protein refolding	Response to chemical	0.355556
	Response to stimulus	Response to chemical	1.4497
	Response to heat	Response to chemical	0.276817
	Misfolded protein binding	Response to chemical	0.408163
	Cellular response to organic substance	Response to chemical	2.55102
	Response to stress	Response to chemical	0.266272
	de novo protein folding	Response to chemical	0.355556
	Protein folding chaperone	Response to chemical	0.408163
	Protein folding	Response to chemical	0.246914
	Cellular response to unfolded protein	Response to chemical	0.408163
	Response to unfolded protein	Response to chemical	0.408163
	Cellular response to heat	Response to chemical	0.355556
	Cellular response to stress	Response to chemical	0.3125
	Heat shock protein binding	Cellular response to stimulus	0.221607
	Chaperone-mediated protein folding	Cellular response to stimulus	0.221607
	Response to organic substance	Cellular response to stimulus	1.13379
	Response to topologically incorrect protein	Cellular response to stimulus	0.432526
	Cellular response to topologically incorrect protein	Cellular response to stimulus	0.432526
	de novo posttranslational protein folding	Cellular response to stimulus	0.246914
	Chaperone cofactor-dependent protein refolding	Cellular response to stimulus	0.246914
	Response to stimulus	Cellular response to stimulus	2.13757
	Response to heat	Cellular response to stimulus	0.34626
	Misfolded protein binding	Cellular response to stimulus	0.276817
	Cellular response to organic substance	Cellular response to stimulus	1.7301
	Response to stress	Cellular response to stimulus	1.74587
	de novo protein folding	Cellular response to stimulus	0.246914
	Protein folding chaperone	Cellular response to stimulus	0.276817
	Cellular response to unfolded protein	Cellular response to stimulus	0.276817
	Response to unfolded protein	Cellular response to stimulus	0.276817
	Cellular response to heat	Cellular response to stimulus	0.432526
	Regulation of biological process	Cellular response to stimulus	0.523356
	Cellular response to stress	Cellular response to stimulus	2.09343
	Response to chemical	Cellular response to stimulus	1.13379
	DNA-binding transcription factor activity	Regulation of nitrogen compound metabolic process	1.46701
	Response to stimulus	Regulation of nitrogen compound metabolic process	0.210388
	Transcription regulator activity	Regulation of nitrogen compound metabolic process	1.46701
	Response to stress	Regulation of nitrogen compound metabolic process	0.332986
	Molecular function regulator	Regulation of nitrogen compound metabolic process	1.25
	Regulation of biological process	Regulation of nitrogen compound metabolic process	2.8125
	DNA-binding transcription factor activity	Regulation of macromolecule metabolic process	1.352
	Response to stimulus	Regulation of macromolecule metabolic process	0.2
	Transcription regulator activity	Regulation of macromolecule metabolic process	1.352
	Response to stress	Regulation of macromolecule metabolic process	0.3125
	Molecular function regulator	Regulation of macromolecule metabolic process	1.15912
	Regulation of biological process	Regulation of macromolecule metabolic process	3.08673
	Regulation of nitrogen compound metabolic process	Regulation of macromolecule metabolic process	4.55579
	DNA-binding transcription factor activity	Regulation of primary metabolic process	1.46701
	Response to stimulus	Regulation of primary metabolic process	0.210388
	Transcription regulator activity	Regulation of primary metabolic process	1.46701
	Response to stress	Regulation of primary metabolic process	0.332986
	Molecular function regulator	Regulation of primary metabolic process	1.25
	Regulation of biological process	Regulation of primary metabolic process	2.8125
	Regulation of nitrogen compound metabolic process	Regulation of primary metabolic process	5
	Regulation of macromolecule metabolic process	Regulation of primary metabolic process	4.55579
	DNA-binding transcription factor activity	Biological regulation	1.25
	Response to stimulus	Biological regulation	0.479025
	Transcription regulator activity	Biological regulation	1.25
	Response to stress	Biological regulation	0.280471
	Molecular function regulator	Biological regulation	1.09863
	Regulation of biological process	Biological regulation	4.66112
	Cellular response to stimulus	Biological regulation	0.493878
	Regulation of nitrogen compound metabolic process	Biological regulation	2.62188
	Regulation of macromolecule metabolic process	Biological regulation	2.87753
	Regulation of primary metabolic process	Biological regulation	2.62188
	Heat shock protein binding	Cellular response to chemical stimulus	0.555556
	Chaperone-mediated protein folding	Cellular response to chemical stimulus	0.555556
	Response to organic substance	Cellular response to chemical stimulus	2.55102
	Response to topologically incorrect protein	Cellular response to chemical stimulus	1.25
	Cellular response to topologically incorrect protein	Cellular response to chemical stimulus	1.25
	de novo posttranslational protein folding	Cellular response to chemical stimulus	0.661157
	Chaperone cofactor-dependent protein refolding	Cellular response to chemical stimulus	0.661157
	Response to stimulus	Cellular response to chemical stimulus	0.739645
	Response to heat	Cellular response to chemical stimulus	0.473373
	Misfolded protein binding	Cellular response to chemical stimulus	0.8
	Cellular response to organic substance	Cellular response to chemical stimulus	5
	Response to stress	Cellular response to chemical stimulus	0.371901
	de novo protein folding	Cellular response to chemical stimulus	0.661157
	Protein folding chaperone	Cellular response to chemical stimulus	0.8
	Protein folding	Cellular response to chemical stimulus	0.408163
	Cellular response to unfolded protein	Cellular response to chemical stimulus	0.8
	Response to unfolded protein	Cellular response to chemical stimulus	0.8
	Cellular response to heat	Cellular response to chemical stimulus	0.661157
	Cellular response to stress	Cellular response to chemical stimulus	0.488281
	Response to chemical	Cellular response to chemical stimulus	2.55102
	Cellular response to stimulus	Cellular response to chemical stimulus	1.7301

## Sheet: Network nodes_upregulated
		Top 30 nodes of network containing functional groups of upregulated genes
		id	size	shape	color	label
		Heat shock protein binding	8.7845	dot	#00FF00FF	Heat shock protein binding
		Chaperone-mediated protein folding	8.7845	dot	#00FF00FF	Chaperone-mediated protein folding
		DNA-binding transcription factor activity	14.0619	dot	#00FF00D2	DNA-binding transcription factor activity
		Response to organic substance	13.2101	dot	#00FF00C9	Response to organic substance
		Response to topologically incorrect protein	8.05349	dot	#00FF00C9	Response to topologically incorrect protein
		Cellular response to topologically incorrect protein	8.05349	dot	#00FF00C9	Cellular response to topologically incorrect protein
		de novo posttranslational protein folding	8.05349	dot	#00FF00C9	de novo posttranslational protein folding
		Chaperone cofactor-dependent protein refolding	8.05349	dot	#00FF00C9	Chaperone cofactor-dependent protein refolding
		Response to stimulus	17.5134	dot	#00FF00C8	Response to stimulus
		Transcription regulator activity	14.0619	dot	#00FF00AD	Transcription regulator activity
		Response to heat	9.46369	dot	#00FF00AD	Response to heat
		Misfolded protein binding	7.26548	dot	#00FF00AD	Misfolded protein binding
		Cellular response to organic substance	11.25	dot	#00FF0093	Cellular response to organic substance
		Response to stress	14.8482	dot	#00FF0093	Response to stress
		de novo protein folding	8.05349	dot	#00FF0092	de novo protein folding
		Protein folding chaperone	7.26548	dot	#00FF008F	Protein folding chaperone
		Protein folding	10.0973	dot	#00FF007D	Protein folding
		Cellular response to unfolded protein	7.26548	dot	#00FF0063	Cellular response to unfolded protein
		Response to unfolded protein	7.26548	dot	#00FF0063	Response to unfolded protein
		Molecular function regulator	14.8482	dot	#00FF0055	Molecular function regulator
		Cellular response to heat	8.05349	dot	#00FF0048	Cellular response to heat
		Regulation of biological process	18.0892	dot	#00FF0042	Regulation of biological process
		Cellular response to stress	11.7781	dot	#00FF0041	Cellular response to stress
		Response to chemical	13.2101	dot	#00FF0041	Response to chemical
		Cellular response to stimulus	14.4625	dot	#00FF003D	Cellular response to stimulus
		Regulation of nitrogen compound metabolic process	15.9266	dot	#00FF003B	Regulation of nitrogen compound metabolic process
		Regulation of macromolecule metabolic process	16.2631	dot	#00FF0038	Regulation of macromolecule metabolic process
		Regulation of primary metabolic process	15.9266	dot	#00FF0035	Regulation of primary metabolic process
		Biological regulation	18.3663	dot	#00FF0033	Biological regulation
		Cellular response to chemical stimulus	11.25	dot	#00FF0033	Cellular response to chemical stimulus
