# Supplementary material for: β-Cyclocitral, a Master Regulator of Multiple Stress-Responsive Genes in Solanum lycopersicum L. Plants
Source: Plants (Basel). 2021 Nov 15;10(11):2465. doi: 10.3390/plants10112465 (PMC8618229; doi:10.3390/plants10112465)
Supplement: Supplementary file 1 [file plants-10-02465-s001.zip › Supplemental Data S4.xlsx]

## Sheet: Sheet1
					Functional prediction of up regulated genes
Genes involed only in abiotic stress responses												Genes involved in regulation of only biotic stress responses									Genes involved in regulation of both abiotic and biotic stress responses
GeneID	Description			Stress				Molecular class			GeneID	Description	Stress			Molecular class				GeneID	Description	Stress							Molecular class
Solyc09g005480.3	putative F-box protein At3g16210 isoform X4			Drought			F-box protein				Solyc03g043700.3	U-box domain-containing protein 4-like/U-box domain-containing protein 4-like isoform X2	Pathogen			U-box protein				Solyc05g046310.3	uncharacterized protein LOC101265337	Drought, Oxidative, Salinity, Nematode							NOT FOUND
Solyc03g115230.3	chaperone protein ClpB1			Heat			Chaperone				Solyc05g009170.2	zinc finger protein GIS3/zinc finger protein 6	Pathogen			Zinc finger domain containing protein				Solyc04g079360.1	transcription factor MYB44-like	Drought, Salinity, Bacteria, Fungi							Transcription factor
Solyc08g080540.3	heat stress transcription factor B-2b			Heat			Transcription factor				Solyc11g010250.1	uncharacterized LOC101262884	Virus, Fungus			Receptor				Solyc04g078420.1	transcription factor MYB44/transcription factor MYB44-like	Drought, Salinity, Bacteria, Fungi							Transcription factor
Solyc03g119390.3	transcription factor BEE 3			Drought, Low light			Transcription factor				Solyc03g116890.3	probable WRKY transcription factor 40 isoform X1/probable WRKY transcription factor 40	Bacteria, Fungus, Herbivore			Transcription factor				Solyc02g088090.1	probable calcium-binding protein CML30	Light, Herbivory							Signaling protein
Solyc11g071830.2	dnaJ protein homolog			Heat			Chaperone				Solyc06g071750.3	uncharacterized protein LOC101267816	Fungus			Protein kinase				Solyc09g092670.3	cytochrome P450 83B1	Oxidative, Low light, Bacteria, Fungi, Herbivory							Enzyme
Solyc09g015770.3	WRKY transcription factor 81			Drought, Salinity			Transcription factor				Solyc12g005450.1	probable receptor-like protein kinase At4g10390	Herbivory			Receptor-like kinase				Solyc08g068690.1	tyramine N-feruloyltransferase 4/11	Drought, Pathogen, Herbivore							Enzyme
Solyc06g076020.3	heat shock cognate 70 kDa protein 1			Heat			Chaperone				Solyc11g012980.1	ethylene-responsive transcription factor ERF014	Bacteria, Fungus			Transcription factor				Solyc04g058170.1	probable calcium-binding protein CML44	Drought, Cold, Oxidative, Salinity, Pathogen							Signaling protein
Solyc11g066100.2	heat shock cognate 70 kDa protein			Heat			Chaperone				Solyc02g069260.3	argonaute 2A	Virus			RNA silencer protein				Solyc03g120090.1	pyridoxal 5'-phosphate synthase-like subunit PDX1.2	Oxidative, Bacteria							Enzyme
Solyc02g091390.3	uncharacterized LOC101258509			Drought, Cold			Membrane transporter				Solyc12g009240.1	ethylene-responsive transcription factor ERF017	Fungus			Transcription factor				Solyc10g050970.1	ethylene-responsive transcription factor ERF109-like	Drought, Salinity, Cold, Heat, Light, Oxidation, Herbivore, Fungus							Transcription factor
Solyc03g044860.1	uncharacterized protein LOC101253064			Drought, Cold, Salinity			NOT FOUND				Solyc03g007950.3	probable polygalacturonase	Fungus			Enzyme				Solyc11g012510.2	GRAS1 protein	Mechanical/Herbivory, Bacteria							Transcription factor
Solyc02g077670.3	dnaJ protein homolog 1			Heat, Salinity, Drought, Cold			Chaperone				Solyc02g093250.3	caffeoyl-CoA O-methyltransferase	Herbivory, Pathogen			Enzyme				Solyc07g064600.3	inducible plastid-lipid associated protein	Light, Drought, Bacteria							Enzyme
Solyc03g123550.1	auxin-responsive protein SAUR71			Salinity, Drought, Cold			Auxin-responsive protein				Solyc07g065165.1	pirin-like protein At1g50590	Virus			Enzyme				Solyc02g091180.1	uncharacterized protein LOC104645686	Hypoxia, Fungus							NOT FOUND
Solyc09g092690.3	70 kDa peptidyl-prolyl isomerase			Heat			Enzyme				Solyc09g008070.3	cell division cycle protein 48 homolog	Virus, Pathogen			Adaptor of proteasome complex				Solyc01g110800.3	auxin-induced protein 15A-like	Salinity, Cold, Drought, Fungus							Auxin responsive protein
Solyc05g009340.1	uncharacterized protein LOC104647284			Drought			NOT FOUND				Solyc07g008620.1	receptor-like protein EIX1 precursor	Fungus, Bacteria			Receptor				Solyc04g014600.3	universal stress protein PHOS32/universal stress protein A-like protein	Heat, Oxidation, Cold, Salinity, Drought, Fungus							Chaperone
Solyc03g097410.1	inositol-tetrakisphosphate 1-kinase 5-like/inositol-tetrakisphosphate 1-kinase 1-like			Drought, Salinity			Receptor-like kinase				Solyc08g068600.3	histidine decarboxylase-like	Nematode			Enzyme				Solyc09g091960.3	high mobility group B protein 15	Oxidative, Bacterial							Transcription factor activator
Solyc05g056560.3	protein OPI10 homolog			Heat			Membrane transporter				Solyc09g011170.3	Prf interactor 30137	Pathogen			Auxin responsive protein				Solyc03g083350.3	phosphatidylinositol 4-kinase gamma 3	Cold, Salinity, Fungus, Bacteria							Signaling kinase
Solyc09g011030.3	hsp70-binding protein 1			Heat, Light			Chaperone				Solyc03g093610.1	ethylene-responsive transcription factor 1	Bacteria, Fungus			Transcription factor				Solyc08g076930.1	transcription factor MYC2	Cold, Oxidation, Fungi, Herbivore, Nematode							Transcription factor
Solyc09g008970.1	uncharacterized protein LOC101245195			Oxidative			NOT FOUND				Solyc03g006620.3	uncharacterized protein LOC101263673	Bacteria			NOT FOUND				Solyc09g061310.3	desumoylating isopeptidase 1	Drought, Salinity, Light, Pathogen							Enzyme
Solyc12g096570.1	ARGOS			Drought			NOT FOUND				Solyc03g114160.1	U-box domain-containing protein 19-like	Virus			U-box protein				Solyc03g121400.1	dof zinc finger protein DOF3.1/dof zinc finger protein DOF3.1-like	Drought, Salinity, Cold, Heat, Fungus							Zinc finger domain containing protein
Solyc10g008260.2	transcription factor bHLH162-like			Salinity			Transcription factor				Solyc06g074030.1	probable CCR4-associated factor 1 homolog 9	Bacteria, Herbivory			Enzyme				Solyc12g014480.2	uncharacterized protein LOC101246405 isoform X2/uncharacterized protein LOC101246405	All							NOT FOUND
Solyc04g006940.3	putative phospholipid-transporting ATPase 9			Heat			Enzyme				Solyc03g112310.1	clade X lectin receptor kinase	Bacteria, Fungus			Receptor-like kinase
Solyc09g005120.3	dnaJ protein ERDJ3A			Heat			Chaperone				Solyc10g085590.1	protein ELC-like	Bacteria			Ubiquitin-conjugating enzyme
Solyc07g040960.1	salt responsive protein 2			Salinity			Enzyme				Solyc01g111980.3	lysine histidine transporter-like 8	Fungus			Transporter
Solyc06g049020.1	uncharacterized protein LOC101254906			Cold, Oxidation			NOT FOUND				Solyc08g082090.1	uncharacterized protein LOC101261732	Fungus			NOT FOUND
Solyc02g064980.1	mitogen-activated protein kinase kinase kinase 18-like			Salinity, Drought, Cold, Oxidative			Signaling kinase				Solyc03g113100.3	ubiquitin-conjugating enzyme E2 2	Virus			Ubiquitin-conjugating enzyme
Solyc01g111970.3	L-ascorbate oxidase homolog			Oxidative			Enzyme
Solyc05g052520.3	putative protein phosphatase 2C 53			Drought			Signaling phosphatase
Solyc01g110930.1	auxin-responsive protein SAUR21-like			Low light			Auxin-responsive protein
Solyc09g075950.1	heat shock 70 kDa protein 8			Heat, Light			Chaperone
Solyc07g063770.3	G-type lectin S-receptor-like serine/threonine-protein kinase At4g27290 isoform X1			Salinity			Receptor-like kinase
Solyc08g074960.3	protein NUCLEAR FUSION DEFECTIVE 4			Salinity			Membrane transporter
Solyc09g056450.3	U-box domain-containing protein 9			Drought			U-box protein
Solyc05g012820.1	uncharacterized protein LOC101254997/uncharacterized protein LOC101256182			Heat			NOT FOUND
Solyc09g075470.2	dnaJ homolog subfamily B member 6-like			Cold, Drought, Salinity, Heat			Chaperone
Solyc04g072900.1	dehydration-responsive element binding protein 3			Drought, Salinity, Cold, Oxidative			Transcription factor
Solyc07g053050.1	calcium-binding protein KRP1			Hypoxia			Signaling protein
Solyc10g006130.1	ethylene-responsive transcription factor 3/ethylene-responsive transcription factor 3-like			Cold, Drought			Transcription factor
Solyc10g078930.2	activator of 90 kDa heat shock protein ATPase homolog			Heat			Co-chaperone
Solyc04g017690.3	protein EARLY RESPONSIVE TO DEHYDRATION 15			Drought, Cold			Transcription factor
Solyc09g061760.1	pentatricopeptide repeat-containing protein At2g17525, mitochondrial			Salinity			RNA-binding protein
Solyc12g049560.2	ethylene-responsive transcription factor RAP2-12			Hypoxia			Transcription factor
Solyc04g063380.3	F-box protein SKP2B			Heat			F-box protein
Solyc10g086410.3	heat shock cognate 70 kDa protein 2			Heat			Chaperone
Solyc09g072980.2	BTB/POZ and MATH domain-containing protein 2-like			Salinity, Drought			Adaptor of E3 ubiquitin ligase complex
Solyc12g056410.2	F-box protein PP2-A13-like			Drought			F-box protein
Solyc12g098850.2	diacylglycerol O-acyltransferase 3, cytosolic/UPF0396 protein CG6066			Drought, Cold			Enzyme
Solyc10g084170.1	BAG family molecular chaperone regulator 5, mitochondrial-like			Heat			Chaperone
