# Supplementary material for: β-Cyclocitral, a Master Regulator of Multiple Stress-Responsive Genes in Solanum lycopersicum L. Plants
Source: Plants (Basel). 2021 Nov 15;10(11):2465. doi: 10.3390/plants10112465 (PMC8618229; doi:10.3390/plants10112465)
Supplement: Supplementary file 1 [file plants-10-02465-s001.zip › Supplemental Data S5.xlsx]

## Sheet: KEGG enrichment
				KEGG enrichment analysis
	Enrichment FDR	Genes in list	Total genes	Functional Category	Genes
	8.06876e-06	6	106	Protein processing in endoplasmic reticulum	SOLYC06G076020.3 SOLYC10G086410.3 SOLYC09G011030.3 SOLYC11G066100.2 SOLYC11G071830.2 SOLYC09G008070.3
	0.001519	4	101	Endocytosis	SOLYC06G076020.3 SOLYC10G086410.3 SOLYC11G066100.2 SOLYC10G085590.1
	0.00741405	3	77	Spliceosome	SOLYC06G076020.3 SOLYC10G086410.3 SOLYC11G066100.2
	0.01682	2	37	Phosphatidylinositol signaling system	SOLYC02G088090.1 SOLYC03G097410.1
	0.01682	3	117	Plant-pathogen interaction	SOLYC04G058170.1 SOLYC02G088090.1 SOLYC07G008620.1
	0.0197068	3	139	Plant hormone signal transduction	SOLYC01G110800.3 SOLYC03G123550.1 SOLYC08G076930.1
	0.0480664	2	76	Ubiquitin mediated proteolysis	SOLYC03G113100.3 SOLYC04G063380.3

## Sheet: KEGG network_nodes
	KEGG enrichment network nodes
	id	size	shape	color	label
	Protein processing in endoplasmic reticulum	8.7845	dot	#00FF00FF	Protein processing in endoplasmic reticulum
	Endocytosis	7.26548	dot	#00FF008E	Endocytosis
	Spliceosome	6.42278	dot	#00FF0064	Spliceosome
	Phosphatidylinositol signaling system	5.56637	dot	#00FF004F	Phosphatidylinositol signaling system
	Plant-pathogen interaction	6.42278	dot	#00FF004F	Plant-pathogen interaction
	Plant hormone signal transduction	6.42278	dot	#00FF004B	Plant hormone signal transduction
	Ubiquitin mediated proteolysis	5.56637	dot	#00FF0033	Ubiquitin mediated proteolysis

## Sheet: KEGG network_edges
	KEGG enrichment netwok edges
	from	to	width
	Protein processing in endoplasmic reticulum	Endocytosis	0.918367
	Protein processing in endoplasmic reticulum	Spliceosome	1.25
	Endocytosis	Spliceosome	2.8125
	Phosphatidylinositol signaling system	Plant-pathogen interaction	0.3125
