# Supplementary material for: β-Cyclocitral, a Master Regulator of Multiple Stress-Responsive Genes in Solanum lycopersicum L. Plants
Source: Plants (Basel). 2021 Nov 15;10(11):2465. doi: 10.3390/plants10112465 (PMC8618229; doi:10.3390/plants10112465)
Supplement: Supplementary file 1 [file plants-10-02465-s001.zip › Supplemental Data S6.pdf]

**Supplemental Data S6: Summary of genes present in co-functional network of stress-responsive upregulated genes.** Among 92 stress-responsive genes, 18 genes are showing co-expression. The table summarizes the query genes that are part of the co-functional network with their description, number of query genes connected to each one of them along with respective gene IDs, and score of their connection with query genes.

| Rank | Query genes' ID  | Description                                                    | Linked query genes | Linked query gene ID                                                                                                 | Score |
|------|------------------|----------------------------------------------------------------|--------------------|----------------------------------------------------------------------------------------------------------------------|-------|
| 1    | Solyc09g075950.1 | Heat shock 70 kDa protein 8                                    | 6                  | Solyc03g120090.1<br>Solyc04g078420.1<br>Solyc09g008970.1<br>Solyc09g075470.2<br>Solyc10g084170.1<br>Solyc12g009240.1 | 17.47 |
| 2    | Solyc06g074030.1 | Probable CCR4-associated factor 1 homolog 9                    | 6                  | Solyc02g091180.1<br>Solyc03g093610.1<br>Solyc06g049020.1<br>Solyc08g082090.1<br>Solyc10g006130.1<br>Solyc10g050970.1 | 14.21 |
| 3    | Solyc08g082090.1 | Uncharacterized protein LOC101261732                           | 6                  | Solyc02g088090.1<br>Solyc02g091180.1<br>Solyc03g093610.1<br>Solyc06g074030.1<br>Solyc08g076930.1<br>Solyc10g006130.1 | 13.22 |
| 4    | Solyc10g006130.1 | Ethylene-responsive transcription factor 3                     | 4                  | Solyc02g091180.1<br>Solyc06g049020.1<br>Solyc06g074030.1<br>Solyc08g082090.1                                         | 8.95  |
| 5    | Solyc02g091180.1 | Uncharacterized protein LOC104645686                           | 4                  | Solyc06g074030.1<br>Solyc08g076930.1<br>Solyc08g082090.1<br>Solyc10g006130.1                                         | 8.87  |
| 6    | Solyc03g120090.1 | Pyridoxal 5'-phosphate synthase-like subunit PDX1.2            | 2                  | Solyc09g075950.1<br>Solyc10g084170.1                                                                                 | 5.39  |
| 7    | Solyc12g009240.1 | Ethylene-responsive transcription factor ERF017                | 2                  | Solyc09g075950.1<br>Solyc10g050970.1                                                                                 | 4.73  |
| 8    | Solyc10g084170.1 | BAG family molecular chaperone regulator 5, mitochondrial-like | 2                  | Solyc03g120090.1<br>Solyc09g075950.1                                                                                 | 4.56  |

|    |                  |                                                                |   |                                      |      |
|----|------------------|----------------------------------------------------------------|---|--------------------------------------|------|
| 9  | Solyc09g075470.2 | dnaJ homolog<br>subfamily B<br>member 6-like                   | 1 | Solyc09g075950.1                     | 4.35 |
| 10 | Solyc04g072900.1 | Dehydration-<br>responsive element<br>binding protein 3        | 1 | Solyc09g072980.2                     | 4.28 |
| 11 | Solyc09g072980.2 | BTB/POZ and<br>MATH domain-<br>containing protein<br>2-like    | 1 | Solyc04g072900.1                     | 4.28 |
| 12 | Solyc03g093610.1 | Ethylene-<br>responsive<br>transcription factor<br>1           | 2 | Solyc06g074030.1<br>Solyc08g082090.1 | 3.36 |
| 13 | Solyc08g076930.1 | Transcription factor<br>MYC2                                   | 2 | Solyc02g091180.1<br>Solyc08g082090.1 | 3.31 |
| 14 | Solyc06g049020.1 | Uncharacterized<br>protein<br>LOC101254906                     | 2 | Solyc06g074030.1<br>Solyc10g006130.1 | 3.17 |
| 15 | Solyc04g078420.1 | Transcription factor<br>MYB44                                  | 1 | Solyc09g075950.1                     | 2.8  |
| 16 | Solyc10g050970.1 | Ethylene-<br>responsive<br>transcription factor<br>ERF109-like | 2 | Solyc06g074030.1<br>Solyc12g009240.1 | 2.17 |
| 17 | Solyc09g008970.1 | Uncharacterized<br>protein<br>LOC101245195                     | 1 | Solyc09g075950.1                     | 2.13 |
| 18 | Solyc02g088090.1 | Probable calcium-<br>binding protein<br>CML30                  | 1 | Solyc08g082090.1                     | 1.15 |
