# Supplementary material for: β-Cyclocitral, a Master Regulator of Multiple Stress-Responsive Genes in Solanum lycopersicum L. Plants
Source: Plants (Basel). 2021 Nov 15;10(11):2465. doi: 10.3390/plants10112465 (PMC8618229; doi:10.3390/plants10112465)
Supplement: Supplementary file 1 [file plants-10-02465-s001.zip › Supplemental Data S7.pdf]

**Table S1. Sequences of primers used in Real time-quantitative PCR (RT-qPCR).**

Primers are designed on the cDNA of *Solanum lycopersicum* and used for RT-qPCR amplification for the validation of differentially expressed genes.

| Gene ID            | Primer Sequence                                        | Description                                             | Tm (°C) | Product size (bp) |
|--------------------|--------------------------------------------------------|---------------------------------------------------------|---------|-------------------|
| Solyc08g076930.1   | 5'TACTTCCAGGGGAAGCAATG3'<br>3'GACGTGATTCAATGGCTCCT5'   | MYC2                                                    | 60      | 210               |
| Solyc04g072900.1   | 5'TGGAGGAAGAGGAGAGCAAA3'<br>3'GAGAGGCCCAATCAATTTC5'    | Dehydration-responsive element binding protein 3 (DREB) | 60      | 238               |
| Solyc09g015770.3   | 5'TGATGGTCATGCTTGGAGAA3'<br>3'GCTTTGCAAGTGTGATGTCC5'   | WRKY 3                                                  | 60      | 199               |
| Solyc10g086410.3   | 5'TGGCCTAAATGTGATGCGTA3'<br>3'CCAGCAGTAGCCTTCACCTC5'   | Heat shock cognate70 (HSC70)                            | 55      | 183               |
| Solyc09g075440.3   | 5'AGGAAGAACATTGGCATTGG3'<br>3'GCATGTATTTCCCAGCAGGT5'   | Ethylene Receptor                                       | 60      | 238               |
| Solyc02g094040.3   | 5'CATTTCATCGCCGTTGACAT3'<br>3'TGCTTGTTCTTGGCCTTCAC5'   | Lipase                                                  | 54      | 204               |
| Solyc05g051660.1   | 5'AACACCGCACCCAATCAAAA3'<br>3'GTGCATCCCAACAATCCTGG5'   | Acylsugar acylhydrolase 1 (ASH1)                        | 54      | 202               |
| Solyc02g080530.3   | 5'CAAGCGCATCAGACACATCT3'<br>3'GCCACCAGTGGAGTTGAAAT5'   | Peroxidase                                              | 60      | 165               |
| Solyc11g072630.2   | 5'CCGGAGCTTTTGTGAACTC3'<br>3'GTGGGAGTTGCCTGACGTAT5'    | Mitogen-activated protein kinase 3 (MPK3)               | 52      | 185               |
| Solyc08g006410.3   | 5'CAAAGGGAAAAGGGATGGTT3'<br>3'ACCCCTATGCCAAGTTCCTC 5'  | Glycosyltransferase                                     | 60      | 194               |
| House keeping gene | 5'GCCATCAAGGAGGAATCTGA3'<br>3'CATTTCGTTGTCGTACCATGCS5' | Glyceraldehyde 3-phosphate dehydrogenase (GAPDH)        | 60      | 173               |
